# Supplementary material for: One-pot cascade reactions of 1-arylpenta-3,4-dien-2-ones leading to 2-arylphenols and dibenzopyroanones
Source: Royal Society of Chemistry journal article supplement (doi:10.1039/c4cc06204c), 2014-01-01
Supplement: c4cc06204c1.pdf [file c4cc06204c1.pdf]

## Supporting Information

### One-pot cascade reactions of 1-arylpenta-3,4-dien-2-ones leading to 2-arylphenols and dibenzopyranones

Yan He, Xinying Zhang,\* and Xuesen Fan\*

*School of Environment, School of Chemistry and Chemical Engineering, Collaborative Innovation Center of Henan  
Province for Green Manufacturing of Fine Chemicals, Henan Key Laboratory for Environmental Pollution Control,*

*Henan Normal University, Xinxiang, Henan 453007, P. R. China*

*E-mail: xuesen.fan@htu.cn; xinyingzhang@htu.cn*

|            |                                                                          |       |
|------------|--------------------------------------------------------------------------|-------|
| <b>I</b>   | General Experimental Information                                         | 2     |
| <b>II</b>  | Experimental Procedures and Spectroscopic Data                           | 3-20  |
| <b>III</b> | Copies of <sup>1</sup> H and <sup>13</sup> C NMR spectra of <b>3a-3u</b> | 21-41 |
| <b>IV</b>  | Copies of <sup>1</sup> H and <sup>13</sup> C NMR spectra of <b>4a-4r</b> | 42-59 |
| <b>V</b>   | References                                                               | 60    |

## I. General Experimental Information

Unless otherwise noted, all commercial reagents were used without further purification. The solvents were dried prior to use. 1-Arylpenta-3,4-dien-2-ones (**1**) were synthesized through oxidation of the corresponding homopropargyl alcohols,<sup>1</sup> which were prepared through zinc promoted propargylation of the corresponding aldehydes.<sup>2</sup> All the activated ketones (**2**) are commercially available. Column chromatography was conducted with 200-300 mesh silica gel. Melting points were recorded with a micro melting point apparatus and uncorrected. <sup>1</sup>H NMR (400 MHz) and <sup>13</sup>C NMR (100 MHz) were recorded on Bruker 400 MHz spectrometers. Chemical shifts were reported in ppm by assigning TMS resonance in the <sup>1</sup>H spectrum as 0.00 ppm, CDCl<sub>3</sub> resonance in the <sup>13</sup>C spectrum as 77.0 ppm. All coupling constants (*J* values) were reported in Hertz (Hz). High-resolution mass spectra (HRMS) were obtained by using a MicrOTOF mass spectrometer. All reactions were monitored by thin-layer chromatography (TLC) using silica gel plates (60 F254 0.25 mm) and components were visualized by observation under UV light (254 and 365 nm).

## II. Experimental Procedures and Spectroscopic Data

### 1. Experimental procedures for the synthesis and spectroscopic data of 1-phenylpent-4-yn-2-ol (**II**)<sup>1,3</sup> and 1-phenyl-penta-3,4-dien-2-one (**1a**)<sup>2</sup>

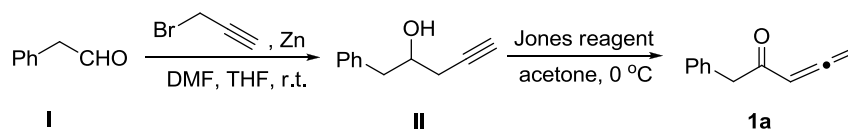

#### 1-Phenylpent-4-yn-2-ol (**II**)

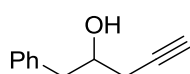

**Typical procedure:**<sup>1</sup> To a flask containing 2-phenylacetaldehyde (**I**, 240 mg, 2 mmol), THF (4 mL), and propargyl bromide (0.313 mL, 4 mmol) were added activated zinc dust (384 mg, 6 mmol) portion-wise with stirring. The mixture was then stirred at room temperature. Upon completion, it was diluted with saturated aqueous  $\text{NH}_4\text{Cl}$  (10 mL) and the excess zinc was filtered. The filtrate was concentrated and to the residue was added water. The aqueous phase was extracted with EtOAc (10 mL  $\times$  3). The combined organic phase was dried with anhydrous  $\text{Na}_2\text{SO}_4$  and concentrated. The residue was purified by column chromatography on silica gel (petroleum ether / ethyl acetate = 10:1) to afford 294 mg (92%) of **II**: yellow liquid;  $^1\text{H NMR}$  (400 MHz,  $\text{CDCl}_3$ )  $\delta$ : 2.14 (s, 1H), 2.36-2.46 (m, 2H), 2.60 (br s, 1H), 2.83-2.98 (m, 2H), 3.92-4.06 (m, 1H), 7.27-7.38 (m, 5H);  $^{13}\text{C NMR}$  (100 MHz,  $\text{CDCl}_3$ )  $\delta$ : 26.4, 42.4, 70.9, 71.3, 81.0, 126.7, 128.6, 129.6, 138.0; MS:  $m/z$  161  $[\text{MH}]^+$ .

#### 1-Phenylpenta-3,4-dien-2-ones (**1a**)

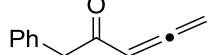

**Typical procedure:**<sup>2</sup> To a solution of 1-phenylpent-4-yn-2-ol (**II**, 160 mg, 1 mmol) in acetone (10 mL) cooled to 0 °C was added Jones reagent (0.44 mL, 1.2 mmol) in a drop-wise manner. Upon complete consumption of the starting material as monitored by TLC, the reaction mixture was quenched by addition of isopropanol. The resulting mixture was filtered and the filtrate was concentrated under vacuum. The residue were purified by column chromatography on silica gel (petroleum ether / ethyl acetate = 10:1) to afford 142 mg (90%) of **1a**: yellow liquid;  $^1\text{H NMR}$  (400

MHz,  $\text{CDCl}_3$ )  $\delta$ : 3.93 (s, 2H), 5.32 (d,  $J = 6.8$  Hz, 2H), 5.85 (t,  $J = 6.8$  Hz, 1H), 7.25-7.36 (m, 5H);  $^{13}\text{C}$  NMR (100 MHz,  $\text{CDCl}_3$ )  $\delta$ : 45.9, 80.0, 96.6, 126.9, 128.6, 129.5, 134.6, 197.8, 217.3; MS:  $m/z$  159  $[\text{MH}]^+$ .

## 2. Experimental procedures for the synthesis and spectroscopic data of 3

### Ethyl 6-hydroxy-2,4-dimethylbiphenyl-3-carboxylate (**3a**)

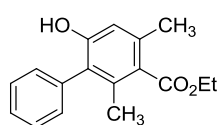

**Typical procedure:** To a flask containing 1-phenylpenta-3,4-dien-2-one (**1a**, 79 mg, 0.5 mmol) and ethyl 3-oxobutanoate (**2a**, 78 mg, 0.6 mmol) were added  $\text{CH}_3\text{CN}$  (5 mL) and  $\text{Cs}_2\text{CO}_3$  (163 mg, 0.5 mmol). The mixture was stirred at 80 °C. Upon completion as monitored by TLC, the reaction was quenched with aqueous  $\text{NH}_4\text{Cl}$ . Then, the mixture was extracted with ethyl acetate (5 mL  $\times$  3). The combined organic layer was washed with water and brine, and then dried over anhydrous  $\text{Na}_2\text{SO}_4$ . The solvent was evaporated under vacuum and the crude product was purified by chromatography on silica-gel (petroleum ether / ethyl acetate = 20:1) to afford 115 mg (85%) of **3a**: Yellow solid; Mp: 120-122 °C (ethanol);  $^1\text{H}$  NMR (400 MHz,  $\text{CDCl}_3$ )  $\delta$ : 1.37-1.40 (m, 3H), 2.02 (s, 3H), 2.33 (s, 3H), 4.36-4.41 (m, 2H), 4.89 (s, 1H), 6.71 (s, 1H), 7.24 (dd,  $J_1 = 7.2$  Hz,  $J_2 = 0.8$  Hz, 2H), 7.40-7.44 (m, 1H), 7.48-7.52 (m, 2H);  $^{13}\text{C}$  NMR (100 MHz,  $\text{CDCl}_3$ )  $\delta$ : 14.3, 17.8, 19.7, 60.9, 114.3, 126.1, 127.2, 128.3, 129.5, 130.4, 134.3, 134.7, 136.0, 153.4, 170.3; MS:  $m/z$  271  $[\text{MH}]^+$ ; HRMS calcd for  $\text{C}_{17}\text{H}_{19}\text{O}_3$ : 271.1334  $[\text{M}+\text{H}]$ , found: 271.1338.

### Ethyl 6-hydroxy-4'-methoxy-2,4-dimethylbiphenyl-3-carboxylate (**3b**)

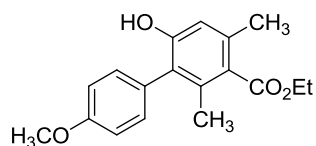

The reaction of 1-(4-methoxyphenyl)penta-3,4-dien-2-one (**1b**, 94 mg, 0.5 mmol), ethyl 3-oxobutanoate (**2a**, 78 mg, 0.6 mmol) and  $\text{Cs}_2\text{CO}_3$  (163 mg, 0.5 mmol) in  $\text{CH}_3\text{CN}$  (5 mL) afforded 125 mg (83%) of **3b**: Eluent: ethyl acetate / petroleum ether (5%); Yellow solid; Mp: 92-94 °C (ethanol);  $^1\text{H}$  NMR (400 MHz,  $\text{CDCl}_3$ )  $\delta$ : 1.38 (t,  $J = 6.8$  Hz, 3H), 2.03 (s, 3H), 2.31 (s, 3H), 3.83 (s, 3H), 4.37 (q,  $J = 7.6$  Hz, 2H), 5.24 (s, 1H), 6.67 (s, 1H), 7.00 (dd,  $J_1 = 6.8$  Hz,

$J_2 = 1.6$  Hz, 2H), 7.14 (dd,  $J_1 = 6.8$  Hz,  $J_2 = 2.0$  Hz, 2H);  $^{13}\text{C}$  NMR (100 MHz,  $\text{CDCl}_3$ )  $\delta$ : 14.3, 17.9, 19.8, 55.2, 61.0, 114.3, 114.9, 125.9, 126.7, 127.1, 131.6, 134.8, 135.8, 153.9, 159.5, 170.5; MS:  $m/z$  301  $[\text{MH}]^+$ ; HRMS calcd for  $\text{C}_{18}\text{H}_{21}\text{O}_4$ : 301.1440  $[\text{M}+\text{H}]$ , found: 301.1449.

### Ethyl 6-hydroxy-3',4'-dimethoxy-2,4-dimethylbiphenyl-3-carboxylate (**3c**)

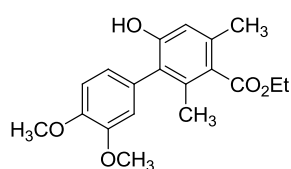

The reaction of 1-(3,4-dimethoxyphenyl)penta-3,4-dien-2-one (**1c**, 109 mg, 0.5 mmol), ethyl 3-oxobutanoate (**2a**, 78 mg, 0.6 mmol) and  $\text{Cs}_2\text{CO}_3$  (163 mg, 0.5 mmol) in  $\text{CH}_3\text{CN}$  (5 mL) afforded 135 mg (82%) of **3c**: Eluent: ethyl acetate / petroleum ether (20%); Yellow solid; Mp: 146-148 °C (ethanol);  $^1\text{H}$  NMR (400 MHz,  $\text{CDCl}_3$ )  $\delta$ : 1.37 (t,  $J = 7.2$  Hz, 3H), 2.03 (s, 3H), 2.30 (s, 3H), 3.84 (s, 3H), 3.91 (s, 1H), 4.36 (q,  $J = 6.8$  Hz, 2H), 5.08 (s, 1H), 6.68 (s, 1H), 6.72 (d,  $J = 1.2$  Hz, 1H), 6.78 (dd,  $J_1 = 8.0$  Hz,  $J_2 = 2.0$  Hz, 1H), 6.96 (d,  $J = 8.4$  Hz, 1H);  $^{13}\text{C}$  NMR (100 MHz,  $\text{CDCl}_3$ )  $\delta$ : 14.3, 17.9, 19.8, 55.9, 61.0, 111.9, 113.2, 114.2, 122.6, 125.9, 126.8, 127.2, 134.7, 135.9, 149.0, 149.7, 153.7, 170.3; MS:  $m/z$  331  $[\text{MH}]^+$ ; HRMS calcd for  $\text{C}_{19}\text{H}_{23}\text{O}_5$ : 331.1545  $[\text{M}+\text{H}]$ , found: 331.1548.

### Ethyl 4'-fluoro-6-hydroxy-2,4-dimethylbiphenyl-3-carboxylate (**3d**)

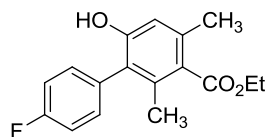

The reaction of 1-(4-fluorophenyl)penta-3,4-dien-2-one (**1d**, 88 mg, 0.5 mmol), ethyl 3-oxobutanoate (**2a**, 78 mg, 0.6 mmol) and  $\text{Cs}_2\text{CO}_3$  (163 mg, 0.5 mmol) in  $\text{CH}_3\text{CN}$  (5 mL) afforded 125 mg (87%) of **3d**: Eluent: ethyl acetate / petroleum ether (5%); Yellow solid; Mp: 87-89 °C (ethanol);  $^1\text{H}$  NMR (400 MHz,  $\text{CDCl}_3$ )  $\delta$ : 1.38 (t,  $J = 7.2$  Hz, 3H), 2.00 (s, 3H), 2.31 (s, 3H), 4.38 (q,  $J = 7.2$  Hz, 2H), 5.10 (s, 1H), 6.67 (s, 1H), 7.15-7.20 (m, 4H);  $^{13}\text{C}$  NMR (100 MHz,  $\text{CDCl}_3$ )  $\delta$ : 14.3, 17.9, 19.8, 61.0, 114.5, 116.5, 116.7, 125.1, 127.4, 130.5, 130.6, 132.3, 132.4, 134.6, 136.3, 153.5, 161.5, 163.9, 170.2; MS:  $m/z$  289  $[\text{MH}]^+$ ; HRMS calcd for  $\text{C}_{17}\text{H}_{18}\text{FO}_3$ : 289.1240  $[\text{M}+\text{H}]$ , found: 289.1243.

### Ethyl 4-benzyl-6-hydroxy-2-methylbiphenyl-3-carboxylate (**3e**)

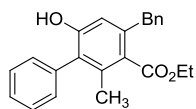

The reaction of 1,5-diphenylpenta-3,4-dien-2-one (**1e**, 117 mg, 0.5 mmol), ethyl 3-oxobutanoate (**2a**, 78 mg, 0.6 mmol) and Cs<sub>2</sub>CO<sub>3</sub> (163 mg, 0.5 mmol) in CH<sub>3</sub>CN (5

mL) afforded 149 mg (86%) of **3e**: Eluent: ethyl acetate / petroleum ether (5%); Yellow liquid; <sup>1</sup>H NMR (400 MHz, CDCl<sub>3</sub>) δ: 1.27 (t, *J* = 7.2 Hz, 3H), 2.03 (s, 3H), 4.01 (s, 2H), 4.26 (q, *J* = 7.6 Hz, 2H), 4.85 (s, 1H), 6.66 (s, 1H), 7.21-7.32 (m, 7H), 7.41-7.45 (m, 1H), 7.51 (t, *J* = 7.2 Hz, 2H); <sup>13</sup>C NMR (100 MHz, CDCl<sub>3</sub>) δ: 14.1, 18.0, 39.4, 61.0, 114.4, 126.3, 126.7, 127.3, 128.5, 129.2, 129.6, 130.4, 130.5, 134.5, 134.6, 139.2, 139.9, 153.5, 170.2; MS: *m/z* 347 [MH]<sup>+</sup>; HRMS calcd for C<sub>23</sub>H<sub>23</sub>O<sub>3</sub>: 347.1647 [M+H], found: 347.1650.

#### Ethyl 4-benzyl-6-hydroxy-4'-methoxy-2-methylbiphenyl-3-carboxylate (**3f**)

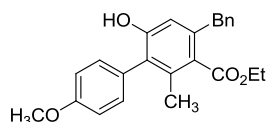

The reaction of 1-(4-methoxyphenyl)-5-phenylpenta-3,4-dien-2-one (**1f**, 132 mg, 0.5 mmol), ethyl 3-oxobutanoate (**2a**, 78 mg, 0.6 mmol) and Cs<sub>2</sub>CO<sub>3</sub> (163 mg, 0.5

mmol) in CH<sub>3</sub>CN (5 mL) afforded 158 mg (84%) of **3f**: Eluent: ethyl acetate / petroleum ether (5%); Yellow liquid; <sup>1</sup>H NMR (400 MHz, CDCl<sub>3</sub>) δ: 1.28 (t, *J* = 6.8 Hz, 3H), 2.03 (s, 3H), 3.85 (s, 3H), 3.99 (s, 2H), 4.25 (q, *J* = 6.8 Hz, 2H), 4.94 (s, 1H), 6.64 (s, 1H), 7.01-7.03 (m, 3H), 7.15-7.23 (m, 4H), 7.28 (d, *J* = 7.2 Hz, 1H), 7.30 (d, *J* = 6.8 Hz, 1H); <sup>13</sup>C NMR (100 MHz, CDCl<sub>3</sub>) δ: 14.2, 17.9, 39.3, 55.3, 61.0, 114.17, 114.20, 115.0, 126.2, 126.3, 128.4, 129.1, 131.6, 134.9, 138.9, 139.9, 153.7, 153.8, 159.6, 170.2; MS: *m/z* 377 [MH]<sup>+</sup>; HRMS calcd for C<sub>24</sub>H<sub>25</sub>O<sub>4</sub>: 377.1753 [M+H], found: 377.1760.

#### Ethyl 4-benzyl-6-hydroxy-3',4'-dimethoxy-2-methylbiphenyl-3-carboxylate (**3g**)

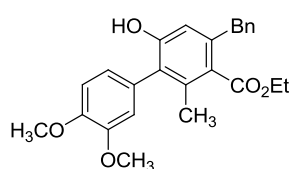

The reaction of 1-(3,4-dimethoxyphenyl)-5-phenylpenta-3,4-dien-2-one (**1g**, 147 mg, 0.5 mmol), ethyl 3-oxobutanoate (**2a**, 78 mg, 0.6 mmol) and Cs<sub>2</sub>CO<sub>3</sub> (163 mg, 0.5 mmol) in CH<sub>3</sub>CN (5 mL) afforded 166 mg (82%) of **3g**: Eluent: ethyl

acetate / petroleum ether (20%); Syrup; <sup>1</sup>H NMR (400 MHz, CDCl<sub>3</sub>) δ: 1.25 (t, *J* = 7.2 Hz, 3H), 2.04 (s, 3H), 3.86 (s, 3H), 3.93 (s, 3H), 3.99 (s, 2H), 4.24 (q, *J* = 6.8 Hz, 2H), 5.05 (s, 1H), 6.65 (s, 1H), 6.73 (s,

1H), 6.79-6.81 (m, 1H), 6.98 (d,  $J = 8.4$  Hz, 1H), 7.21 (d,  $J = 7.6$  Hz, 3H), 7.27 (d,  $J = 7.6$  Hz, 2H);  $^{13}\text{C}$  NMR (100 MHz,  $\text{CDCl}_3$ )  $\delta$ : 14.1, 17.9, 39.3, 55.87, 55.90, 61.0, 111.9, 113.1, 114.2, 122.5, 126.2, 127.1, 128.4, 129.1, 134.8, 139.0, 139.9, 149.0, 149.7, 153.8, 170.2; MS:  $m/z$  407  $[\text{MH}]^+$ ; HRMS calcd for  $\text{C}_{25}\text{H}_{27}\text{O}_5$ : 407.1858  $[\text{M}+\text{H}]$ , found: 407.1862.

### Ethyl 6-hydroxy-3',4'-dimethoxy-2-methyl-4-(2-(trifluoromethyl)benzyl)biphenyl-3-carboxylate

(3h)

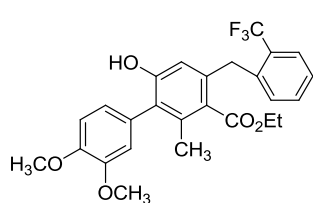

The reaction of 1-(3,4-dimethoxyphenyl)-5-(4-trifluorophenyl)-penta-3,4-dien-2-one (**1h**, 181 mg, 0.5 mmol), ethyl 3-oxobutanoate (**2a**, 78 mg, 0.6 mmol) and  $\text{Cs}_2\text{CO}_3$  (163 mg, 0.5 mmol) in  $\text{CH}_3\text{CN}$  (5 mL) afforded 189 mg (80%) of

**3h**: Eluent: ethyl acetate / petroleum ether (20%); Yellow liquid;  $^1\text{H}$  NMR (400 MHz,  $\text{CDCl}_3$ )  $\delta$ : 1.21 (t,  $J = 6.8$  Hz, 3H), 2.08 (s, 3H), 3.86 (s, 3H), 3.92 (s, 3H), 4.18 (s, 2H), 4.26 (q,  $J = 7.2$  Hz, 2H), 5.08 (s, 1H), 6.48 (s, 1H), 6.75 (d,  $J = 2.0$  Hz, 1H), 6.82 (dd,  $J_1 = 8.0$  Hz,  $J_2 = 2.0$  Hz, 1H), 6.99 (d,  $J = 8.0$  Hz, 1H), 7.20 (d,  $J = 8.0$  Hz, 1H), 7.32 (t,  $J = 7.6$  Hz, 1H), 7.44 (t,  $J = 7.2$  Hz, 1H), 7.65 (d,  $J = 7.2$  Hz, 1H);  $^{13}\text{C}$  NMR (100 MHz,  $\text{CDCl}_3$ )  $\delta$ : 13.9, 18.0, 35.2, 55.86, 55.91, 61.1, 111.9, 113.1, 114.3, 122.5, 125.7, 125.8, 126.3, 126.5, 126.7, 127.5, 131.6, 131.8, 135.0, 137.5, 138.4, 149.0, 149.7, 153.9, 170.0; MS:  $m/z$  475  $[\text{MH}]^+$ ; HRMS calcd for  $\text{C}_{26}\text{H}_{26}\text{F}_3\text{O}_5$ : 475.1732  $[\text{M}+\text{H}]$ , found: 475.1739.

### Ethyl 6-hydroxy-2,4,5-trimethylbiphenyl-3-carboxylate (3i)

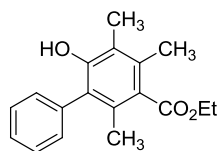

The reaction of 3-methyl-1-phenylpenta-3,4-dien-2-one (**1i**, 86 mg, 0.5 mmol), ethyl 3-oxobutanoate (**2a**, 78 mg, 0.6 mmol) and  $\text{Cs}_2\text{CO}_3$  (163 mg, 0.5 mmol) in  $\text{CH}_3\text{CN}$  (5

mL) afforded 118 mg (83%) of **3i**: Eluent: ethyl acetate / petroleum ether (5%); Yellow liquid;  $^1\text{H}$  NMR (400 MHz,  $\text{CDCl}_3$ )  $\delta$ : 1.39 (t,  $J = 7.2$  Hz, 3H), 1.97 (s, 3H), 2.19 (s, 3H), 2.27 (s, 3H), 4.39 (q,  $J = 7.2$  Hz, 2H), 4.85 (s, 1H), 7.25 (dd,  $J_1 = 8.0$  Hz,  $J_2 = 1.2$  Hz, 2H), 7.42-7.45 (m, 1H), 7.49-7.53 (m, 2H);  $^{13}\text{C}$  NMR (100 MHz,  $\text{CDCl}_3$ )  $\delta$ : 11.9, 14.3, 17.0, 17.5, 61.0, 120.7, 125.7, 127.7, 128.4, 129.6, 130.2, 130.5,

133.7, 135.2, 151.3, 171.0; MS: m/z 285 [MH]<sup>+</sup>; HRMS calcd for C<sub>18</sub>H<sub>21</sub>O<sub>3</sub>: 285.1491 [M+H], found: 285.1496.

### Ethyl 5-ethyl-6-hydroxy-2,4-dimethylbiphenyl-3-carboxylate (**3j**)

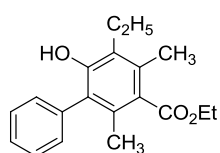

The reaction of 3-ethyl-1-phenylpenta-3,4-dien-2-one (**1j**, 93 mg, 0.5 mmol), ethyl 3-oxobutanoate (**2a**, 78 mg, 0.6 mmol) and Cs<sub>2</sub>CO<sub>3</sub> (163 mg, 0.5 mmol) in CH<sub>3</sub>CN (5 mL) afforded 122 mg (82%) of **3j**: Eluent: ethyl acetate / petroleum ether (5%); Syrup;

<sup>1</sup>H NMR (400 MHz, CDCl<sub>3</sub>) δ: 1.17 (t, *J* = 7.6 Hz, 3H), 1.42 (t, *J* = 7.2 Hz, 3H), 2.01 (s, 3H), 2.34 (s, 3H), 2.74 (q, *J* = 7.6 Hz, 2H), 4.43 (q, *J* = 7.2 Hz, 2H), 4.87 (s, 1H), 7.30 (dd, *J*<sub>1</sub> = 7.6 Hz, *J*<sub>2</sub> = 1.6 Hz, 2H), 7.45 (t, *J* = 7.2 Hz, 1H), 7.52 (t, *J* = 7.6 Hz, 2H); <sup>13</sup>C NMR (100 MHz, CDCl<sub>3</sub>) δ: 13.4, 14.3, 16.1, 17.5, 19.7, 60.9, 125.9, 126.8, 127.9, 128.4, 129.6, 130.4, 130.6, 132.9, 135.1, 151.2, 171.0; MS: m/z 299 [MH]<sup>+</sup>; HRMS calcd for C<sub>19</sub>H<sub>23</sub>O<sub>3</sub>: 299.1647 [M+H], found: 299.1651.

### 6-Hydroxy-8-methyl-5-(thiophen-2-yl)-3,4-dihydronaphthalen-1(2H)-one (**3k**)

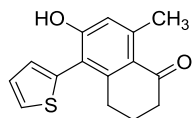

The reaction of 1-(thiophen-2-yl)penta-3,4-dien-2-one (**1k**, 82 mg, 0.5 mmol), cyclohexane-1,3-dione (**2b**, 67 mg, 0.6 mmol) and Cs<sub>2</sub>CO<sub>3</sub> (163 mg, 0.5 mmol) in

CH<sub>3</sub>CN (5 mL) afforded 101 mg (78%) of **3k**: Eluent: ethyl acetate / petroleum ether (10%); Yellow solid; Mp: 164-165 °C (ethanol); <sup>1</sup>H NMR (400 MHz, CDCl<sub>3</sub>) δ: 1.92-1.97 (m, 2H), 2.57 (t, *J* = 6.8 Hz, 2H), 2.66 (s, 3H), 2.70 (t, *J* = 6.4 Hz, 2H), 5.99 (s, 1H), 6.77 (s, 1H), 7.01 (d, *J* = 3.2 Hz, 1H), 7.18-7.20 (m, 1H), 7.52 (d, *J* = 5.2 Hz, 1H); <sup>13</sup>C NMR (100 MHz, CDCl<sub>3</sub>) δ: 22.6, 23.9, 29.4, 40.3, 117.0, 117.2, 125.1, 128.0, 128.3, 129.2, 134.3, 145.2, 147.8, 157.2, 199.3; MS: m/z 259 [MH]<sup>+</sup>; HRMS calcd for C<sub>15</sub>H<sub>14</sub>O<sub>2</sub>S: 259.0793 [M+H], found: 259.0798.

### 6-Hydroxy-8-methyl-3,5-diphenyl-3,4-dihydronaphthalen-1(2H)-one (**3l**)



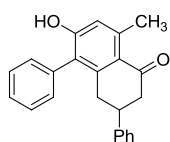

The reaction of 1-phenylpenta-3,4-dien-2-one (**1a**, 79 mg, 0.5 mmol), 5-phenylcyclohexane-1,3-dione (**2c**, 113 mg, 0.6 mmol) and Cs<sub>2</sub>CO<sub>3</sub> (163 mg, 0.5 mmol) in CH<sub>3</sub>CN (5 mL) afforded 133 mg (81%) of **3l**: Eluent: ethyl acetate / petroleum ether

(20%); Yellow solid; Mp: 184-185 °C (ethanol); <sup>1</sup>H NMR (400 MHz, CDCl<sub>3</sub>) δ: 2.72 (s, 3H), 2.75-2.90 (m, 4H), 3.26-3.30 (m, 1H), 5.30 (s, 1H), 6.82 (s, 1H), 7.17 (d, *J* = 7.6 Hz, 2H), 7.22 (d, *J* = 7.2 Hz, 2H), 7.26-7.31 (m, 3H), 7.42 (t, *J* = 7.6 Hz, 1H), 7.47-7.52 (m, 2H); <sup>13</sup>C NMR (100 MHz, CDCl<sub>3</sub>) δ: 23.9, 37.0, 40.6, 47.4, 117.7, 124.5, 125.3, 126.8, 128.7, 129.7, 129.8, 129.9, 130.8, 134.2, 143.6, 144.2, 144.8, 156.4, 198.8; MS: *m/z* 329 [MH]<sup>+</sup>; HRMS calcd for C<sub>23</sub>H<sub>21</sub>O<sub>2</sub>: 329.1542 [M+H], found: 329.1549.

### 5-(3,4-Dimethoxyphenyl)-6-hydroxy-8-methyl-3-phenyl-3,4-dihydronaphthalen-1(2H)-one (**3m**)

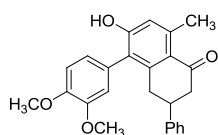

The reaction of 1-(3,4-dimethoxyphenyl)penta-3,4-dien-2-one (**1c**, 109 mg, 0.5 mmol), 5-phenylcyclohexane-1,3-dione (**2c**, 113 mg, 0.6 mmol) and Cs<sub>2</sub>CO<sub>3</sub> (163 mg, 0.5 mmol) in CH<sub>3</sub>CN (5 mL) afforded 149 mg (77%) of **3m**: Eluent: ethyl acetate /

petroleum ether (20%); Yellow solid; Mp: 202-204 °C (ethanol); <sup>1</sup>H NMR (400 MHz, CDCl<sub>3</sub>) δ: 2.71 (s, 3H), 2.74-2.89 (m, 4H), 3.25-3.31 (m, 1H), 3.87 (s, 3H), 3.90 (s, 3H), 5.50 (d, *J* = 4.4 Hz, 1H), 6.68-6.84 (m, 3H), 6.96 (t, *J* = 7.6 Hz, 1H), 7.16-7.31 (m, 5H); <sup>13</sup>C NMR (100 MHz, CDCl<sub>3</sub>) δ: 23.9, 37.1, 40.5, 47.2, 55.9, 56.0, 112.2, 112.5, 113.4, 117.4, 122.1, 123.2, 124.5, 125.1, 125.9, 126.7, 128.7, 143.6, 144.1, 149.1, 149.9, 156.5, 198.7; MS: *m/z* 389 [MH]<sup>+</sup>; HRMS calcd for C<sub>25</sub>H<sub>25</sub>O<sub>4</sub>: 389.1753 [M+H], found: 389.1756.

### 6-Hydroxy-7,8-dimethyl-3,5-diphenyl-3,4-dihydronaphthalen-1(2H)-one (**3n**)

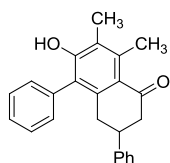

The reaction of 3-methyl-1-phenylpenta-3,4-dien-2-one (**1i**, 86 mg, 0.5 mmol), 5-phenylcyclohexane-1,3-dione (**2c**, 113 mg, 0.6 mmol) and Cs<sub>2</sub>CO<sub>3</sub> (163 mg, 0.5 mmol) in CH<sub>3</sub>CN (5 mL) afforded 138 mg (81%) of **3n**: Eluent: ethyl acetate / petroleum ether

(5%); Yellow solid; Mp: 140-142 °C (ethanol); <sup>1</sup>H NMR (400 MHz, CDCl<sub>3</sub>) δ: 2.31 (s, 3H), 2.71 (s, 3H),

2.75-2.99 (m, 4H), 3.28-3.31 (m, 1H), 5.39 (s, 1H), 7.20-7.26 (m, 4H), 7.29-7.35 (m, 3H), 7.44 (t,  $J = 8.0$  Hz, 1H), 7.49-7.54 (m, 2H);  $^{13}\text{C}$  NMR (100 MHz,  $\text{CDCl}_3$ )  $\delta$ : 12.1, 18.2, 36.8, 40.7, 47.8, 123.2, 124.4, 125.2, 126.77, 126.80, 128.8, 129.99, 130.04, 131.1, 134.5, 141.2, 142.0, 143.8, 154.4, 199.3; MS:  $m/z$  343  $[\text{MH}]^+$ ; HRMS calcd for  $\text{C}_{24}\text{H}_{23}\text{O}_2$ : 343.1698  $[\text{M}+\text{H}]$ , found: 343.1702.

#### 4,6-Dimethylbiphenyl-2-ol (3o)

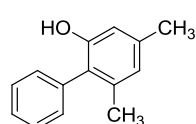

The reaction of 1-phenylpenta-3,4-dien-2-one (**1a**, 79 mg, 0.5 mmol), pentane-2,4-dione (**2d**, 60 mg, 0.6 mmol) and  $\text{Cs}_2\text{CO}_3$  (163 mg, 0.5 mmol) in  $\text{CH}_3\text{CN}$  (5 mL) afforded 79 mg (80%) of **3o**: Eluent: ethyl acetate / petroleum ether (5%); Yellow liquid;  $^1\text{H}$  NMR (400 MHz,  $\text{CDCl}_3$ )  $\delta$ : 2.06 (s, 3H), 2.34 (s, 3H), 4.75 (s, 1H), 6.71 (d,  $J = 2.8$  Hz, 1H), 7.29-7.31 (m, 2H), 7.40-7.44 (m, 1H), 7.49-7.52 (m, 2H);  $^{13}\text{C}$  NMR (100 MHz,  $\text{CDCl}_3$ )  $\delta$ : 20.3, 21.2, 113.3, 122.9, 125.3, 128.1, 129.4, 130.5, 135.4, 137.0, 138.6, 152.7; MS:  $m/z$  199  $[\text{MH}]^+$ ; HRMS calcd for  $\text{C}_{14}\text{H}_{15}\text{O}$ : 199.1123  $[\text{M}+\text{H}]$ , found: 199.1127.

#### 4,4',6-Trimethylbiphenyl-2-ol (3p)

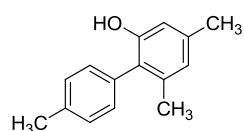

The reaction of 1-*p*-tolylpenta-3,4-dien-2-one (**1l**, 86 mg, 0.5 mmol), pentane-2,4-dione (**2d**, 60 mg, 0.6 mmol) and  $\text{Cs}_2\text{CO}_3$  (163 mg, 0.5 mmol) in  $\text{CH}_3\text{CN}$  (5 mL) afforded 88 mg (83%) of **3p**: Eluent: ethyl acetate / petroleum ether (5%); Yellow liquid;  $^1\text{H}$  NMR (400 MHz,  $\text{CDCl}_3$ )  $\delta$ : 2.09 (s, 3H), 2.36 (s, 3H), 2.45 (s, 3H), 4.83 (s, 1H), 6.72 (s, 2H), 7.20 (d,  $J = 7.6$  Hz, 2H), 7.33 (d,  $J = 7.6$  Hz, 2H);  $^{13}\text{C}$  NMR (100 MHz,  $\text{CDCl}_3$ )  $\delta$ : 20.4, 21.26, 21.31, 113.2, 122.9, 125.3, 130.2, 130.4, 132.2, 137.1, 137.8, 138.4, 152.9; MS:  $m/z$  213  $[\text{MH}]^+$ ; HRMS calcd for  $\text{C}_{15}\text{H}_{17}\text{O}$ : 213.1279  $[\text{M}+\text{H}]$ , found: 213.1286.

#### 4'-Methoxy-4,6-dimethylbiphenyl-2-ol (3q)

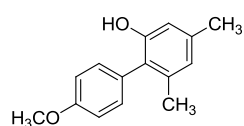

The reaction of 1-(4-methoxyphenyl)penta-3,4-dien-2-one (**1b**, 94 mg, 0.5 mmol), pentane-2,4-dione (**2d**, 60 mg, 0.6 mmol) and  $\text{Cs}_2\text{CO}_3$  (163 mg, 0.5 mmol) in

CH<sub>3</sub>CN (5 mL) afforded 92 mg (81%) of **3q**: Eluent: ethyl acetate / petroleum ether (5%); Yellow liquid; <sup>1</sup>H NMR (400 MHz, CDCl<sub>3</sub>) δ: 2.08 (s, 3H), 2.35 (s, 3H), 3.87 (s, 3H), 4.98 (s, 1H), 6.71 (s, 2H), 7.03-7.05 (m, 2H), 7.22 (dd, *J*<sub>1</sub> = 6.8 Hz, *J*<sub>2</sub> = 2.0 Hz, 2H); <sup>13</sup>C NMR (100 MHz, CDCl<sub>3</sub>) δ: 20.4, 21.2, 55.3, 113.2, 114.4, 114.8, 122.8, 125.0, 127.4, 131.6, 132.1, 137.3, 138.3, 153.1, 159.3; MS: *m/z* 229 [MH]<sup>+</sup>; HRMS calcd for C<sub>15</sub>H<sub>17</sub>O<sub>2</sub>:229.1229 [M+H], found: 229.1233.

### 3',4'-Dimethoxy-4,6-dimethylbiphenyl-2-ol (**3r**)

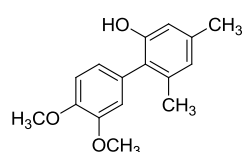

The reaction of 1-(3,4-dimethoxyphenyl)penta-3,4-dien-2-one (**1c**, 109 mg, 0.5 mmol), pentane-2,4-dione (**2d**, 60 mg, 0.6 mmol) and Cs<sub>2</sub>CO<sub>3</sub> (163 mg, 0.5 mmol) in

CH<sub>3</sub>CN (5 mL) afforded 102 mg (79%) of **3r**: Eluent: ethyl acetate / petroleum ether (5%); Yellow solid; Mp: 143-144 °C (ethanol); <sup>1</sup>H NMR (400 MHz, CDCl<sub>3</sub>) δ: 2.06 (s, 3H), 2.31 (s, 3H), 3.86 (s, 3H), 3.92 (s, 3H), 4.94 (s, 1H), 6.67 (s, 2H), 6.77 (d, *J* = 1.2 Hz, 1H), 6.82 (dd, *J*<sub>1</sub> = 7.2 Hz, *J*<sub>2</sub> = 2.4 Hz, 1H), 6.97 (d, *J* = 8.4 Hz, 1H); <sup>13</sup>C NMR (100 MHz, CDCl<sub>3</sub>) δ: 20.3, 21.2, 56.0, 56.2, 111.8, 113.1, 113.3, 122.6, 125.1, 127.0, 127.5, 137.2, 138.5, 148.7, 149.6, 153.0; MS: *m/z* 259 [MH]<sup>+</sup>; HRMS calcd for C<sub>16</sub>H<sub>19</sub>O<sub>3</sub>:259.1334 [M+H], found: 259.1339.

### 3-Ethyl-4,6-dimethylbiphenyl-2-ol (**3s**)

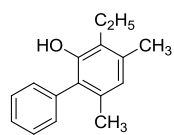

The reaction of 3-ethyl-1-phenylpenta-3,4-dien-2-one (**1j**, 93 mg, 0.5 mmol), pentane-2,4-dione (**2d**, 60 mg, 0.6 mmol) and Cs<sub>2</sub>CO<sub>3</sub> (163 mg, 0.5 mmol) in CH<sub>3</sub>CN (5

mL) afforded 93 mg (82%) of **3s**: Eluent: ethyl acetate / petroleum ether (5%); Yellow liquid; <sup>1</sup>H NMR (400 MHz, CDCl<sub>3</sub>) δ: 1.31 (t, *J* = 7.2 Hz, 3H), 2.14 (s, 3H), 2.46 (s, 3H), 2.82 (q, *J* = 7.2 Hz, 2H), 4.87 (s, 1H), 6.82 (s, 1H), 7.42 (d, *J* = 7.2 Hz, 2H), 7.50-7.53 (m, 1H), 7.60 (t, *J* = 7.2 Hz, 2H); <sup>13</sup>C NMR (100 MHz, CDCl<sub>3</sub>) δ: 13.7, 19.2, 19.9, 20.1, 123.5, 125.7, 126.3, 128.1, 129.5, 130.6, 133.6, 136.0, 136.4, 150.6; MS: *m/z* 227 [MH]<sup>+</sup>; HRMS calcd for C<sub>16</sub>H<sub>19</sub>O:227.1436 [M+H], found: 227.1439.

### 6-Hydroxy-2,4-dimethylbiphenyl-3-carbonitrile (**3t**)

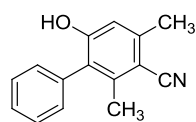

The reaction of 1-phenylpenta-3,4-dien-2-one (**1a**, 79 mg, 0.5 mmol), 3-oxobutanenitrile (**2e**, 50 mg, 0.6 mmol) and  $\text{Cs}_2\text{CO}_3$  (163 mg, 0.5 mmol) in  $\text{CH}_3\text{CN}$  (5 mL) afforded 86 mg (78%) of **3t**: Eluent: ethyl acetate / petroleum ether (10%); Yellow solid; Mp: 219-220 °C (ethanol);  $^1\text{H}$  NMR (400 MHz,  $\text{CDCl}_3$ )  $\delta$ : 2.24 (s, 3H), 2.52 (s, 3H), 6.78 (s, 1H), 7.23 (d,  $J = 8.0$  Hz, 2H), 7.46-7.53 (m, 3H);  $^{13}\text{C}$  NMR (100 MHz,  $\text{CDCl}_3$ )  $\delta$ : 19.3, 20.8, 105.8, 114.7, 118.0, 126.7, 128.9, 129.8, 130.3, 133.6, 142.0, 143.5, 156.2; MS:  $m/z$  224  $[\text{MH}]^+$ ; HRMS calcd for  $\text{C}_{15}\text{H}_{14}\text{NO}$ : 224.1075  $[\text{M}+\text{H}]$ , found: 224.1078.

### 6-Hydroxy-2,4,5-trimethylbiphenyl-3-carbonitrile (**3u**)

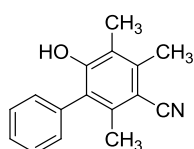

The reaction of 3-methyl-1-phenylpenta-3,4-dien-2-one (**1i**, 86 mg, 0.5 mmol), 3-oxobutanenitrile (**2e**, 50 mg, 0.6 mmol) and  $\text{Cs}_2\text{CO}_3$  (163 mg, 0.5 mmol) in  $\text{CH}_3\text{CN}$  (5 mL) afforded 101 mg (85%) of **3u**: Eluent: ethyl acetate / petroleum ether (5%); White solid; Mp: 142-143 °C (ethanol);  $^1\text{H}$  NMR (400 MHz,  $\text{CDCl}_3$ )  $\delta$ : 2.21 (s, 3H), 2.22 (s, 3H), 2.52 (s, 3H), 5.25 (s, 1H), 7.23-7.28 (m, 2H), 7.48-7.56 (m, 3H);  $^{13}\text{C}$  NMR (100 MHz,  $\text{CDCl}_3$ )  $\delta$ : 12.1, 18.5, 19.1, 105.9, 118.7, 121.6, 126.3, 129.0, 129.9, 130.3, 134.0, 138.5, 141.5, 154.1; MS:  $m/z$  238  $[\text{MH}]^+$ ; HRMS calcd for  $\text{C}_{16}\text{H}_{16}\text{NO}$ : 238.1232  $[\text{M}+\text{H}]$ , found: 238.1237.

## 3. Experimental procedures for the synthesis and spectroscopic data of 4

### Ethyl 1,3-dimethyl-6-oxo-6H-benzo[*c*]chromene-2-carboxylate (**4a**)

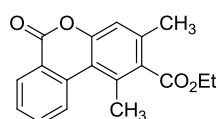

**Typical procedure:** To a flask containing 1-phenylpenta-3,4-dien-2-one (**1a**, 32 mg, 0.2 mmol) and ethyl 3-oxobutanoate (**2a**, 31 mg, 0.24 mmol) were added  $\text{CH}_3\text{CN}$  (4 mL),  $\text{Cs}_2\text{CO}_3$  (65 mg, 0.2 mmol), and anhydrous  $\text{Na}_2\text{SO}_4$  (28 mg, 0.2 mmol). The mixture was stirred at 80 °C for 4 h. At this stage,  $\text{Pd}(\text{OAc})_2$  (4.5 mg, 0.02 mmol) and  $\text{AgOAc}$  (100 mg, 0.6 mmol) were added and the resulting mixture was stirred at 80 °C under CO (1atm). Upon completion as monitored by TLC,

the reaction was quenched with aqueous  $\text{NH}_4\text{Cl}$ . The mixture was filtered on diatomite and the filtrate was extracted with ethyl acetate (5 mL  $\times$  3). The combined organic layer was washed with water and brine, and then dried over anhydrous  $\text{Na}_2\text{SO}_4$ . The solvent was evaporated under vacuum and the crude product was purified by chromatography on silica-gel (petroleum ether / ethyl acetate = 20:1) to afford 40 mg (68%) of **4a**: Yellow solid; Mp: 145-147 °C (ethyl acetate);  $^1\text{H}$  NMR (400 MHz,  $\text{CDCl}_3$ )  $\delta$ : 1.45 (t,  $J$  = 7.2 Hz, 3H), 2.40 (s, 3H), 2.79 (s, 3H), 4.47 (q,  $J$  = 7.2 Hz, 2H), 7.14 (s, 1H), 7.61 (t,  $J$  = 7.2 Hz, 1H), 7.81-7.85 (m, 1 H), 8.29 (d,  $J$  = 8.0 Hz, 1H), 8.49 (d,  $J$  = 7.6 Hz, 1H);  $^{13}\text{C}$  NMR (100 MHz,  $\text{CDCl}_3$ )  $\delta$ : 14.3, 19.6, 21.8, 61.5, 115.7, 117.1, 122.2, 126.4, 128.2, 130.9, 132.8, 133.8, 134.2, 135.4, 136.8, 151.9, 161.0, 169.7; MS:  $m/z$  297  $[\text{MH}]^+$ ; HRMS calcd for  $\text{C}_{18}\text{H}_{17}\text{O}_4$ : 297.1127  $[\text{M}+\text{H}]$ , found: 297.1131.

#### Ethyl 8-methoxy-1,3-dimethyl-6-oxo-6H-benzo[*c*]chromene-2-carboxylate (**4b**)

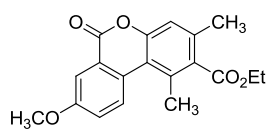

The reaction of 1-(4-methoxyphenyl)penta-3,4-dien-2-one (**1b**, 38 mg, 0.2 mmol), ethyl 3-oxobutanoate (**2a**, 31 mg, 0.24 mmol),  $\text{Cs}_2\text{CO}_3$  (65 mg, 0.2 mmol), anhydrous  $\text{Na}_2\text{SO}_4$  (28 mg, 0.2 mmol),  $\text{Pd}(\text{OAc})_2$  (4.5 mg, 0.02 mmol) and  $\text{AgOAc}$  (100 mg, 0.6 mmol) in  $\text{CH}_3\text{CN}$  (4 mL) under CO (1atm) afforded 48 mg (74%) of **4b**: Eluent: ethyl acetate / petroleum ether (10%); Yellow solid; Mp: 178-179 °C (ethyl acetate);  $^1\text{H}$  NMR (400 MHz,  $\text{CDCl}_3$ )  $\delta$ : 1.43 (t,  $J$  = 7.2 Hz, 3H), 2.38 (s, 3H), 2.75 (s, 3H), 3.94 (s, 3H), 4.45 (q,  $J$  = 7.2 Hz, 2H), 7.11 (s, 1H), 7.36-7.39 (m, 1H), 7.90 (d,  $J$  = 3.2 Hz, 1H), 8.22 (d,  $J$  = 8.8 Hz, 1H);  $^{13}\text{C}$  NMR (100 MHz,  $\text{CDCl}_3$ )  $\delta$ : 14.3, 19.5, 21.8, 55.7, 61.5, 112.0, 115.7, 117.0, 122.9, 123.5, 127.9, 128.6, 131.9, 133.6, 135.5, 150.9, 159.0, 161.0, 169.7; MS:  $m/z$  327  $[\text{MH}]^+$ ; HRMS calcd for  $\text{C}_{19}\text{H}_{19}\text{O}_5$ : 327.1232  $[\text{M}+\text{H}]$ , found: 327.1236.

#### Ethyl 8,9-dimethoxy-1,3-dimethyl-6-oxo-6H-benzo[*c*]chromene-2-carboxylate (**4c**)

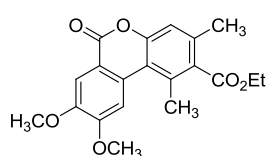

The reaction of 1-(3,4-dimethoxyphenyl)penta-3,4-dien-2-one (**1c**, 44 mg, 0.2 mmol), ethyl 3-oxobutanoate (**2a**, 31 mg, 0.24 mmol),  $\text{Cs}_2\text{CO}_3$  (65 mg, 0.2 mmol), anhydrous  $\text{Na}_2\text{SO}_4$  (28 mg, 0.2 mmol),  $\text{Pd}(\text{OAc})_2$  (4.5 mg, 0.02 mmol) and  $\text{AgOAc}$

(100 mg, 0.6 mmol) in CH<sub>3</sub>CN (4 mL) under CO (1atm) afforded 52 mg (73%) of **4c**: Eluent: ethyl acetate / petroleum ether (20%); Yellow solid; Mp: 200-201 °C (ethyl acetate); <sup>1</sup>H NMR (400 MHz, CDCl<sub>3</sub>) δ: 1.43 (t, *J* = 7.2 Hz, 3H), 2.38 (s, 3H), 2.80 (s, 3H), 4.02 (s, 3H), 4.04 (s, 3H), 4.45 (q, *J* = 7.2 Hz, 2H), 7.11 (s, 1H), 7.71 (s, 1H), 7.83 (s, 1H); <sup>13</sup>C NMR (100 MHz, CDCl<sub>3</sub>) δ: 14.3, 19.5, 21.7, 56.11, 56.13, 61.5, 108.1, 110.8, 115.3, 115.5, 117.1, 130.3, 131.4, 133.6, 135.7, 148.9, 151.5, 153.8, 160.7, 169.7; MS: *m/z* 357 [MH]<sup>+</sup>; HRMS calcd for C<sub>20</sub>H<sub>21</sub>O<sub>6</sub>: 357.1338 [M+H], found: 357.1342.

#### Ethyl 8-fluoro-1,3-dimethyl-6-oxo-6*H*-benzo[*c*]chromene-2-carboxylate (**4d**)

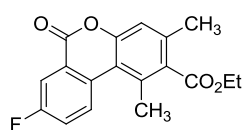

The reaction of 1-(4-fluorophenyl)penta-3,4-dien-2-one (**1d**, 35 mg, 0.2 mmol), ethyl 3-oxobutanoate (**2a**, 31 mg, 0.24 mmol), Cs<sub>2</sub>CO<sub>3</sub> (65 mg, 0.2 mmol), anhydrous Na<sub>2</sub>SO<sub>4</sub> (28 mg, 0.2 mmol), Pd(OAc)<sub>2</sub> (4.5 mg, 0.02 mmol) and AgOAc (100 mg, 0.6 mmol) in CH<sub>3</sub>CN (4 mL) under CO (1atm) afforded 36 mg (58%) of **4d**: Eluent: ethyl acetate / petroleum ether (10%); Yellow solid; Mp: 181-183 °C (ethyl acetate); <sup>1</sup>H NMR (400 MHz, CDCl<sub>3</sub>) δ: 1.43 (t, *J* = 7.2 Hz, 3H), 2.39 (s, 3H), 2.75 (s, 3H), 4.46 (q, *J* = 7.2 Hz, 2H), 7.13 (s, 1H), 7.51-7.56 (m, 1H), 8.12-8.14 (m, 1H), 8.28-8.32 (m, 1H); <sup>13</sup>C NMR (100 MHz, CDCl<sub>3</sub>) δ: 14.3, 19.6, 21.8, 61.6, 115.1, 116.5, 116.8, 117.2, 122.0, 122.2, 124.3, 124.4, 128.7, 128.8, 131.9, 132.0, 132.4, 134.0, 136.8, 151.4, 160.09, 160.12, 160.4, 162.9, 169.6; MS: *m/z* 315 [MH]<sup>+</sup>; HRMS calcd for C<sub>18</sub>H<sub>16</sub>FO<sub>4</sub>: 315.1033 [M+H], found: 315.1036.

#### Ethyl 3-benzyl-8-methoxy-1-methyl-6-oxo-6*H*-benzo[*c*]chromene-2-carboxylate (**4e**)

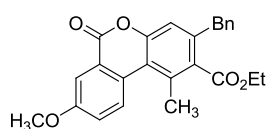

The reaction of 1-(4-methoxyphenyl)-5-phenylpenta-3,4-dien-2-one (**1e**, 53 mg, 0.2 mmol), ethyl 3-oxobutanoate (**2a**, 31 mg, 0.24 mmol), Cs<sub>2</sub>CO<sub>3</sub> (65 mg, 0.2 mmol), anhydrous Na<sub>2</sub>SO<sub>4</sub> (28 mg, 0.2 mmol), Pd(OAc)<sub>2</sub> (4.5 mg, 0.02 mmol) and AgOAc (100 mg, 0.6 mmol) in CH<sub>3</sub>CN (4 mL) under CO (1atm) afforded 60 mg (75%) of **4e**: Eluent: ethyl acetate / petroleum ether (10%); Yellow solid; Mp: 124-125 °C (ethyl acetate); <sup>1</sup>H NMR (400 MHz, CDCl<sub>3</sub>) δ: 1.30 (t, *J* = 7.2 Hz, 3H), 2.76 (s, 3H), 3.95 (s, 3H), 4.04 (s, 2H), 4.31 (q, *J* = 7.2 Hz, 2H), 7.02 (s, 1H), 7.04-7.32 (m, 5H),

7.38 (dd,  $J_1 = 9.2$  Hz,  $J_2 = 2.8$  Hz, 1H), 7.90 (d,  $J = 3.2$  Hz, 1H), 8.23 (d,  $J = 9.2$  Hz, 1H);  $^{13}\text{C}$  NMR (100 MHz,  $\text{CDCl}_3$ )  $\delta$ : 14.1, 21.9, 39.1, 55.8, 61.5, 112.1, 116.4, 117.1, 123.0, 123.7, 126.6, 128.2, 128.57, 128.63, 129.2, 132.3, 133.4, 138.85, 138.88, 151.2, 159.2, 161.0, 169.7; MS:  $m/z$  403  $[\text{MH}]^+$ ; HRMS calcd for  $\text{C}_{25}\text{H}_{23}\text{O}_5$ : 403.1545  $[\text{M}+\text{H}]$ , found: 403.1548.

#### Ethyl 1,3,4-trimethyl-6-oxo-6H-benzo[*c*]chromene-2-carboxylate (**4f**)

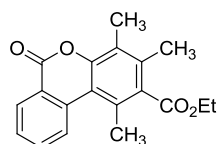

The reaction of 3-methyl-1-phenylpenta-3,4-dien-2-one (**1i**, 34 mg, 0.2 mmol), ethyl 3-oxobutanoate (**2a**, 31 mg, 0.24 mmol),  $\text{Cs}_2\text{CO}_3$  (65 mg, 0.2 mmol), anhydrous  $\text{Na}_2\text{SO}_4$  (28 mg, 0.2 mmol),  $\text{Pd}(\text{OAc})_2$  (4.5 mg, 0.02 mmol) and  $\text{AgOAc}$  (100 mg, 0.6 mmol) in  $\text{CH}_3\text{CN}$  (4 mL) under CO (1atm) afforded 47 mg (76%) of **4f**: Eluent: ethyl acetate / petroleum ether (10%); White solid; Mp: 99-101 °C (ethyl acetate);  $^1\text{H}$  NMR (400 MHz,  $\text{CDCl}_3$ )  $\delta$ : 1.43 (t,  $J = 7.2$  Hz, 3H), 2.31 (s, 3H), 2.41 (s, 3H), 2.72 (s, 3H), 4.46 (q,  $J = 7.2$  Hz, 2H), 7.57 (t,  $J = 7.6$  Hz, 1H), 7.79 (t,  $J = 7.6$  Hz, 1H), 8.23 (d,  $J = 8.4$  Hz, 1H), 8.45 (d,  $J = 7.6$  Hz, 1H);  $^{13}\text{C}$  NMR (100 MHz,  $\text{CDCl}_3$ )  $\delta$ : 12.2, 14.2, 17.3, 21.5, 61.5, 115.7, 122.1, 123.8, 126.7, 128.0, 129.0, 130.6, 133.8, 134.0, 134.9, 135.8, 150.0, 161.1, 170.4; MS:  $m/z$  311  $[\text{MH}]^+$ ; HRMS calcd for  $\text{C}_{19}\text{H}_{19}\text{O}_4$ : 311.1283  $[\text{M}+\text{H}]$ , found: 311.1286.

#### Ethyl 4-ethyl-1,3-dimethyl-6-oxo-6H-benzo[*c*]chromene-2-carboxylate (**4g**)

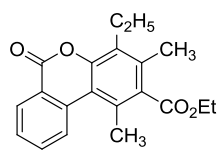

The reaction of 3-ethyl-1-phenylpenta-3,4-dien-2-one (**1j**, 37 mg, 0.2 mmol), ethyl 3-oxobutanoate (**2a**, 31 mg, 0.24 mmol),  $\text{Cs}_2\text{CO}_3$  (65 mg, 0.2 mmol), anhydrous  $\text{Na}_2\text{SO}_4$  (28 mg, 0.2 mmol),  $\text{Pd}(\text{OAc})_2$  (4.5 mg, 0.02 mmol) and  $\text{AgOAc}$  (100 mg, 0.6 mmol) in  $\text{CH}_3\text{CN}$  (4 mL) under CO (1atm) afforded 45 mg (70%) of **4g**: Eluent: ethyl acetate / petroleum ether (10%); White solid; Mp: 112-114 °C (ethyl acetate);  $^1\text{H}$  NMR (400 MHz,  $\text{CDCl}_3$ )  $\delta$ : 1.18 (t,  $J = 7.2$  Hz, 3H), 1.42 (t,  $J = 7.6$  Hz, 3H), 2.32 (s, 3H), 2.70 (s, 3H), 2.91 (q,  $J = 7.6$  Hz, 2H), 4.44 (q,  $J = 7.2$  Hz, 2H), 7.53 (t,  $J = 7.2$  Hz, 1H), 7.76 (t,  $J = 7.6$  Hz, 1H), 8.20 (d,  $J = 8.4$  Hz, 1H), 8.42 (d,  $J = 8.0$  Hz, 1H);  $^{13}\text{C}$  NMR (100 MHz,  $\text{CDCl}_3$ )  $\delta$ : 13.7, 14.3, 16.4, 19.7, 21.5, 61.5, 115.8, 122.1, 126.6, 128.0, 129.2, 129.6, 130.5, 134.0,

134.1, 134.2, 135.8, 149.8, 161.1, 170.4; MS:  $m/z$  325  $[MH]^+$ ; HRMS calcd for  $C_{20}H_{21}O_4$ : 325.1440  $[M+H]$ , found: 325.1449.

#### 7-Methyl-10,11-dihydro-4H-benzo[*f*]thieno[3,2-*c*]chromene-4,8(9H)-dione (4h)

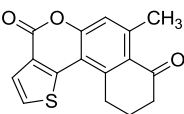 The reaction of 1-(thiophen-2-yl)penta-3,4-dien-2-one (**1k**, 33 mg, 0.2 mmol), cyclohexane-1,3-dione (**2b**, 27 mg, 0.24 mmol),  $CS_2CO_3$  (65 mg, 0.2 mmol), anhydrous  $Na_2SO_4$  (28 mg, 0.2 mmol),  $Pd(OAc)_2$  (4.5 mg, 0.02 mmol) and  $AgOAc$  (100 mg, 0.6 mmol) in  $CH_3CN$  (4 mL) under CO (1atm) afforded 39 mg (69%) of **4h**: Eluent: ethyl acetate / petroleum ether (10%); White solid; Mp: 125-127 °C (ethyl acetate);  $^1H$  NMR (400 MHz,  $CDCl_3$ )  $\delta$ : 2.30 (t,  $J = 6.8$  Hz, 2H), 2.71-2.74 (m, 5H), 3.34 (t,  $J = 6.4$  Hz, 2H), 7.23 (s, 1H), 7.55 (d,  $J = 5.6$  Hz, 1H), 7.80 (d,  $J = 5.6$  Hz, 1H);  $^{13}C$  NMR (100 MHz,  $CDCl_3$ )  $\delta$ : 22.1, 23.9, 29.8, 39.7, 114.6, 119.5, 125.4, 126.7, 126.9, 128.8, 142.3, 144.2, 146.0, 153.3, 156.9, 198.6; MS:  $m/z$  285  $[MH]^+$ ; HRMS calcd for  $C_{16}H_{13}O_3S$ : 285.0585  $[M+H]$ , found: 285.0591.

#### 8-Methyl-11-phenyl-11,12-dihydro-5H-dibenzo[*c,f*]chromene-5,9(10H)-dione (4i)

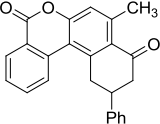 The reaction of 1-phenylpenta-3,4-dien-2-one (**1a**, 32 mg, 0.2 mmol), 5-phenylcyclohexane-1,3-dione (**2c**, 45 mg, 0.24 mmol),  $CS_2CO_3$  (65 mg, 0.2 mmol), anhydrous  $Na_2SO_4$  (28 mg, 0.2 mmol),  $Pd(OAc)_2$  (4.5 mg, 0.02 mmol) and  $AgOAc$  (100 mg, 0.6 mmol) in  $CH_3CN$  (4 mL) under CO (1atm) afforded 47 mg (66%) of **4i**: Eluent: ethyl acetate / petroleum ether (20%); Yellow solid; Mp: 158-160 °C (ethyl acetate);  $^1H$  NMR (400 MHz,  $CDCl_3$ )  $\delta$ : 2.76 (s, 3H), 2.99-3.02 (m, 2H), 3.25-3.28 (m, 1H), 3.52-3.58 (m, 1H), 3.74 (dd,  $J_1 = 15.2$  Hz,  $J_2 = 1.6$  Hz, 1H), 7.20 (s, 1H), 7.31-7.34 (m, 3H), 7.39-7.42 (m, 2H), 7.57-7.61 (m, 1H), 7.75-7.79 (m, 1H), 8.08 (d,  $J = 8.0$  Hz, 1H), 8.46 (d,  $J = 8.0$  Hz, 1H);  $^{13}C$  NMR (100 MHz,  $CDCl_3$ )  $\delta$ : 23.6, 29.7, 41.2, 47.4, 119.8, 122.4, 126.7, 126.8, 126.88, 126.94, 128.9, 129.0, 129.3, 129.9, 130.9, 134.7, 142.9, 143.6, 144.2, 156.0, 160.7, 198.6; MS:  $m/z$  355  $[MH]^+$ ; HRMS calcd for  $C_{24}H_{19}O_3$ : 355.1334  $[M+H]$ , found: 355.1338.



### 2,3-Dimethoxy-8-methyl-11-phenyl-11,12-dihydro-5H-dibenzo[*c,f*]chromene-5,9(10*H*)-dione (4j)

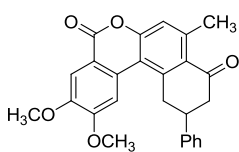

The reaction of 1-(3,4-dimethoxyphenyl)penta-3,4-dien-2-one (**1c**, 44 mg, 0.2 mmol), 5-phenylcyclohexane-1,3-dione (**2c**, 45 mg, 0.24 mmol), Cs<sub>2</sub>CO<sub>3</sub> (65 mg, 0.2 mmol), anhydrous Na<sub>2</sub>SO<sub>4</sub> (28 mg, 0.2 mmol), Pd(OAc)<sub>2</sub> (4.5 mg, 0.02 mmol) and AgOAc

(100 mg, 0.6 mmol) in CH<sub>3</sub>CN (4 mL) under CO (1atm) afforded 57 mg (69%) of **4j**: Eluent: ethyl acetate / petroleum ether (20%); White solid; Mp: 206-208 °C (ethyl acetate); <sup>1</sup>H NMR (400 MHz, CDCl<sub>3</sub>) δ: 2.75 (s, 3H), 2.90-3.07 (m, 2H), 3.27-3.30 (m, 1H), 3.52-3.59 (m, 1H), 3.80-3.93 (m, 4H), 4.01 (s, 3H), 7.19 (s, 1H), 7.31 (d, *J* = 8.0 Hz, 3H), 7.32-7.40 (m, 2H), 7.53 (s, 1H), 7.83 (s, 1H); <sup>13</sup>C NMR (100 MHz, CDCl<sub>3</sub>) δ: 23.5, 40.4, 40.8, 46.3, 56.1, 56.3, 108.9, 111.1, 115.6, 115.8, 119.7, 126.5, 127.3, 129.0, 129.1, 129.7, 142.5, 142.9, 143.4, 149.3, 153.1, 153.8, 160.5, 198.5; MS: *m/z* 415 [MH]<sup>+</sup>; HRMS calcd for C<sub>26</sub>H<sub>23</sub>O<sub>5</sub>:415.1545 [M+H], found: 415.1549.

### 7,8-Dimethyl-11-phenyl-11,12-dihydro-5H-dibenzo[*c,f*]chromene-5,9(10*H*)-dione (4k)

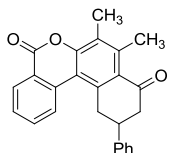

The reaction of 3-methyl-1-phenylpenta-3,4-dien-2-one (**1i**, 34 mg, 0.2 mmol), 5-phenylcyclohexane-1,3-dione (**2c**, 45 mg, 0.24 mmol), Cs<sub>2</sub>CO<sub>3</sub> (65 mg, 0.2 mmol),

anhydrous Na<sub>2</sub>SO<sub>4</sub> (28 mg, 0.2 mmol), Pd(OAc)<sub>2</sub> (4.5 mg, 0.02 mmol) and AgOAc (100 mg, 0.6 mmol) in CH<sub>3</sub>CN (4 mL) under CO (1atm) afforded 52 mg (71%) of **4k**: Eluent: ethyl acetate / petroleum ether (10%); White solid; Mp: 182-184 °C (ethyl acetate); <sup>1</sup>H NMR (400 MHz, CDCl<sub>3</sub>) δ: 2.44 (s, 3H), 2.64 (s, 3H), 2.91-3.05 (m, 2H), 3.21 (t, *J* = 12.4 Hz, 1H), 3.45 (t, *J* = 12.4 Hz, 1H), 3.63 (t, *J* = 12.4 Hz, 1H), 7.26-7.41 (m, 5H), 7.54 (t, *J* = 7.6 Hz, 1H), 7.73 (t, *J* = 7.6 Hz, 1H), 7.99 (d, *J* = 8.0 Hz, 1H), 8.39 (d, *J* = 8.0 Hz, 1H); <sup>13</sup>C NMR (100 MHz, CDCl<sub>3</sub>) δ: 12.3, 18.1, 40.0, 41.3, 46.5, 115.0, 122.2, 125.4, 126.9, 127.15, 127.21, 128.3, 128.9, 130.3, 130.5, 134.1, 134.9, 139.9, 141.9, 143.0, 151.6, 160.7, 199.7; MS: *m/z* 369 [MH]<sup>+</sup>; HRMS calcd for C<sub>25</sub>H<sub>21</sub>O<sub>3</sub>:369.1491 [M+H], found: 369.1494.

### 1,3-Dimethyl-6*H*-benzo[*c*]chromen-6-one (4l)

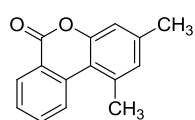

The reaction of 1-phenylpenta-3,4-dien-2-one (**1a**, 32 mg, 0.2 mmol), pentane-2,4-dione (**2d**, 24 mg, 0.24 mmol), Cs<sub>2</sub>CO<sub>3</sub> (65 mg, 0.2 mmol), anhydrous Na<sub>2</sub>SO<sub>4</sub> (28 mg, 0.2 mmol), Pd(OAc)<sub>2</sub> (4.5 mg, 0.02 mmol) and AgOAc (100 mg, 0.6 mmol) in CH<sub>3</sub>CN (4 mL) under CO (1atm) afforded 32 mg (72%) of **4l**: Eluent: ethyl acetate / petroleum ether (5%); White solid; Mp: 137-139 °C (ethyl acetate); <sup>1</sup>H NMR (400 MHz, CDCl<sub>3</sub>) δ: 2.41 (s, 3H), 2.86 (s, 3H), 7.00 (s, 1H), 7.09 (s, 1H), 7.57 (t, *J* = 7.6 Hz, 1H), 7.81 (t, *J* = 7.6 Hz, 1H), 8.36 (d, *J* = 8.4 Hz, 1H), 8.49 (d, *J* = 8.4 Hz, 1H); <sup>13</sup>C NMR (100 MHz, CDCl<sub>3</sub>) δ: 21.0, 25.4, 114.8, 116.4, 121.7, 125.8, 127.6, 128.1, 130.0, 130.8, 134.2, 135.8, 136.3, 139.9, 152.2, 161.5; MS: *m/z* 225 [MH]<sup>+</sup>; HRMS calcd for C<sub>15</sub>H<sub>13</sub>O<sub>2</sub>: 225.0916 [M+H], found: 225.0919.

#### 1,3,8-Trimethyl-6*H*-benzo[*c*]chromen-6-one (**4m**)

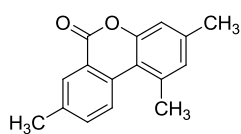

The reaction of 1-*p*-tolylpenta-3,4-dien-2-one (**1l**, 34 mg, 0.2 mmol), pentane-2,4-dione (**2d**, 24 mg, 0.24 mmol), Cs<sub>2</sub>CO<sub>3</sub> (65 mg, 0.2 mmol), anhydrous Na<sub>2</sub>SO<sub>4</sub> (28 mg, 0.2 mmol), Pd(OAc)<sub>2</sub> (4.5 mg, 0.02 mmol) and AgOAc (100 mg, 0.6 mmol) in CH<sub>3</sub>CN (4 mL) under CO (1atm) afforded 31 mg (66%) of **4m**: Eluent: ethyl acetate / petroleum ether (5%); White solid; Mp: 170-171 °C (ethyl acetate); <sup>1</sup>H NMR (400 MHz, CDCl<sub>3</sub>) δ: 2.41 (s, 3H), 2.50 (s, 3H), 2.84 (s, 3H), 6.98 (s, 1H), 7.08 (s, 1H), 7.62 (d, *J* = 8.8 Hz, 1H), 8.24 (d, *J* = 8.4 Hz, 1H), 8.29 (s, 1H); <sup>13</sup>C NMR (100 MHz, CDCl<sub>3</sub>) δ: 21.0, 21.3, 25.4, 115.0, 116.3, 125.9, 128.9, 129.9, 130.1, 130.8, 133.7, 135.4, 137.8, 139.4, 152.0, 161.8; MS: *m/z* 239 [MH]<sup>+</sup>; HRMS calcd for C<sub>16</sub>H<sub>15</sub>O<sub>2</sub>: 239.1072 [M+H], found: 239.1077.

#### 8-Methoxy-1,3-dimethyl-6*H*-benzo[*c*]chromen-6-one (**4n**)

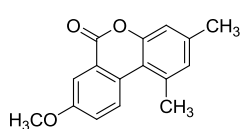

The reaction of 1-(4-methoxyphenyl)penta-3,4-dien-2-one (**1b**, 38 mg, 0.2 mmol), pentane-2,4-dione (**2d**, 24 mg, 0.24 mmol), Cs<sub>2</sub>CO<sub>3</sub> (65 mg, 0.2 mmol), anhydrous Na<sub>2</sub>SO<sub>4</sub> (28 mg, 0.2 mmol), Pd(OAc)<sub>2</sub> (4.5 mg, 0.02 mmol) and AgOAc (100 mg, 0.6 mmol) in CH<sub>3</sub>CN

(4 mL) under CO (1atm) afforded 36 mg (70%) of **4n**: Eluent: ethyl acetate / petroleum ether (5%); White solid; Mp: 184-186 °C (ethyl acetate); <sup>1</sup>H NMR (400 MHz, CDCl<sub>3</sub>) δ: 2.39 (s, 3H), 2.83 (s, 3H), 3.95 (s, 3H), 6.98 (s, 1H), 7.08 (s, 1H), 7.37 (dd, *J*<sub>1</sub> = 9.2 Hz, *J*<sub>2</sub> = 2.0 Hz, 1H), 7.92 (d, *J* = 2.0 Hz, 1H), 8.30 (d, *J* = 9.2 Hz, 1H); <sup>13</sup>C NMR (100 MHz, CDCl<sub>3</sub>) δ: 20.9, 21.2, 55.3, 113.0, 114.8, 122.8, 124.8, 127.1, 127.5, 129.9, 131.6, 134.9, 138.4, 153.0, 159.3, 161.6; MS: *m/z* 255 [MH]<sup>+</sup>; HRMS calcd for C<sub>16</sub>H<sub>15</sub>O<sub>3</sub>: 255.1021 [M+H], found: 255.1023.

#### 8,9-Dimethoxy-1,3-dimethyl-6*H*-benzo[*c*]chromen-6-one (4o)

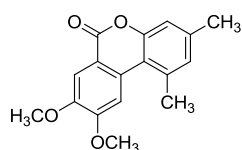

The reaction of 1-(3,4-dimethoxyphenyl)penta-3,4-dien-2-one (**1c**, 44 mg, 0.2 mmol), pentane-2,4-dione (**2d**, 24 mg, 0.24 mmol), Cs<sub>2</sub>CO<sub>3</sub> (65 mg, 0.2 mmol), anhydrous Na<sub>2</sub>SO<sub>4</sub> (28 mg, 0.2 mmol), Pd(OAc)<sub>2</sub> (4.5 mg, 0.02 mmol) and AgOAc (100 mg, 0.6 mmol) in CH<sub>3</sub>CN (4 mL) under CO (1atm) afforded 40 mg (70%) of **4o**: Eluent: ethyl acetate / petroleum ether (10%); White solid; Mp: 211-213 °C (ethyl acetate); <sup>1</sup>H NMR (400 MHz, CDCl<sub>3</sub>) δ: 2.39 (s, 3H), 2.87 (s, 3H), 4.02 (s, 3H), 4.06 (s, 3H), 6.97 (s, 1H), 7.08 (s, 1H), 7.80 (s, 1H), 7.85 (s, 1H); <sup>13</sup>C NMR (100 MHz, CDCl<sub>3</sub>) δ: 21.0, 25.2, 56.1, 56.2, 107.7, 111.0, 114.9, 115.1, 116.5, 130.0, 131.5, 134.5, 139.1, 148.7, 152.0, 154.0 161.4; MS: *m/z* 285 [MH]<sup>+</sup>; HRMS calcd for C<sub>17</sub>H<sub>17</sub>O<sub>4</sub>: 285.1127 [M+H], found: 285.1132.

#### 4-Ethyl-1,3-dimethyl-6*H*-benzo[*c*]chromen-6-one (4p)

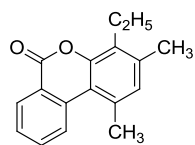

The reaction of 3-ethyl-1-phenylpenta-3,4-dien-2-one (**1j**, 37 mg, 0.2 mmol), pentane-2,4-dione (**2d**, 24 mg, 0.24 mmol), Cs<sub>2</sub>CO<sub>3</sub> (65 mg, 0.2 mmol), anhydrous Na<sub>2</sub>SO<sub>4</sub> (28 mg, 0.2 mmol), Pd(OAc)<sub>2</sub> (4.5 mg, 0.02 mmol) and AgOAc (100 mg, 0.6 mmol) in CH<sub>3</sub>CN (4 mL) under CO (1atm) afforded 35 mg (69%) of **4p**: Eluent: ethyl acetate / petroleum ether (10%); White solid; Mp: 158-160 °C (ethyl acetate); <sup>1</sup>H NMR (400 MHz, CDCl<sub>3</sub>) δ: 1.22 (t, *J* = 7.2 Hz, 3H), 2.43 (s, 3H), 2.60 (s, 3H), 3.03 (q, *J* = 7.2 Hz, 1H), 7.26 (s, 1H), 7.57 (t, *J* = 7.2 Hz, 1H), 7.79 (t, *J* = 7.2 Hz, 1H), 8.26 (d, *J* = 8.4 Hz, 1H), 8.47 (d, *J* = 8.0 Hz, 1H); <sup>13</sup>C NMR (100 MHz, CDCl<sub>3</sub>) δ: 16.9, 20.2, 20.6,

21.2, 116.4, 122.1, 124.9, 126.6, 128.0, 130.2, 130.6, 130.8, 133.9, 136.1, 145.2, 147.5, 161.4; MS:  $m/z$  253  $[MH]^+$ ; HRMS calcd for  $C_{17}H_{17}O_2$ : 253.1229  $[M+H]$ , found: 253.1232.

### 1,3-Dimethyl-6-oxo-6H-benzo[*c*]chromene-2-carbonitrile (**4q**)

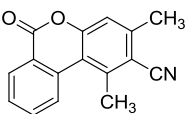 The reaction of 1-phenylpenta-3,4-dien-2-one (**1a**, 32 mg, 0.2 mmol), 3-oxobutanenitrile (**2e**, 20 mg, 0.24 mmol),  $CS_2CO_3$  (65 mg, 0.2 mmol), anhydrous  $Na_2SO_4$  (28 mg, 0.2 mmol),  $Pd(OAc)_2$  (4.5 mg, 0.02 mmol) and  $AgOAc$  (100 mg, 0.6 mmol) in  $CH_3CN$  (4 mL) under CO (1atm) afforded 33 mg (67%) of **4q**: Eluent: ethyl acetate / petroleum ether (10%); White solid; Mp: 257-259 °C (ethyl acetate);  $^1H$  NMR (400 MHz,  $CDCl_3$ )  $\delta$ : 2.62 (s, 3H), 3.08 (s, 3H), 7.19 (s, 1H), 7.65 (t,  $J = 7.2$  Hz, 1H), 7.87 (t,  $J = 8.0$  Hz, 1H), 8.30 (d,  $J = 8.4$  Hz, 1H), 8.47 (d,  $J = 8.4$  Hz, 1H);  $^{13}C$  NMR (100 MHz,  $CDCl_3$ )  $\delta$ : 21.1, 23.4, 112.6, 116.5, 117.0, 117.6, 122.1, 126.4, 129.0, 131.1, 134.5, 134.7, 141.1, 143.9, 153.9, 160.3; MS:  $m/z$  250  $[MH]^+$ ; HRMS calcd for  $C_{16}H_{12}NO_2$ : 250.0868  $[M+H]$ , found: 250.0881.

### 1,3,4-Trimethyl-6-oxo-6H-benzo[*c*]chromene-2-carbonitrile (**4r**)

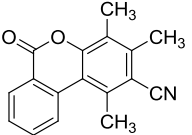 The reaction of 3-methyl-1-phenylpenta-3,4-dien-2-one (**1i**, 34 mg, 0.2 mmol), 3-oxobutanenitrile (**2e**, 20 mg, 0.24 mmol),  $CS_2CO_3$  (65 mg, 0.2 mmol), anhydrous  $Na_2SO_4$  (28 mg, 0.2 mmol),  $Pd(OAc)_2$  (4.5 mg, 0.02 mmol) and  $AgOAc$  (100 mg, 0.6 mmol) in  $CH_3CN$  (4 mL) under CO (1atm) afforded 42 mg (80%) of **4r**: Eluent: ethyl acetate / petroleum ether (10%); White solid; Mp: 225-226 °C (ethyl acetate);  $^1H$  NMR (400 MHz,  $CDCl_3$ )  $\delta$ : 2.42 (s, 3H), 2.60 (s, 3H), 3.01 (s, 3H), 7.63 (t,  $J = 7.6$  Hz, 1H), 7.85 (t,  $J = 7.6$  Hz, 1H), 8.24 (d,  $J = 8.0$  Hz, 1H), 8.44 (d,  $J = 8.0$  Hz, 1H);  $^{13}C$  NMR (100 MHz,  $CDCl_3$ )  $\delta$ : 12.4, 19.0, 23.2, 112.5, 116.3, 117.7, 121.8, 124.7, 126.6, 128.8, 130.7, 134.5, 134.8, 137.6, 142.1, 152.0, 160.2; MS:  $m/z$  264  $[MH]^+$ ; HRMS calcd for  $C_{17}H_{14}NO_2$ : 264.1025  $[M+H]$ , found: 264.1030.

### III. Copies of $^1\text{H}$ and $^{13}\text{C}$ NMR spectra of 3a-3u

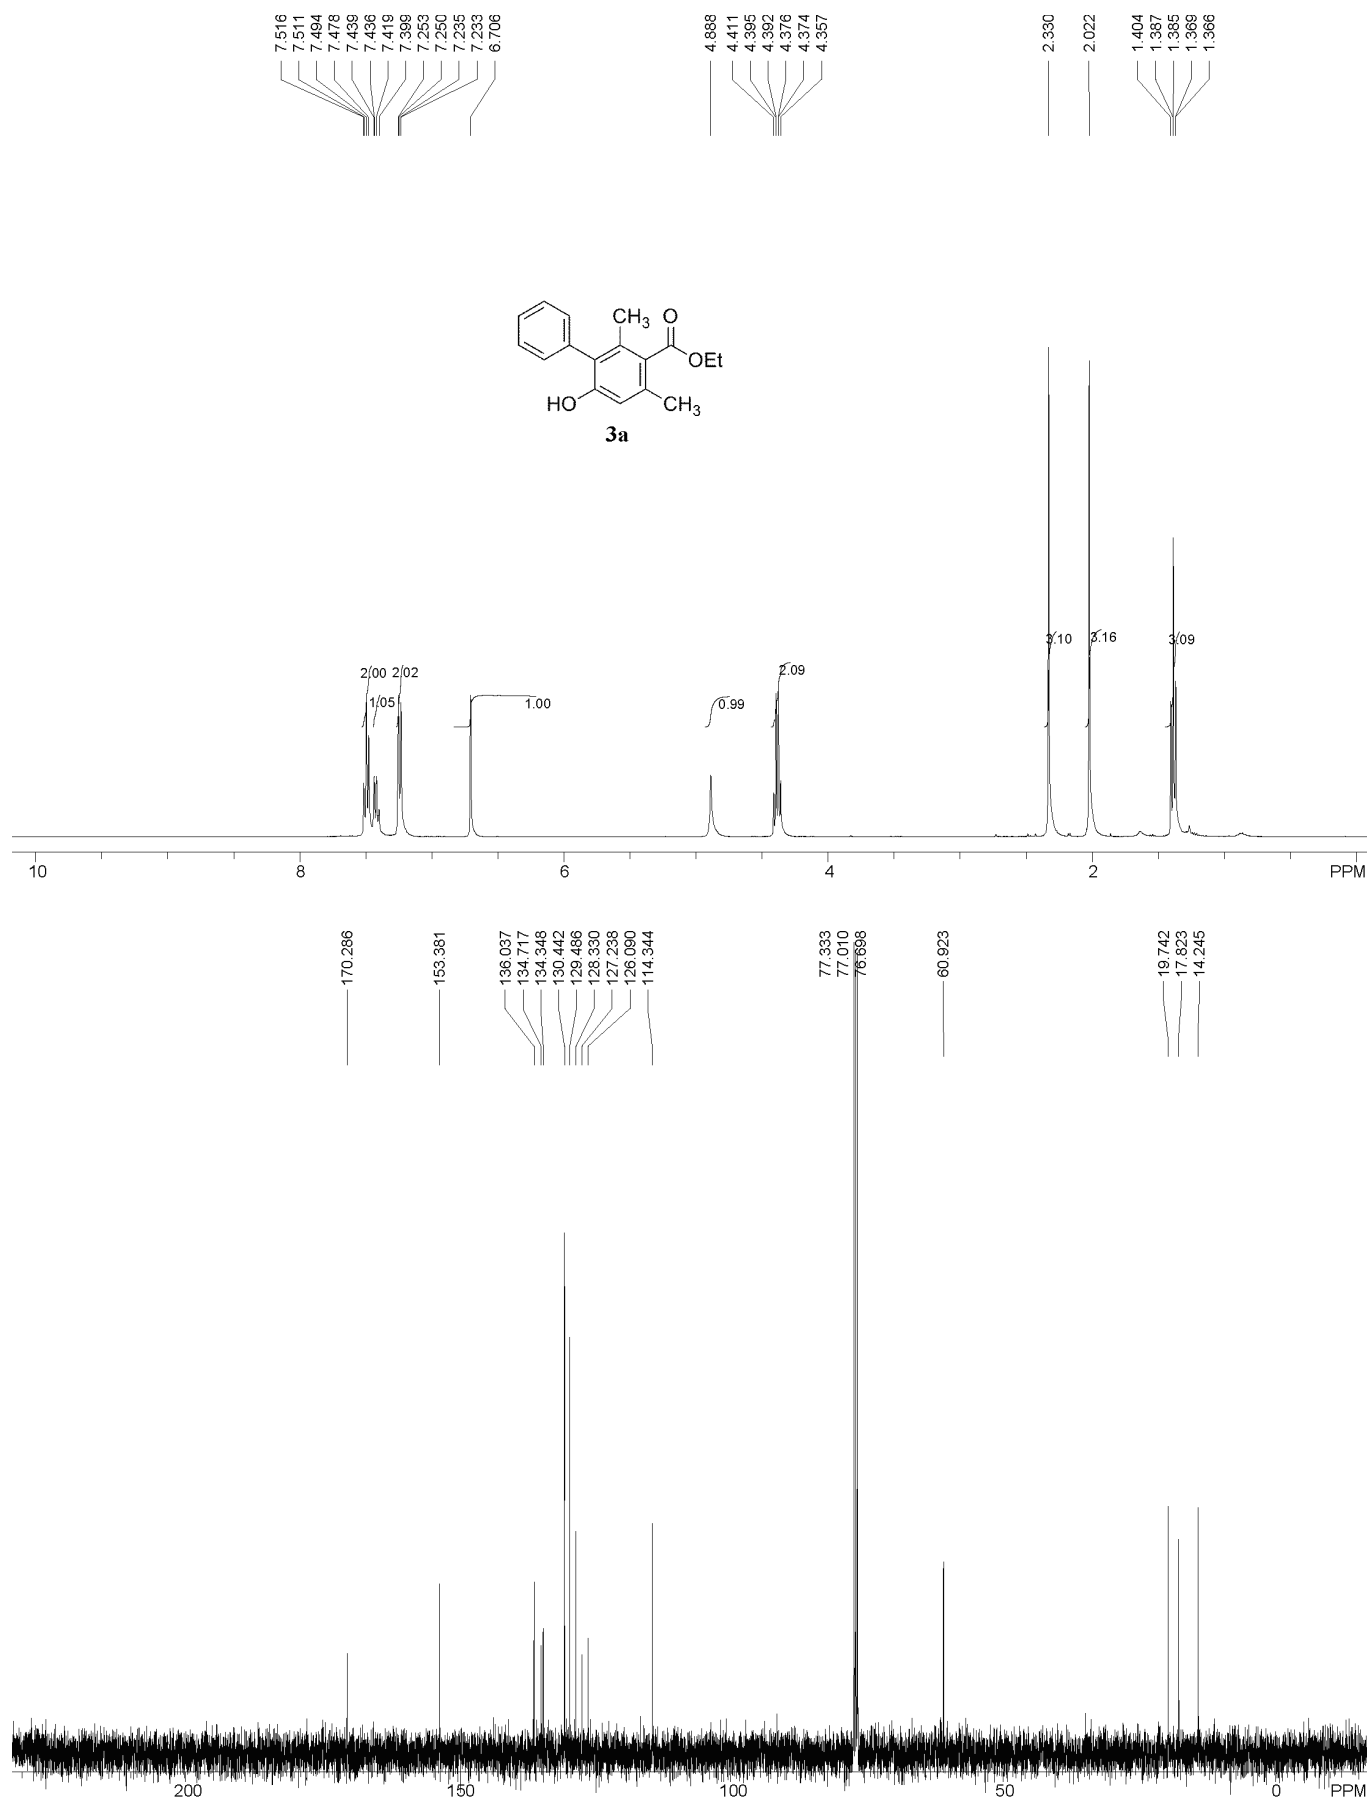

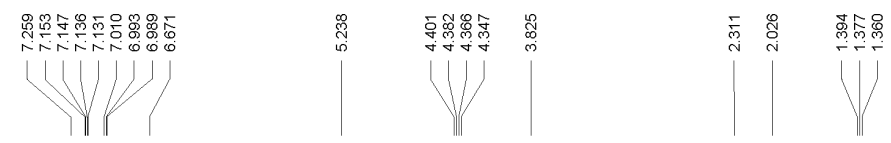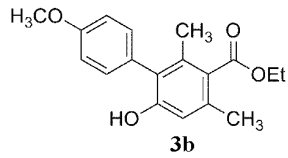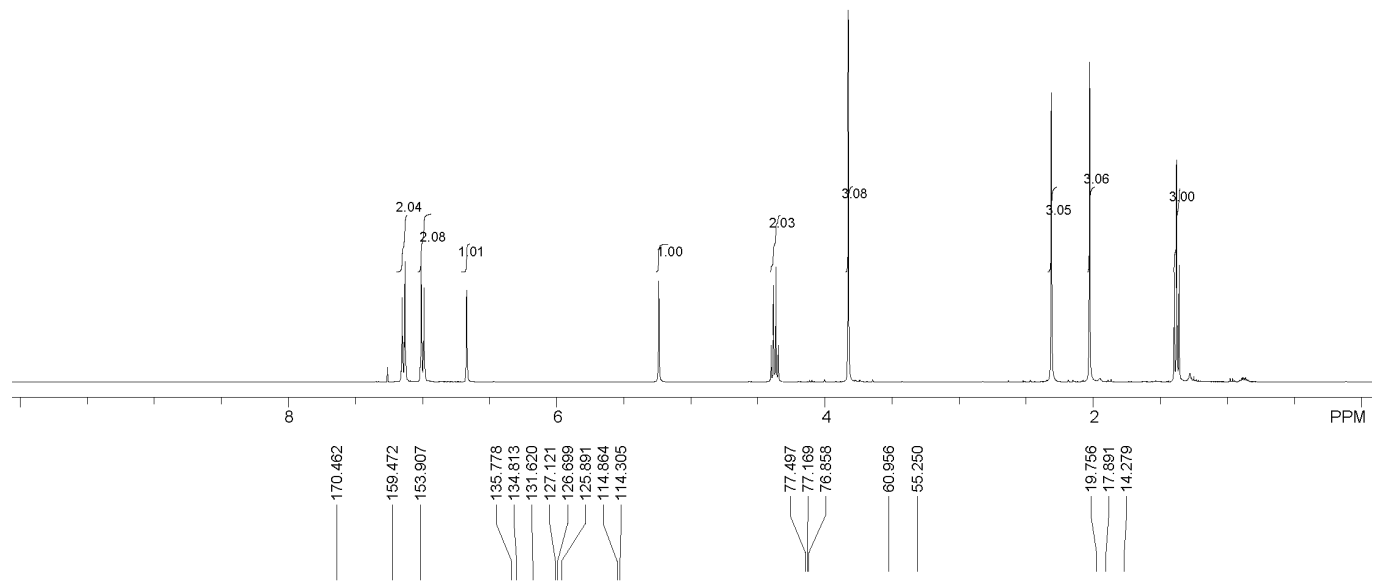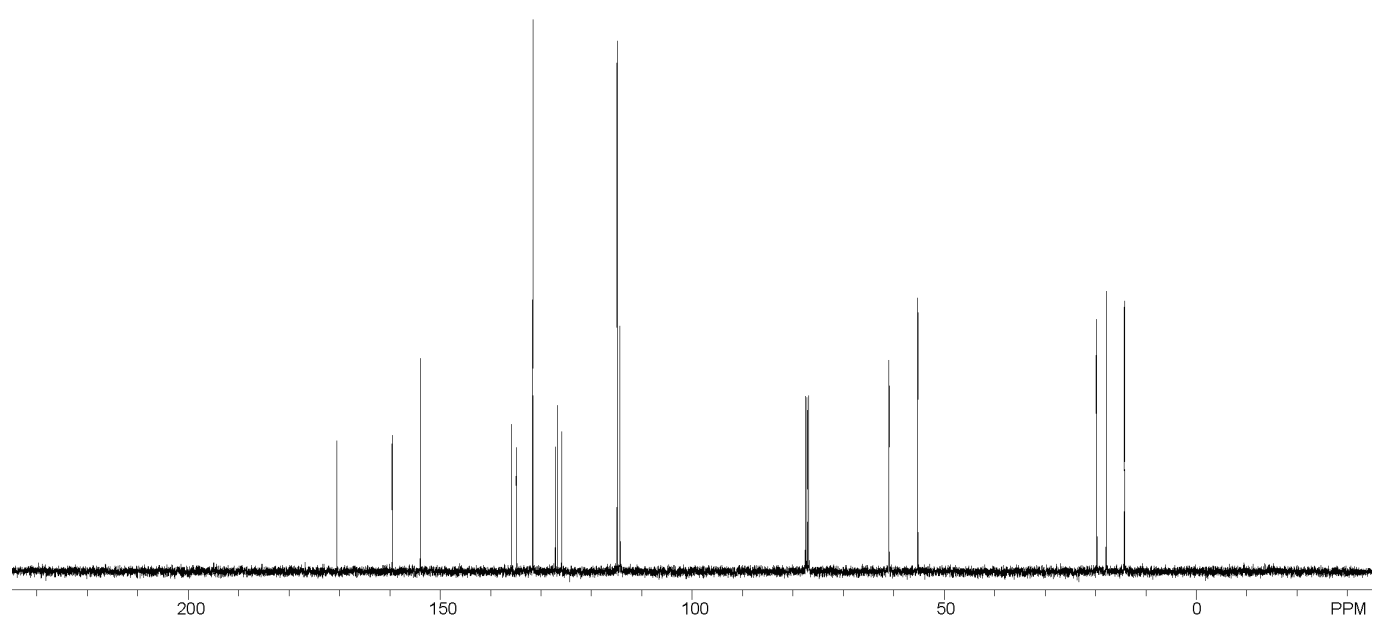

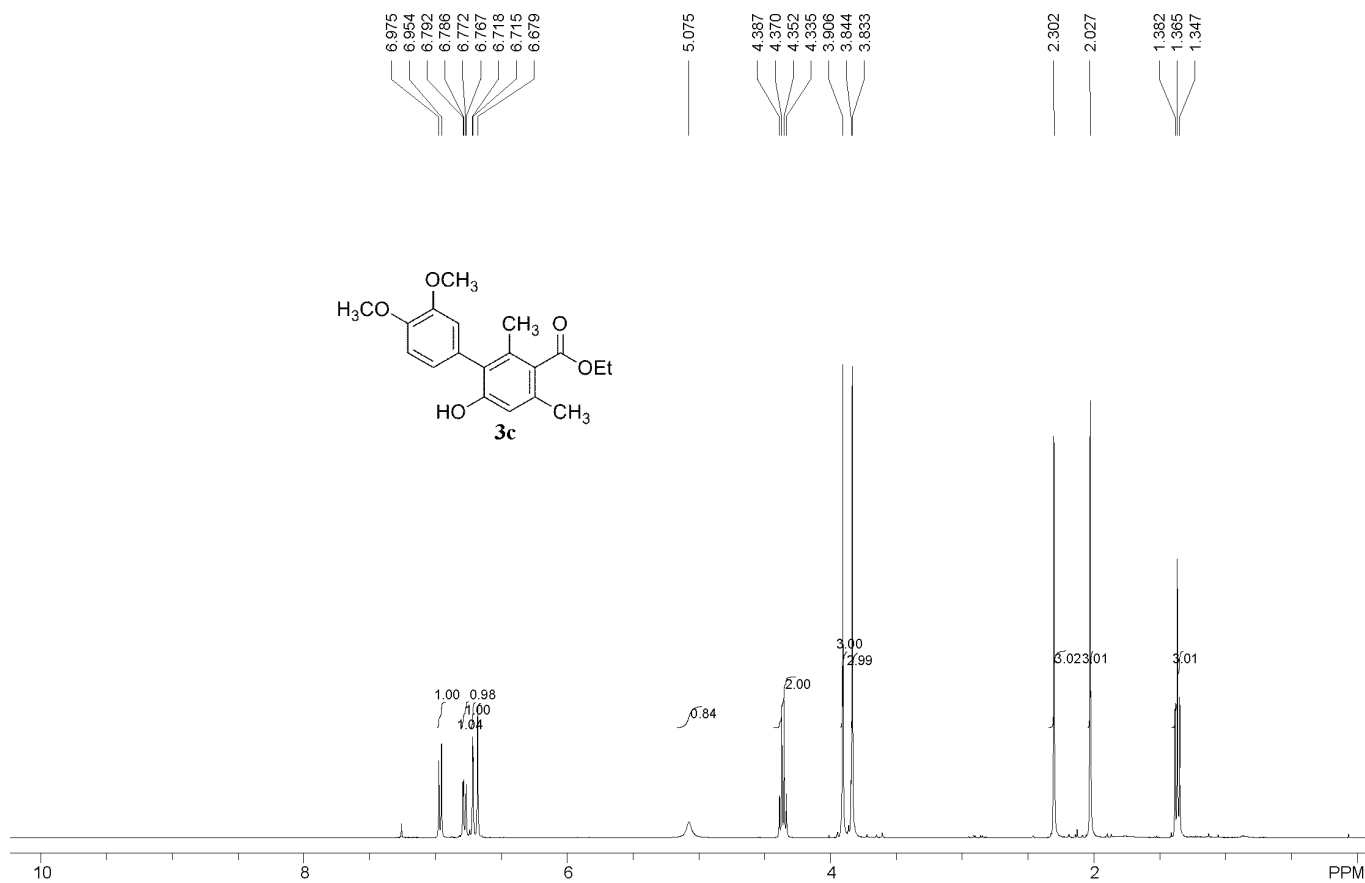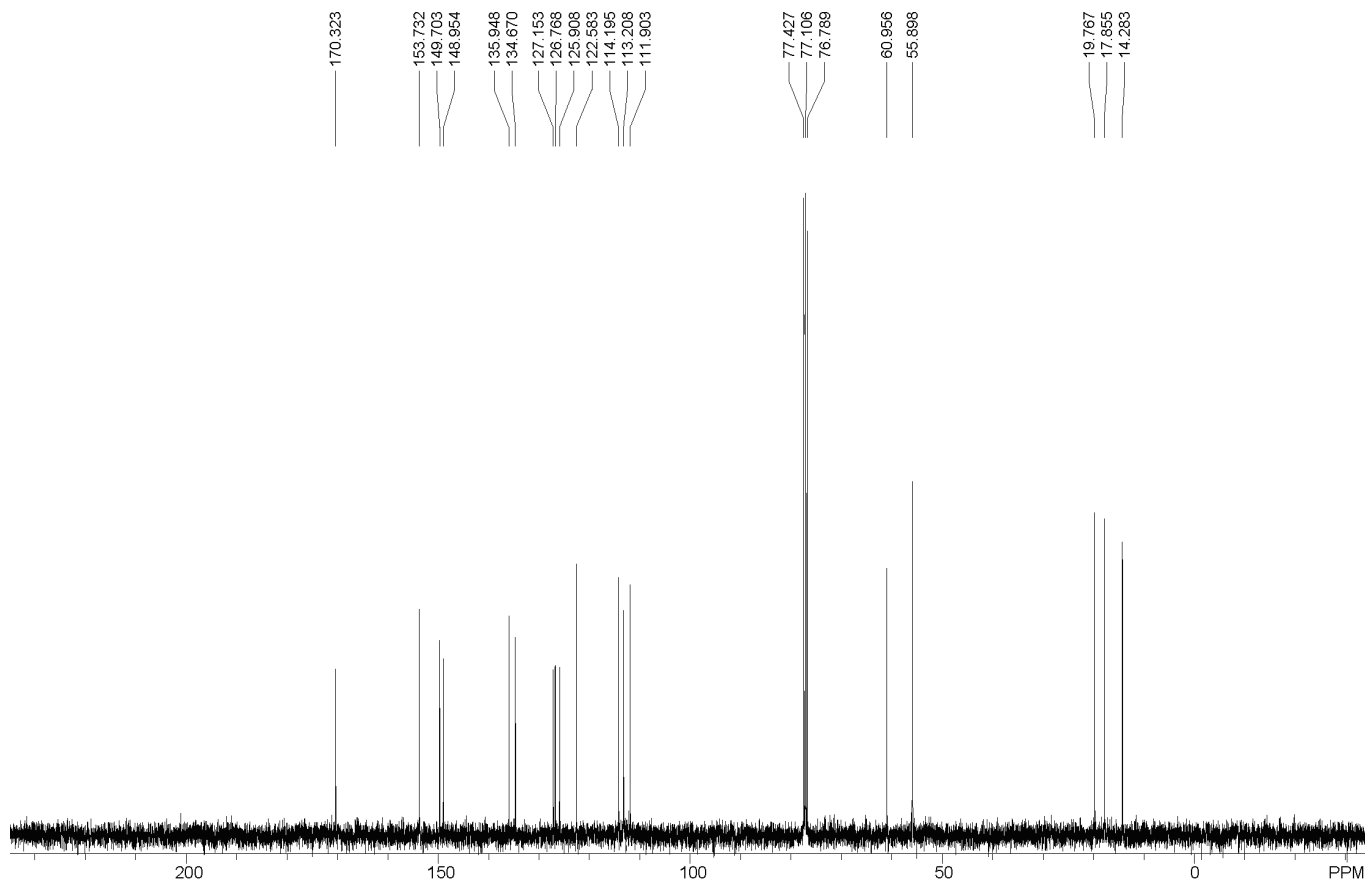

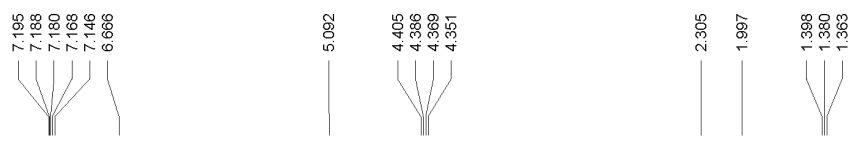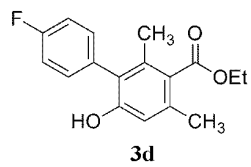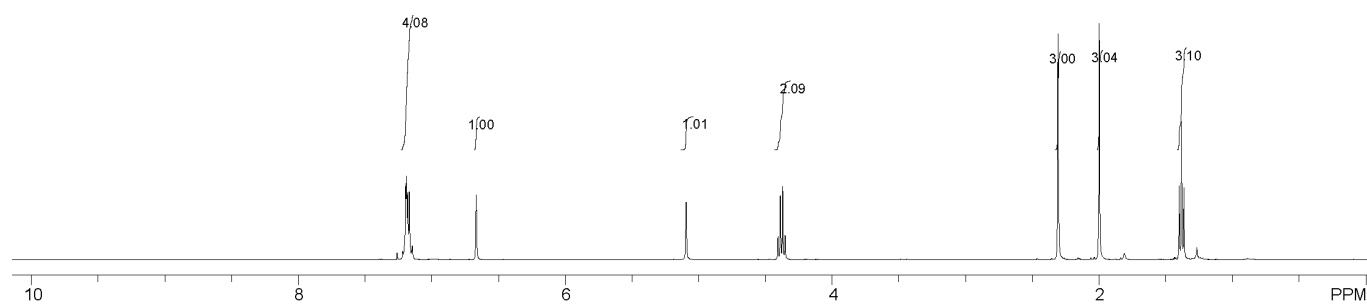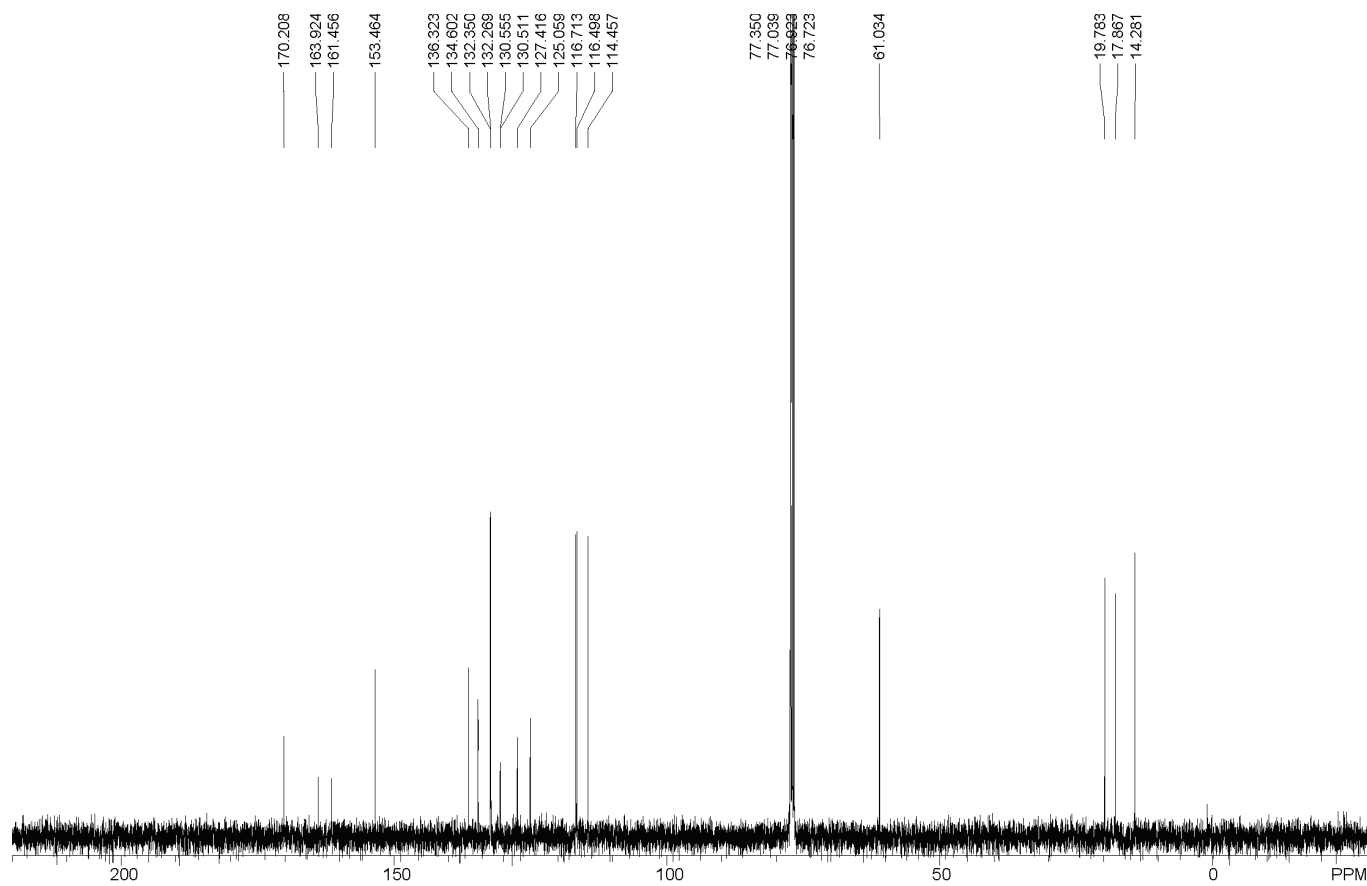



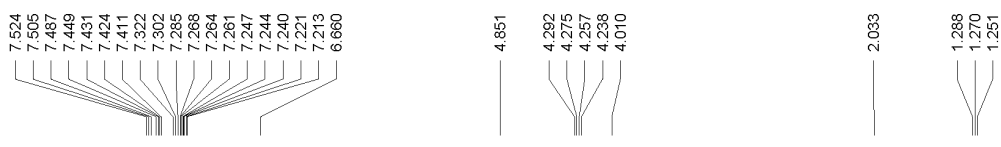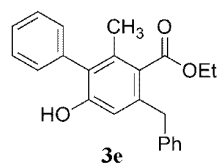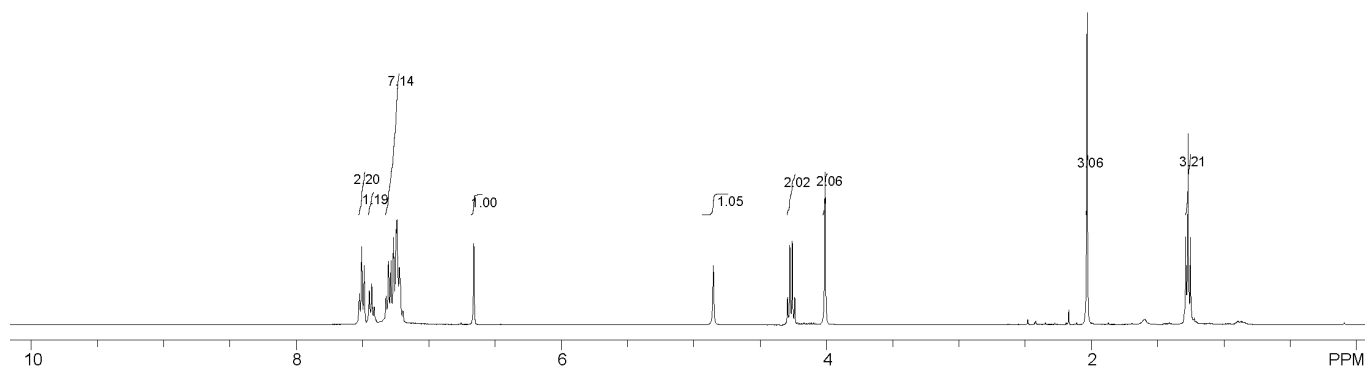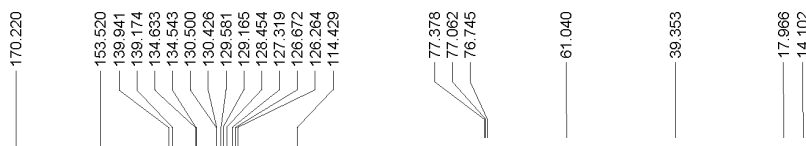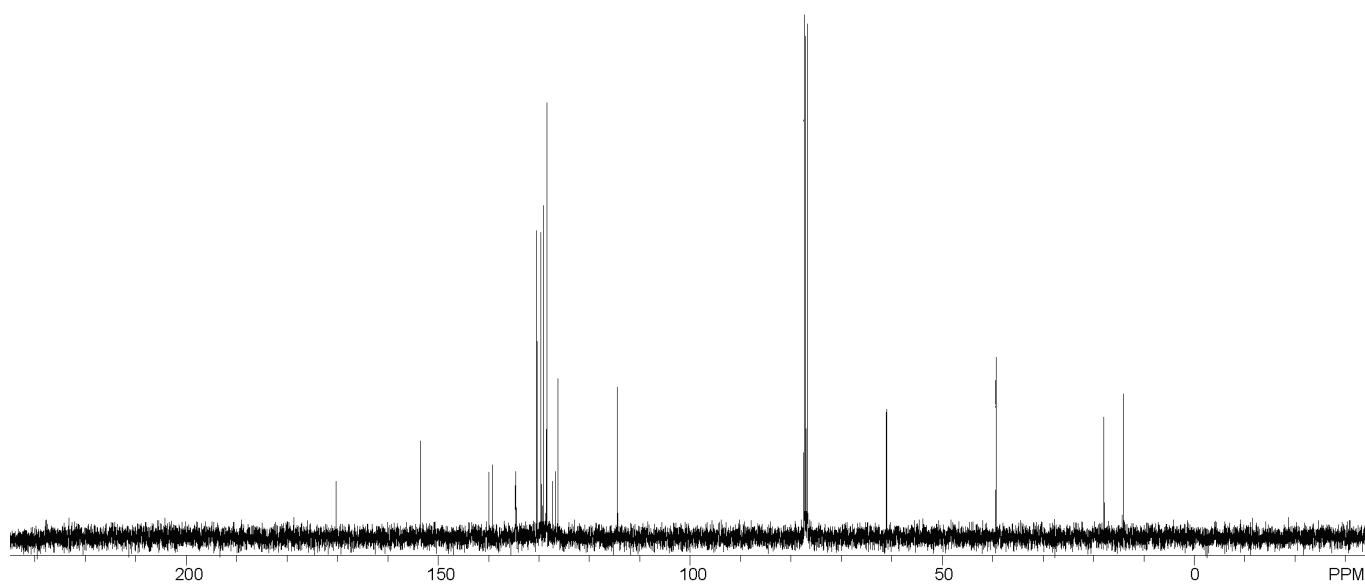

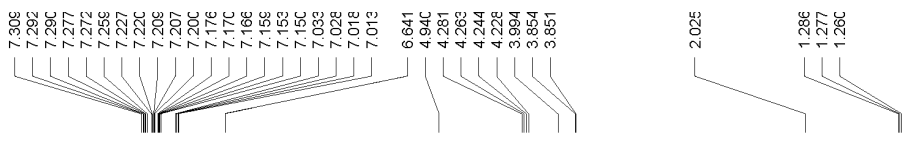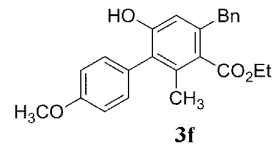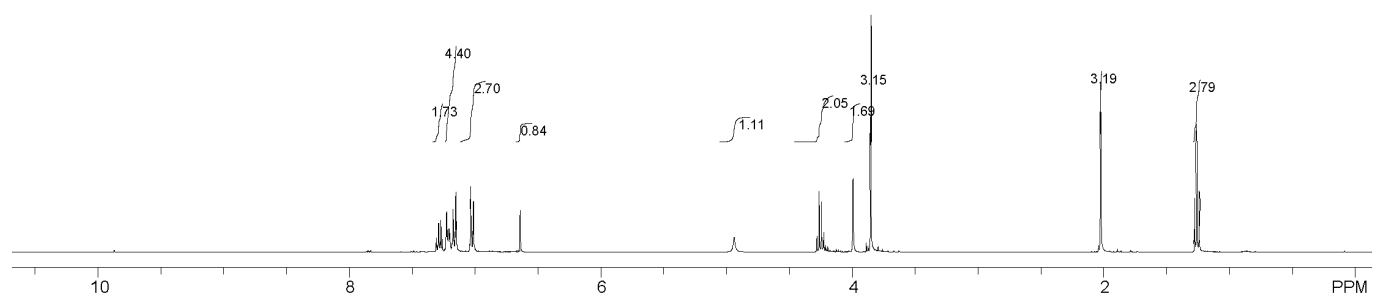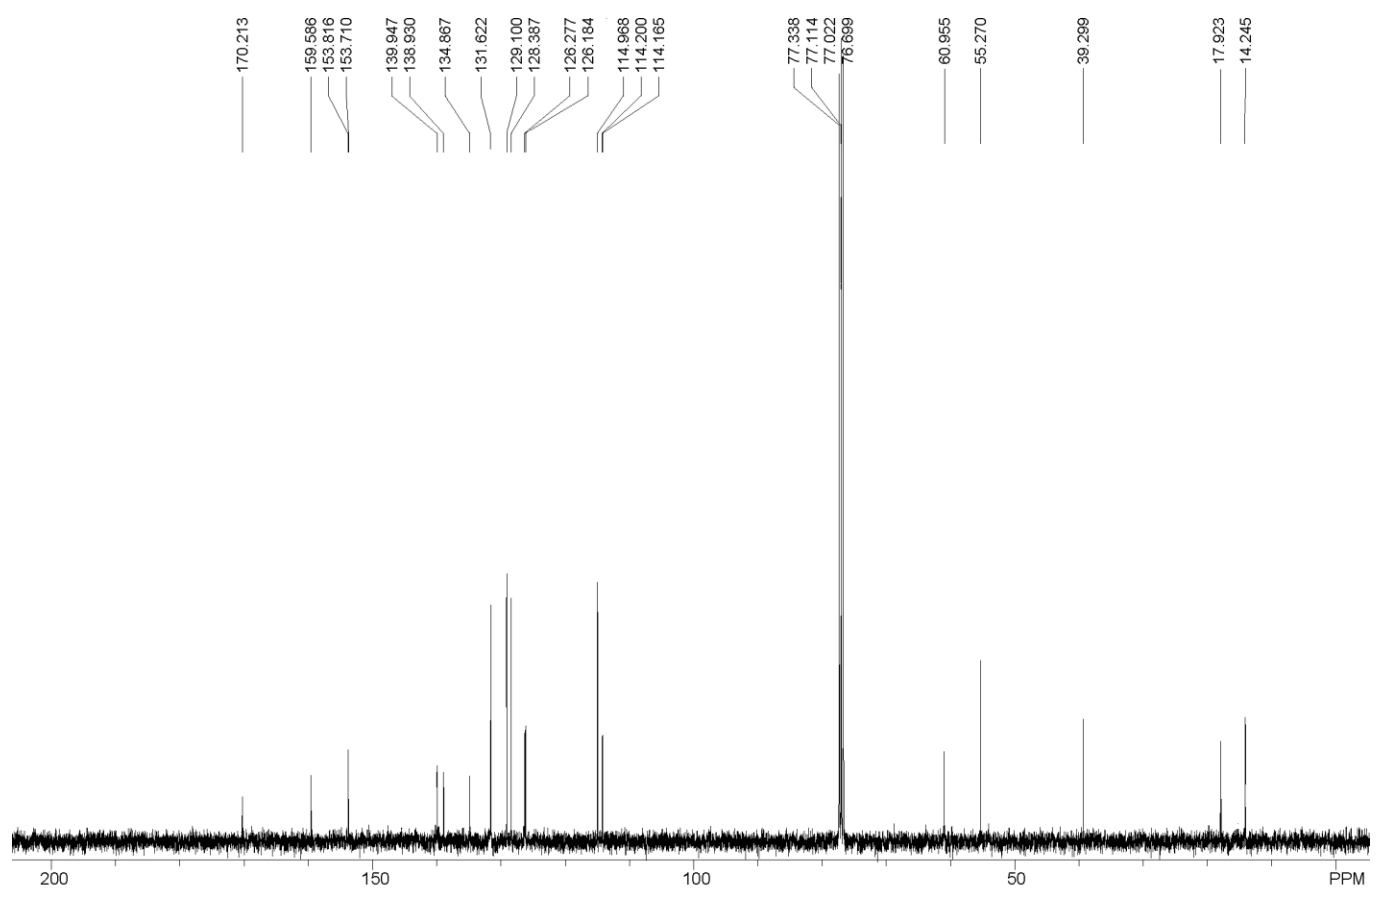

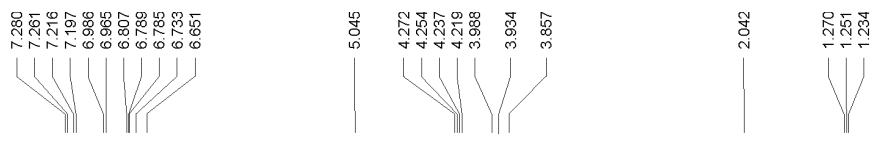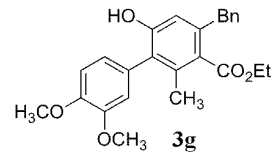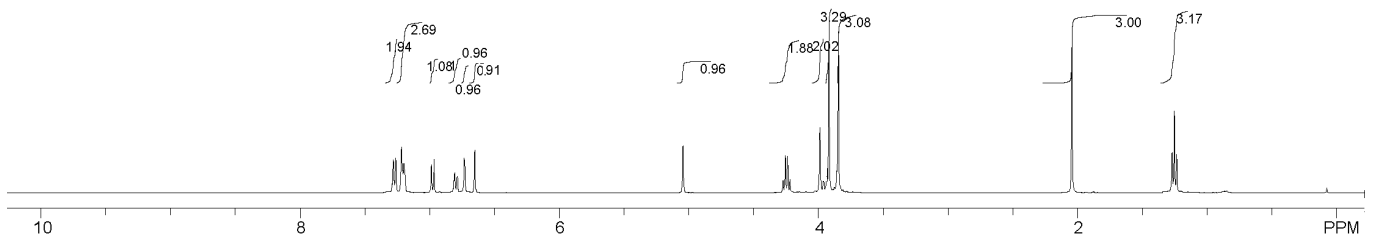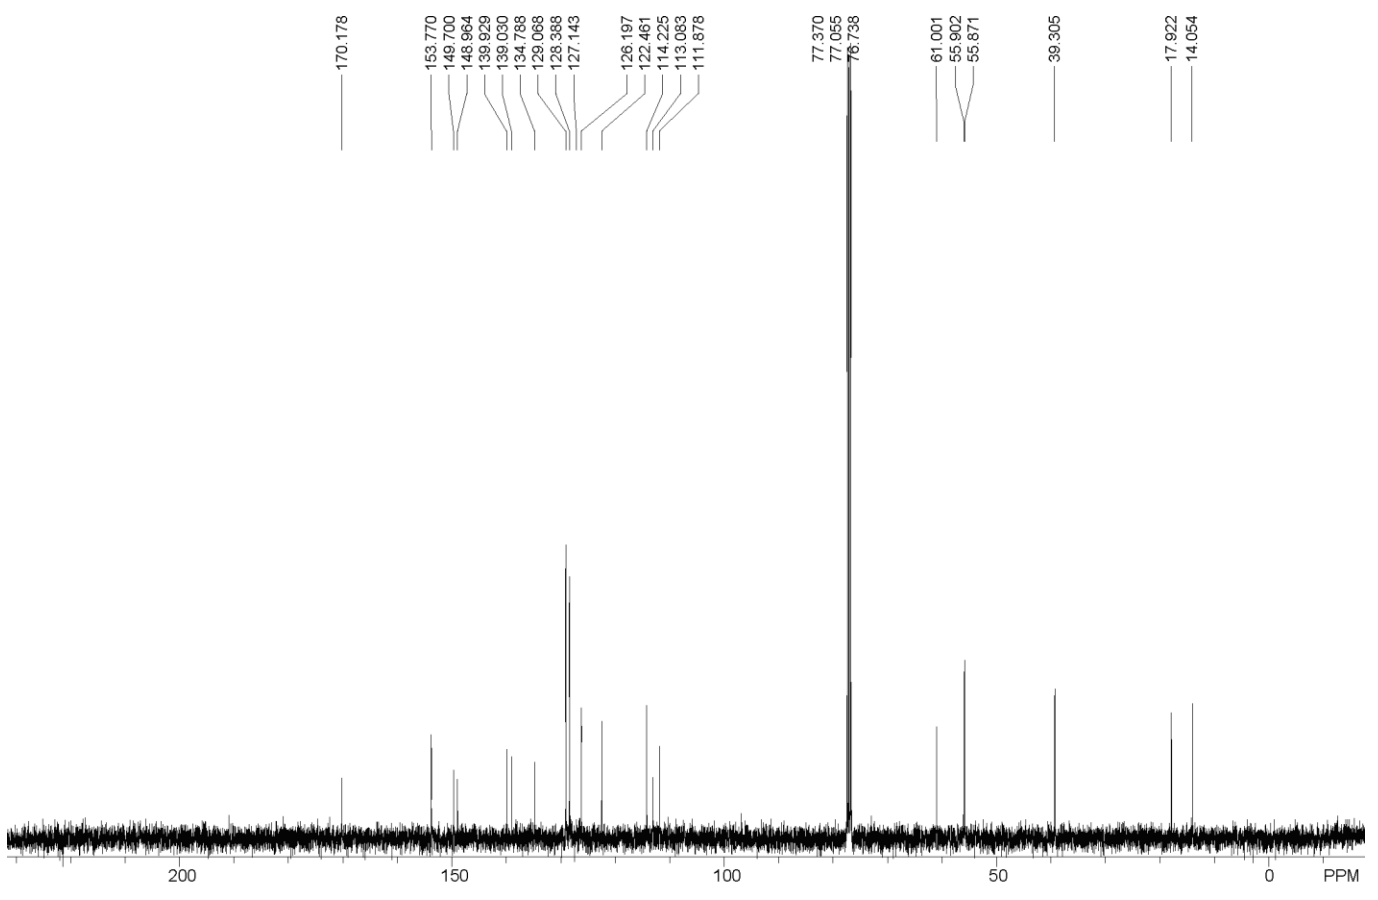

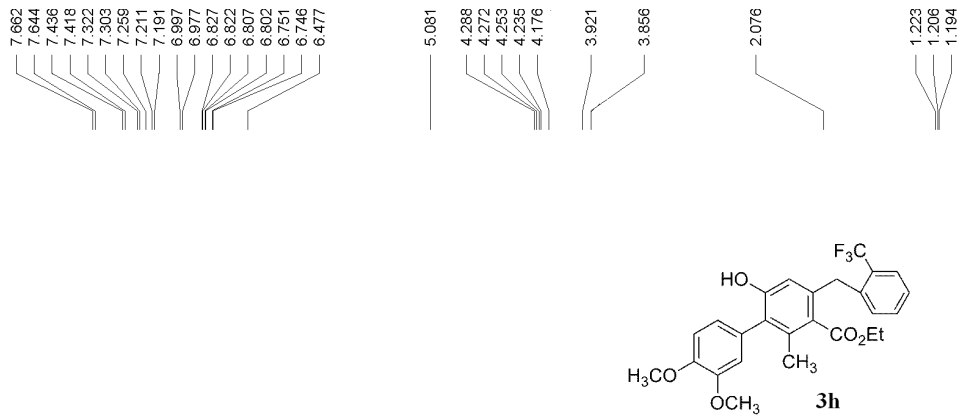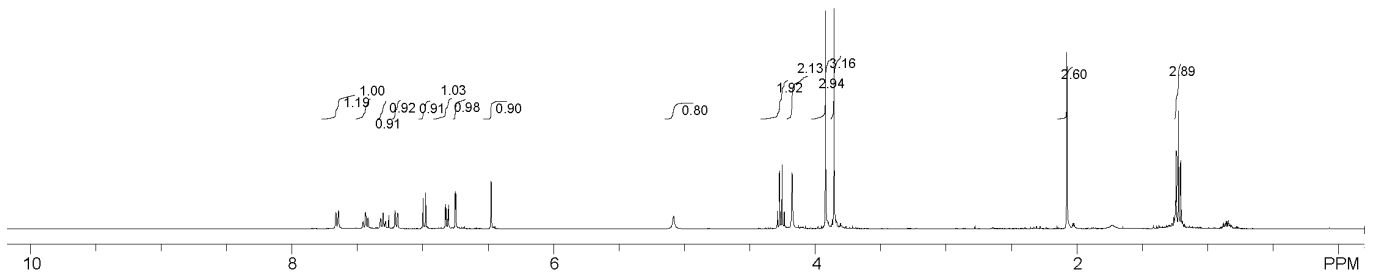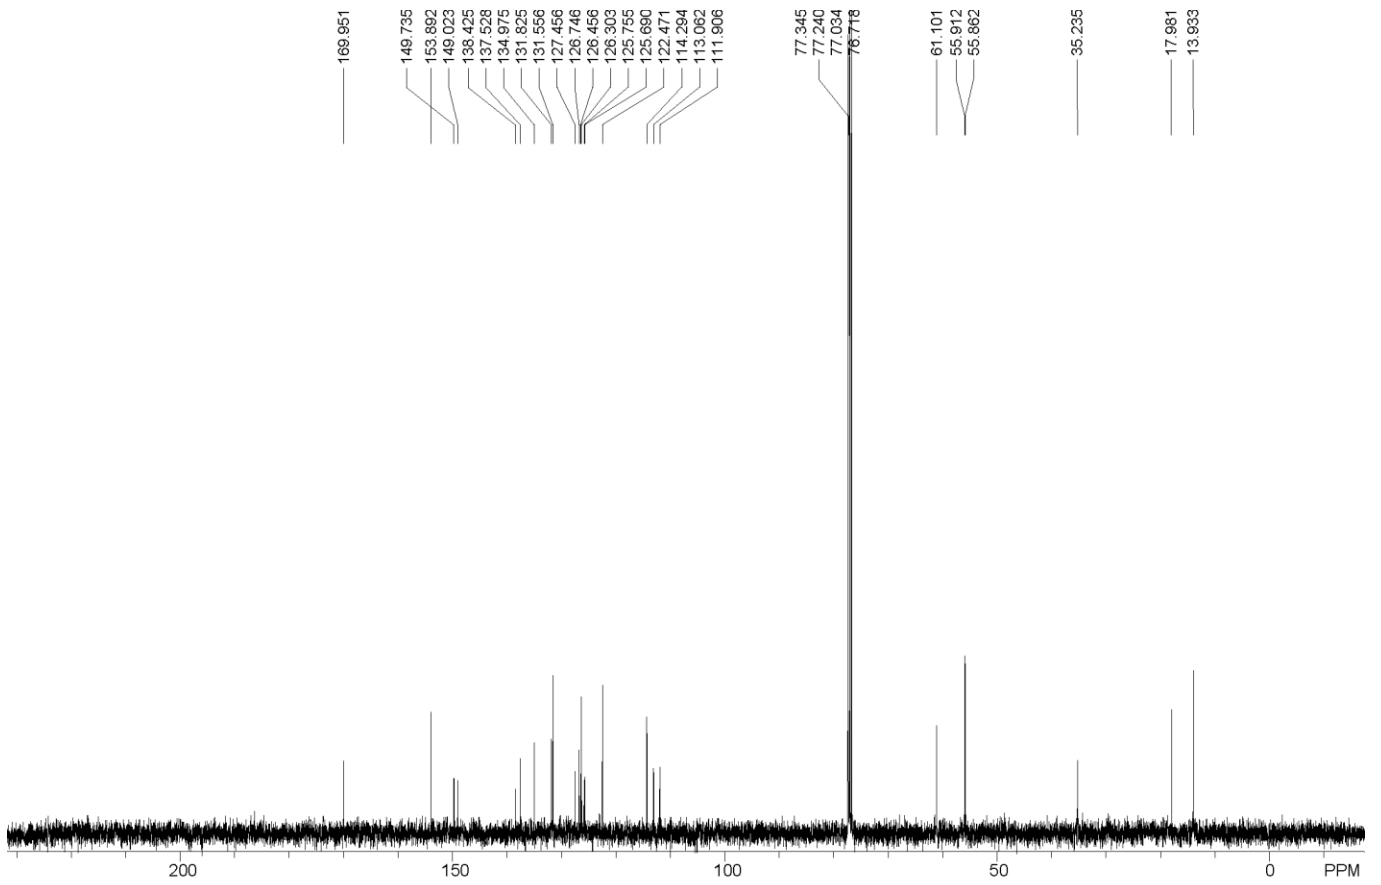

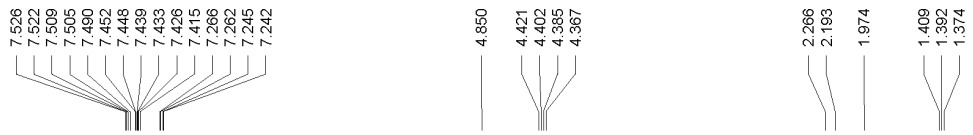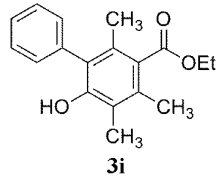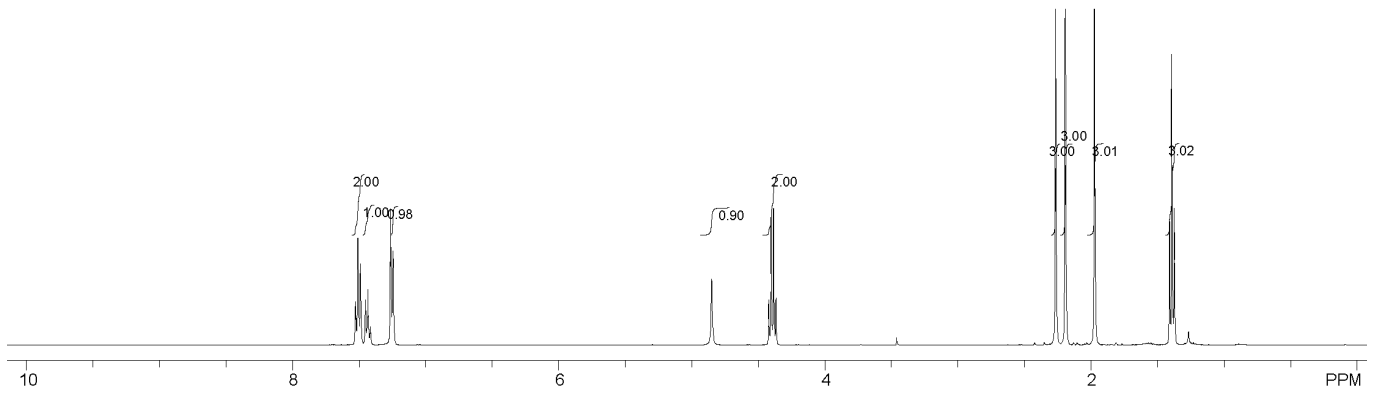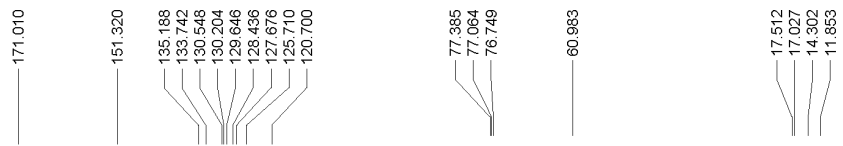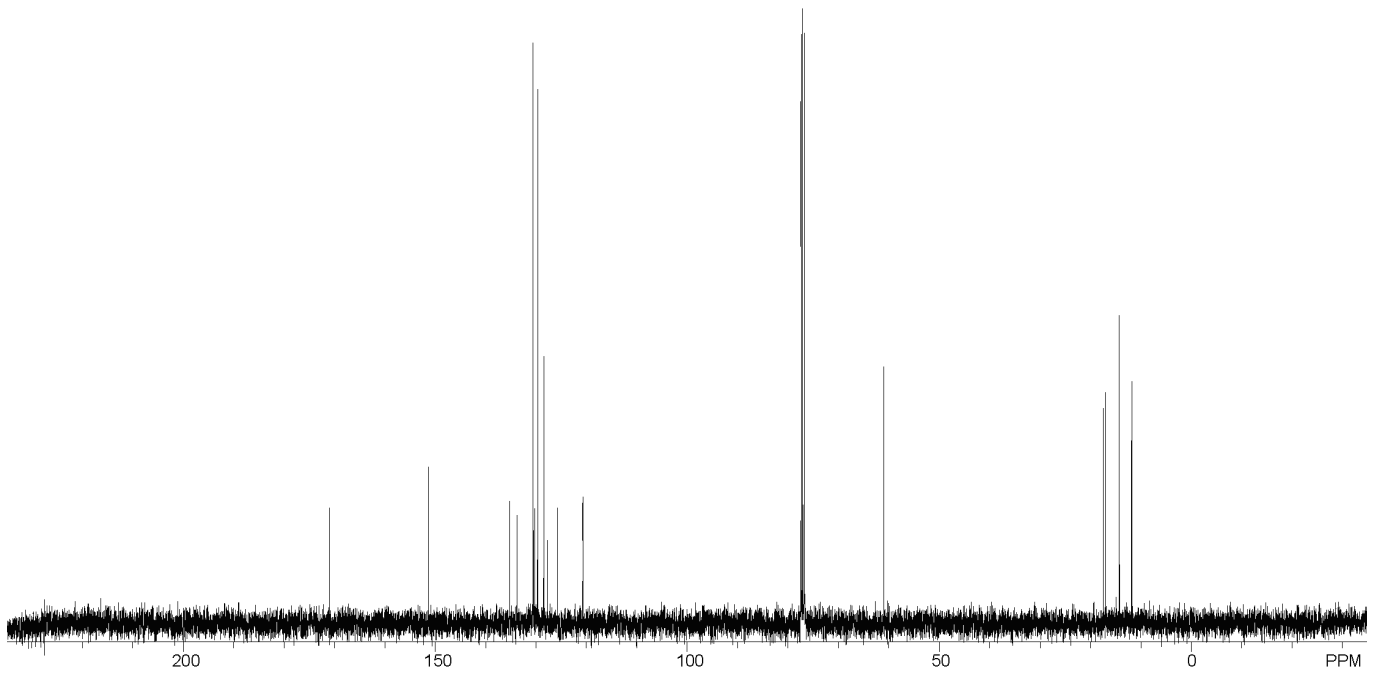

7.542  
7.524  
7.505  
7.464  
7.446  
7.303  
7.299  
7.282

4.874  
4.450  
4.432  
4.414  
4.396

2.749  
2.730  
2.711

2.340  
2.009

1.439  
1.421  
1.403  
1.187  
1.168  
1.148

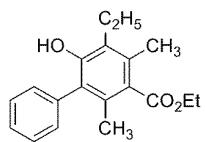

3j

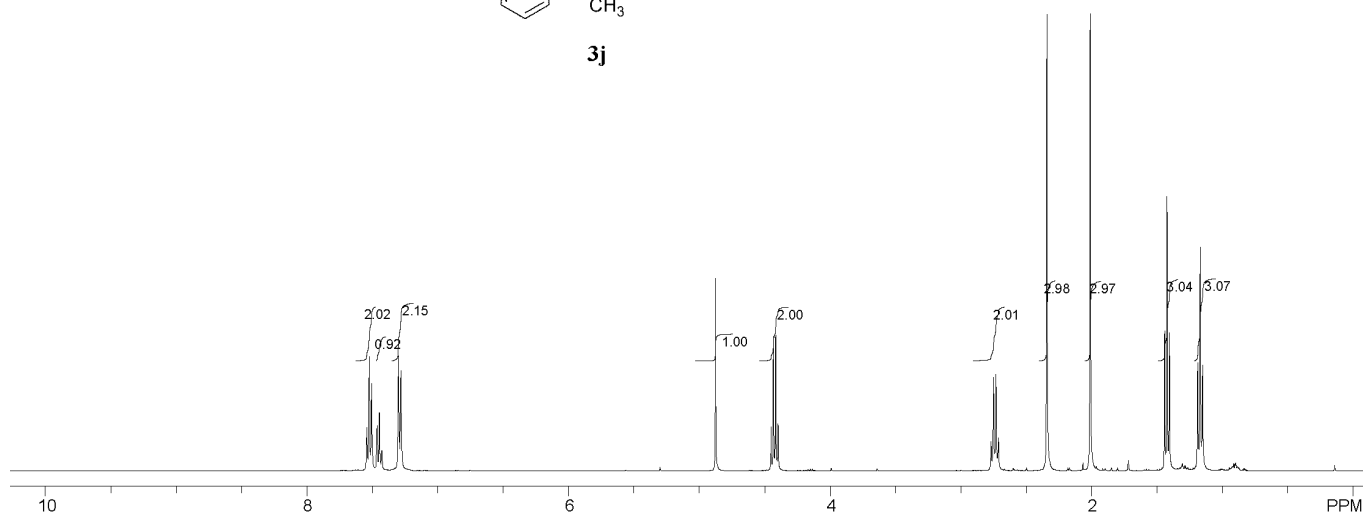

171.031

151.177

135.133  
132.935  
130.563  
130.351  
129.595  
128.392  
127.885  
126.815  
125.897

77.440  
77.121  
76.797

60.945

19.708  
17.592  
16.084  
14.276  
13.416

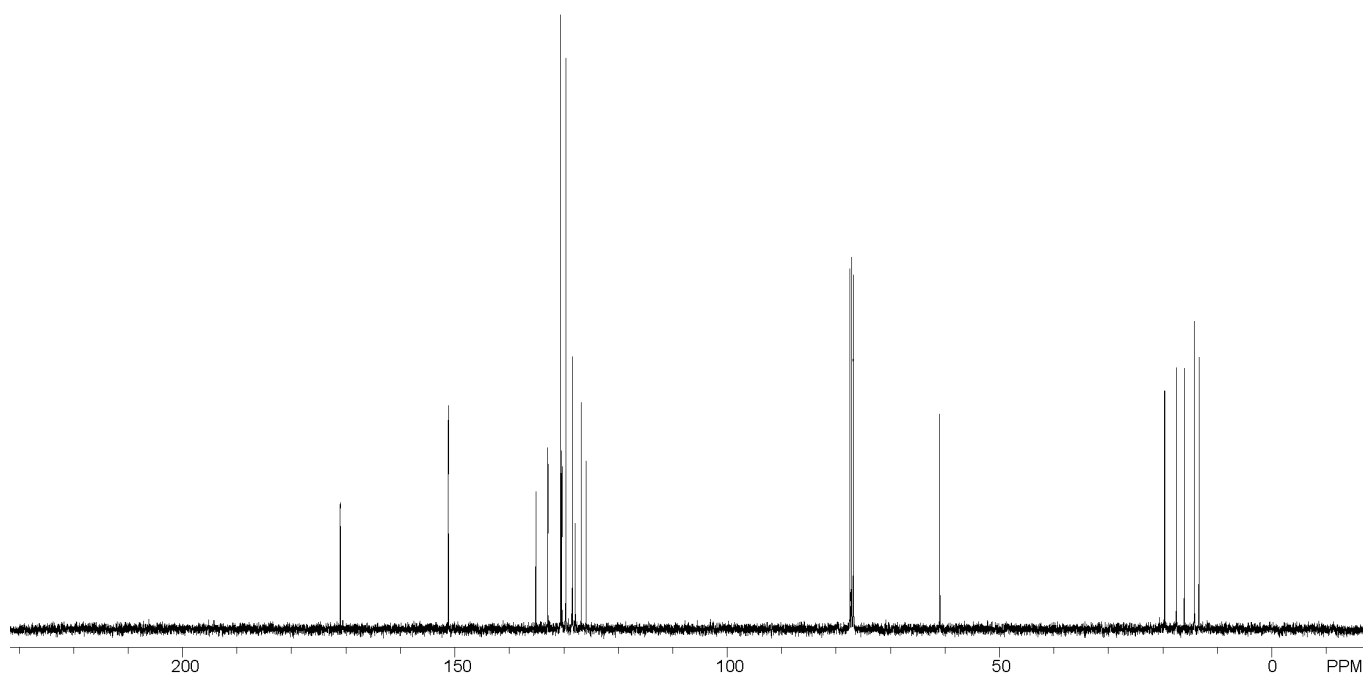

7.53C  
7.517  
7.203  
7.195  
7.192  
7.183  
7.014  
7.006  
6.774

5.987

2.719  
2.703  
2.686  
2.657  
2.586  
2.57C  
2.553  
1.964  
1.948  
1.932  
1.917

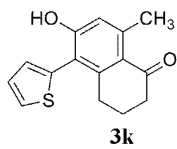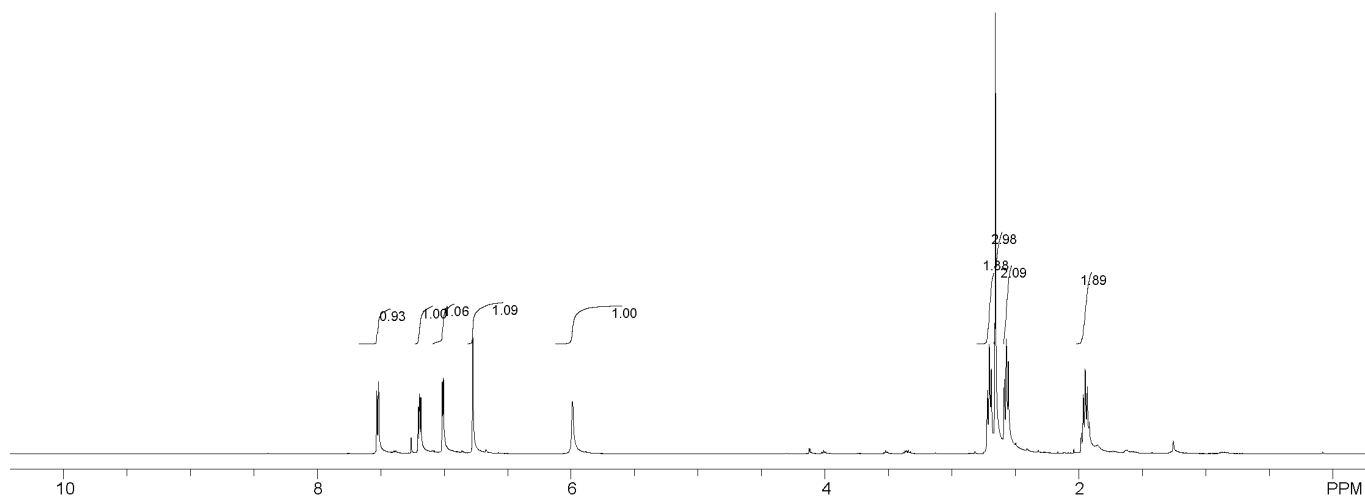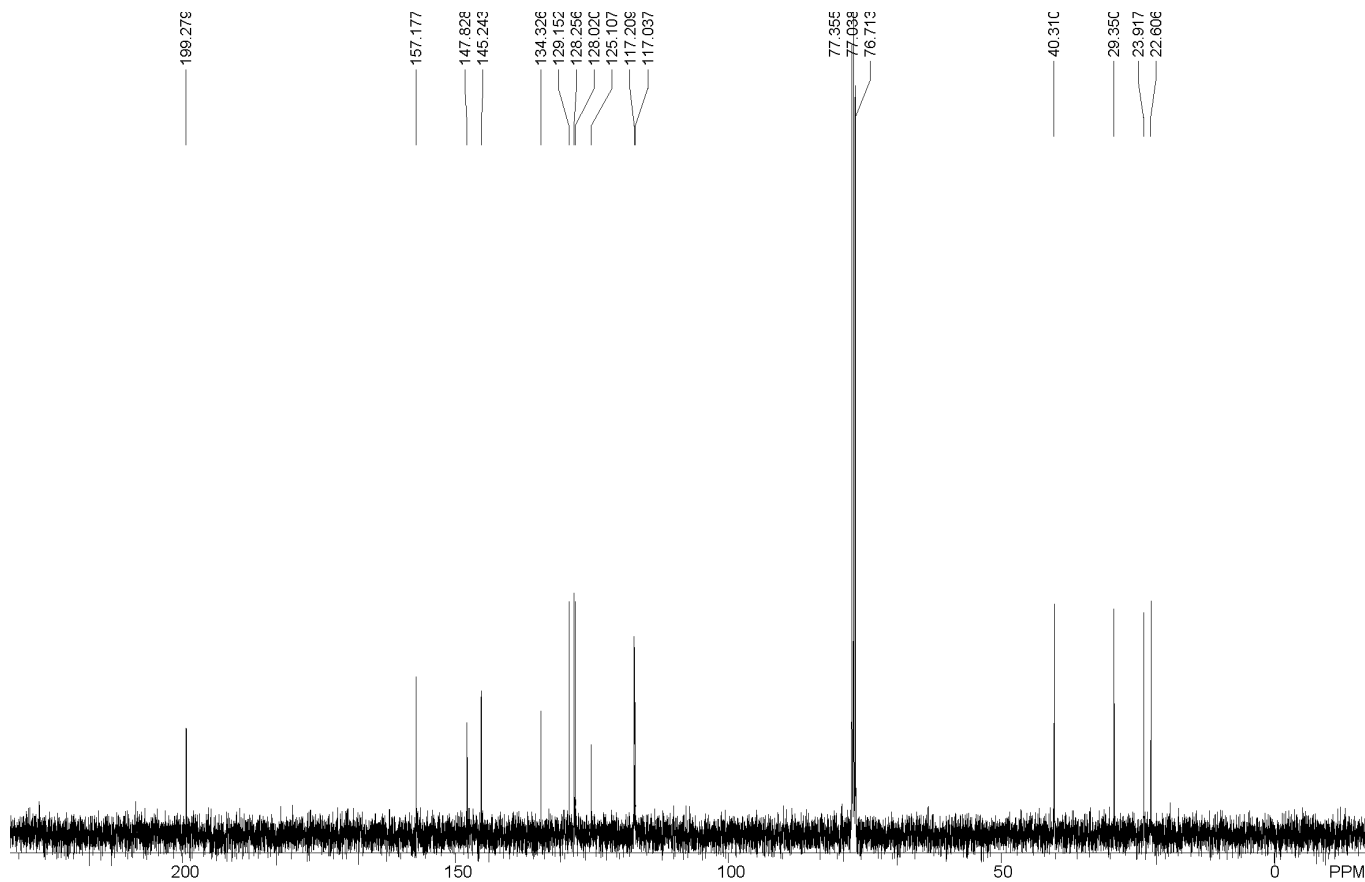

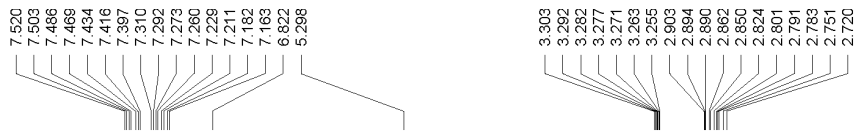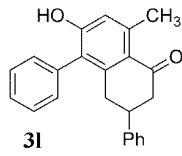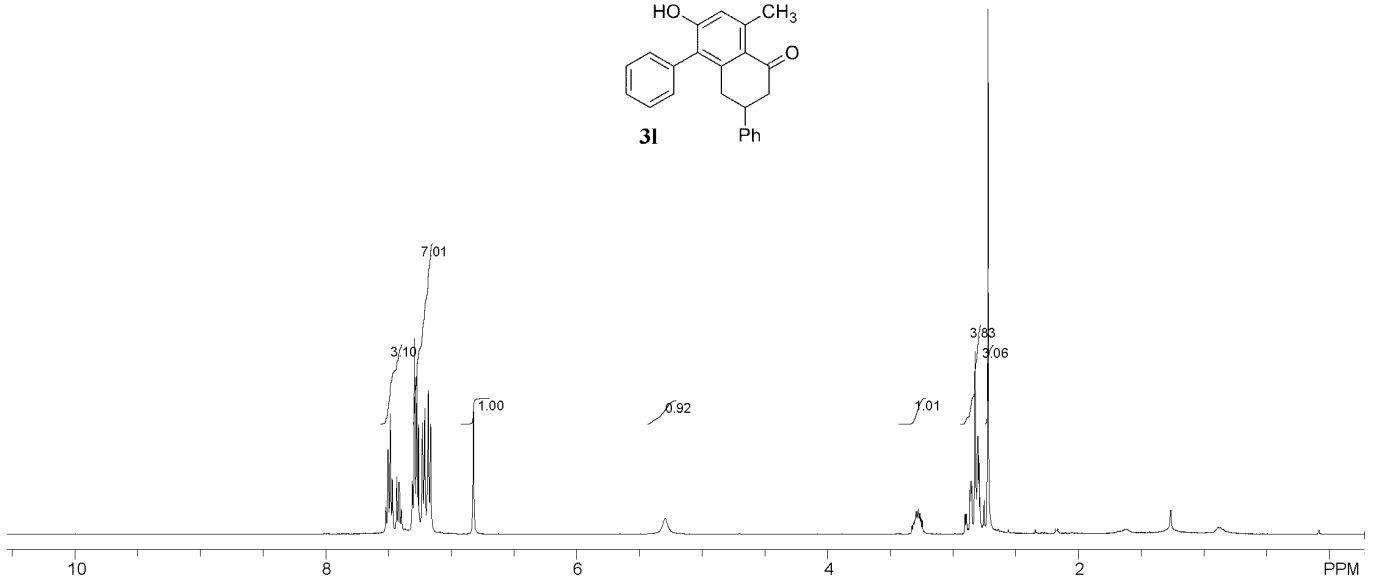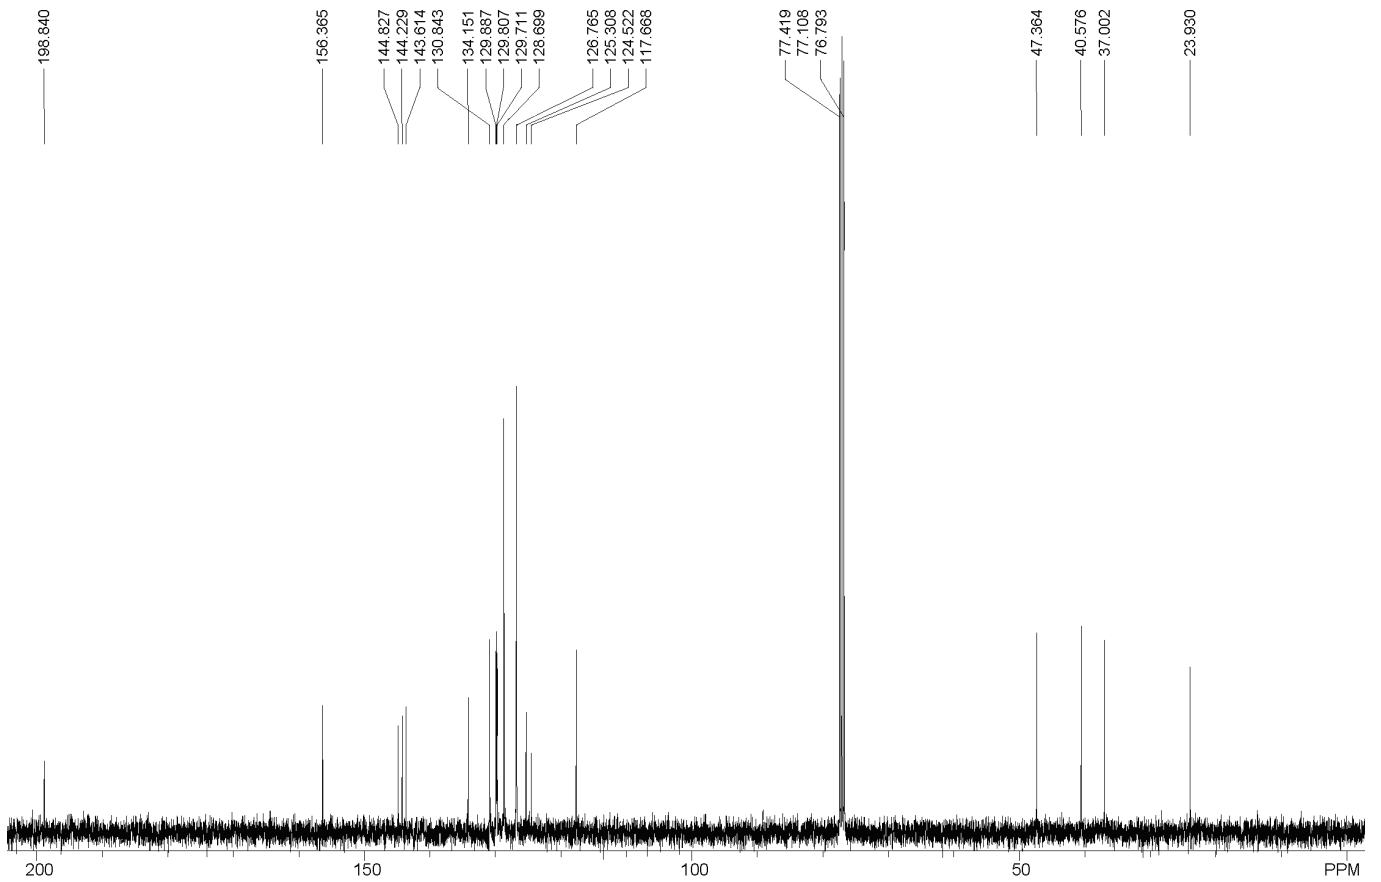



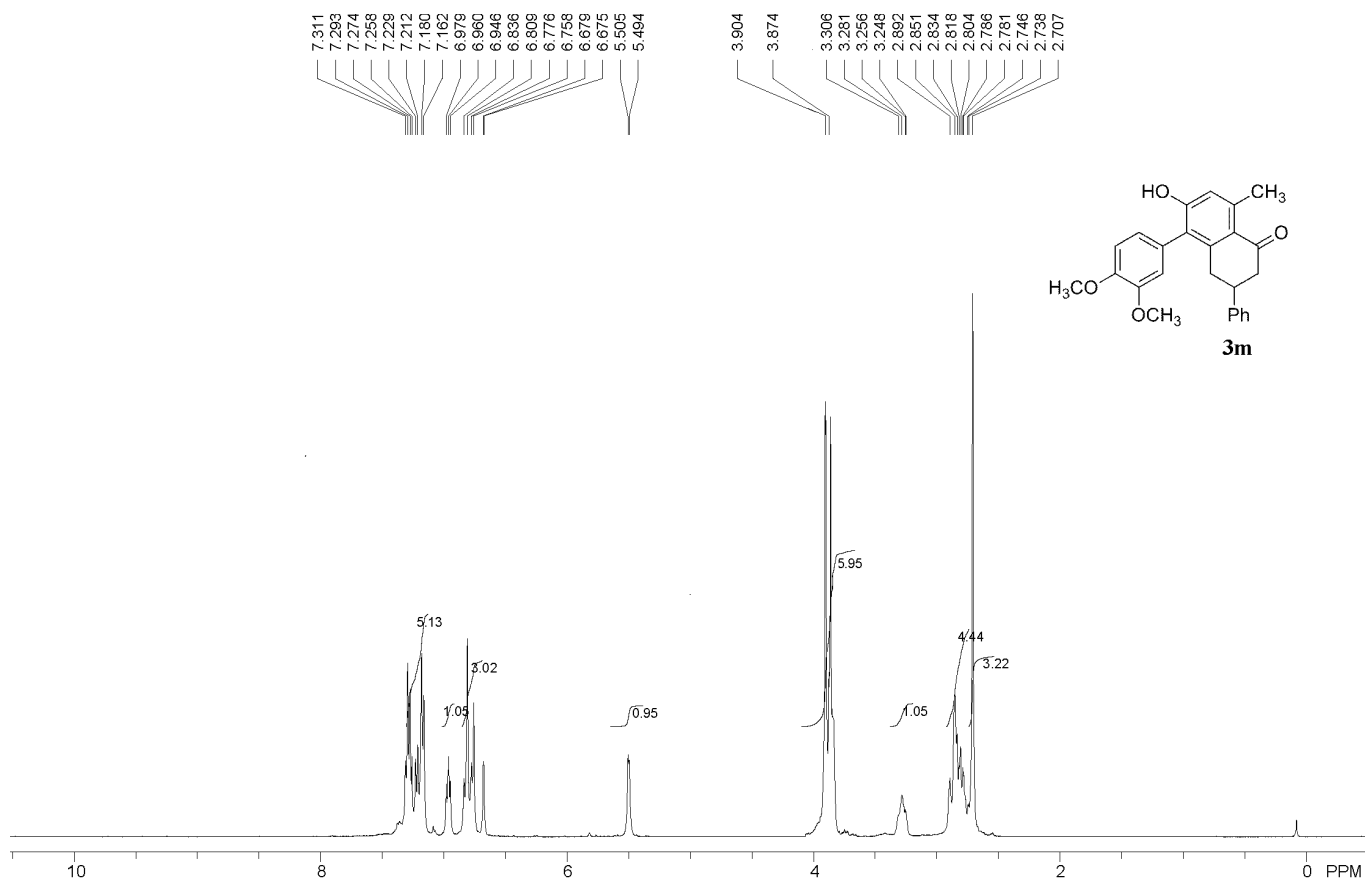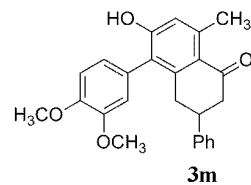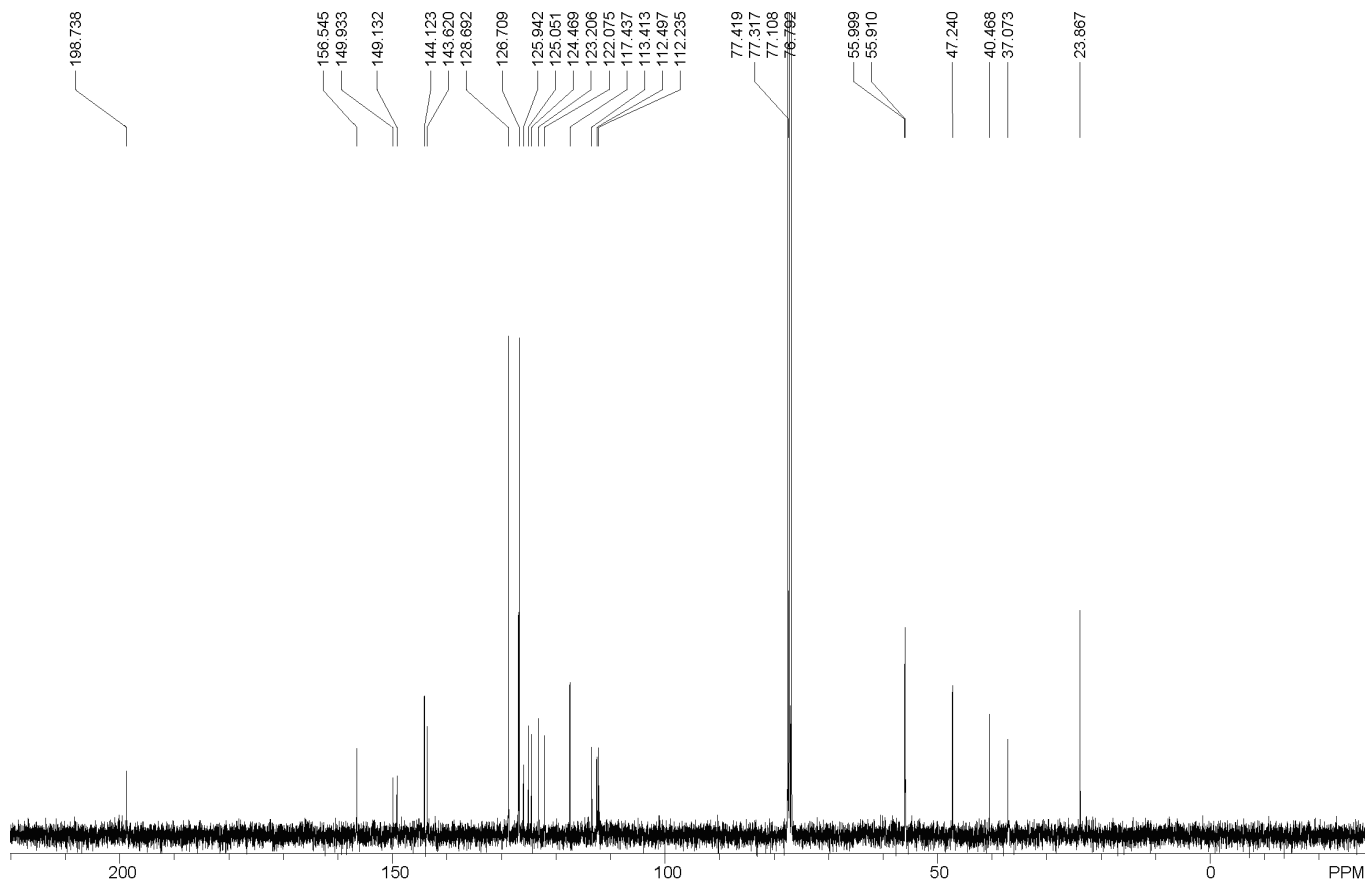

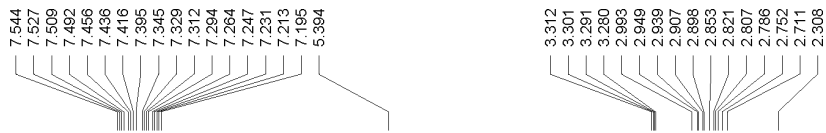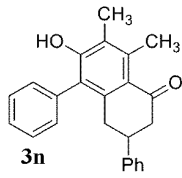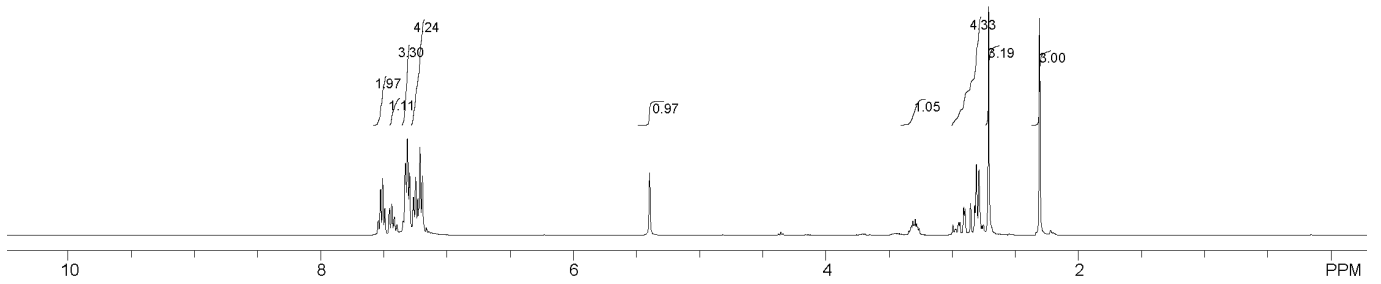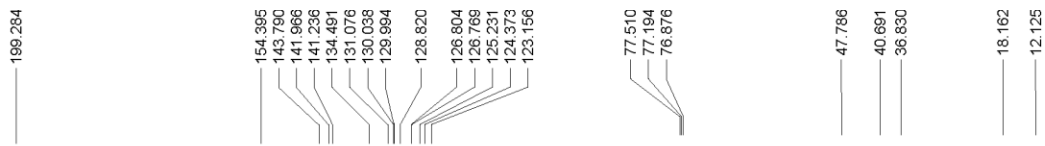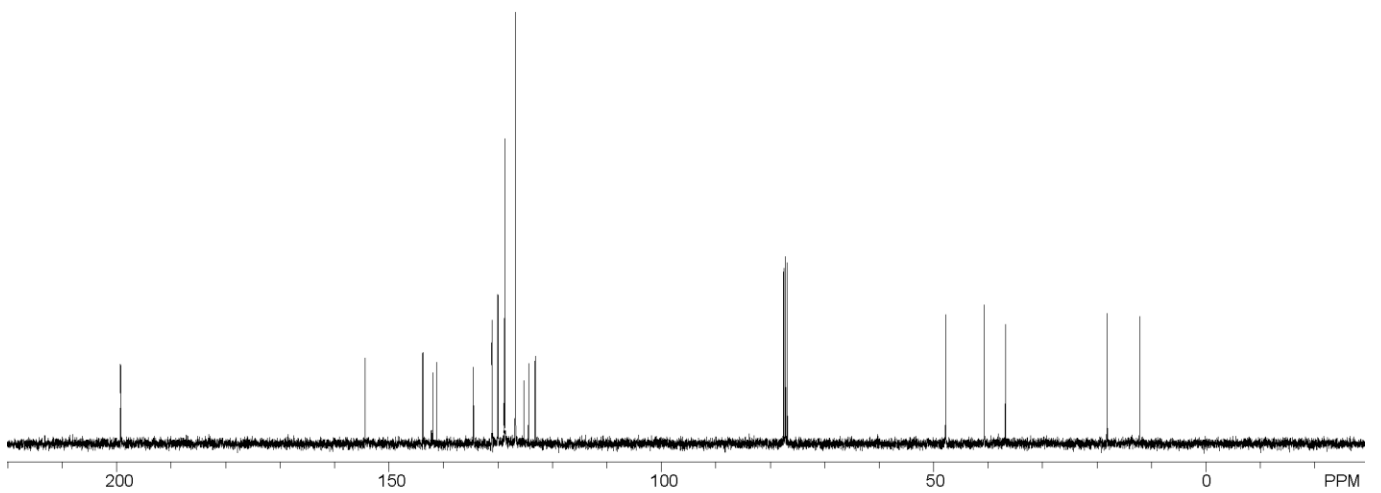

7.524  
7.520  
7.506  
7.487  
7.438  
7.434  
7.424  
7.419  
7.414  
7.401  
7.308  
7.305  
7.287  
7.259  
6.711  
6.704

4.746

2.342  
2.060

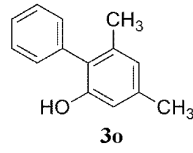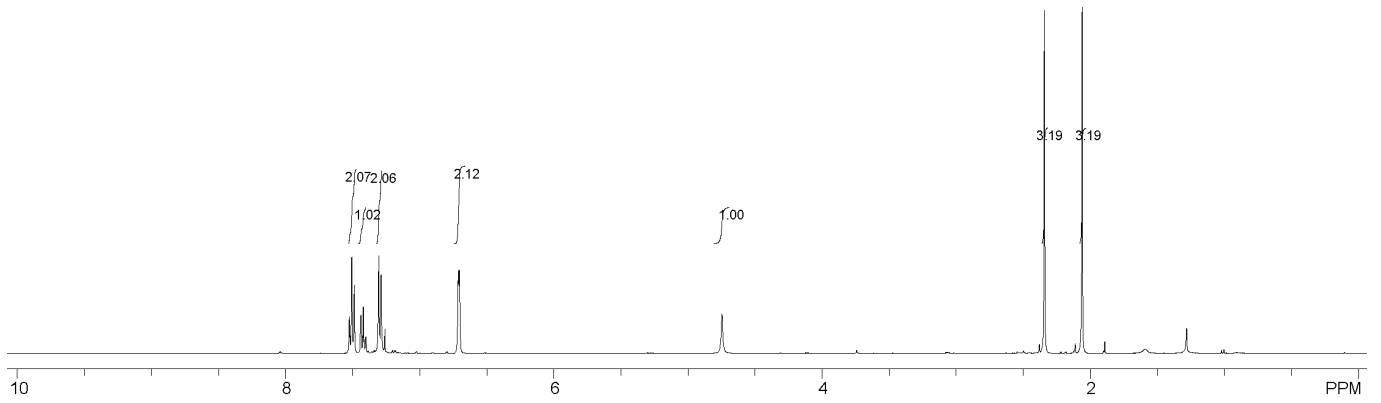

152.712  
138.619  
136.954  
135.421  
130.489  
129.406  
128.054  
125.284  
122.831  
113.264

77.382  
77.074  
76.749

21.239  
20.328

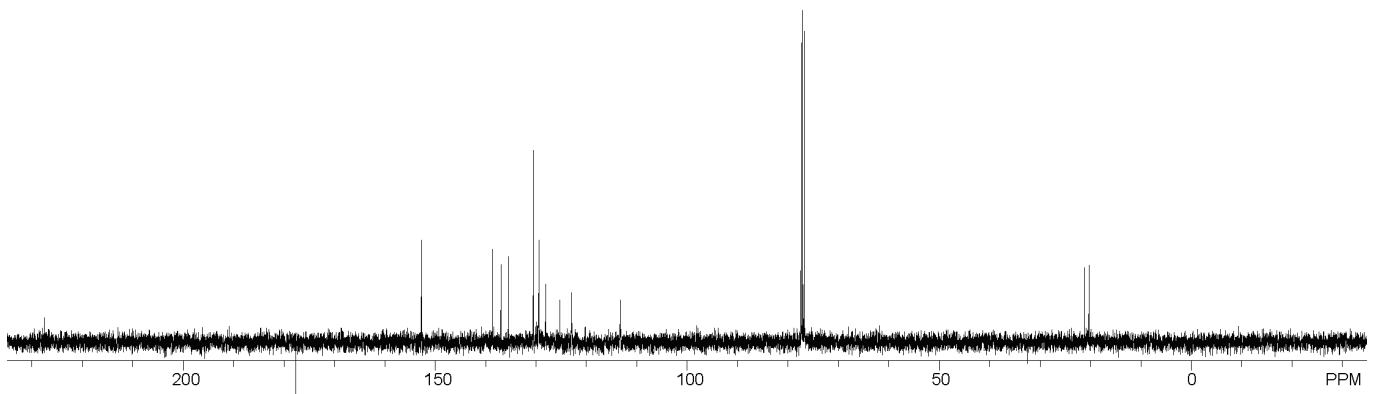

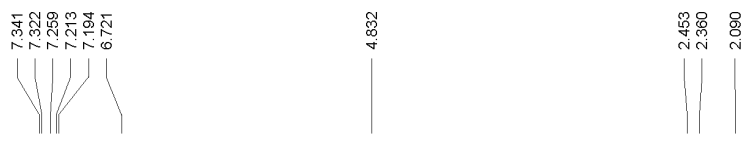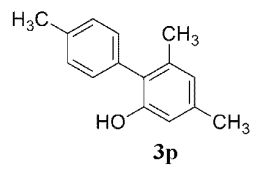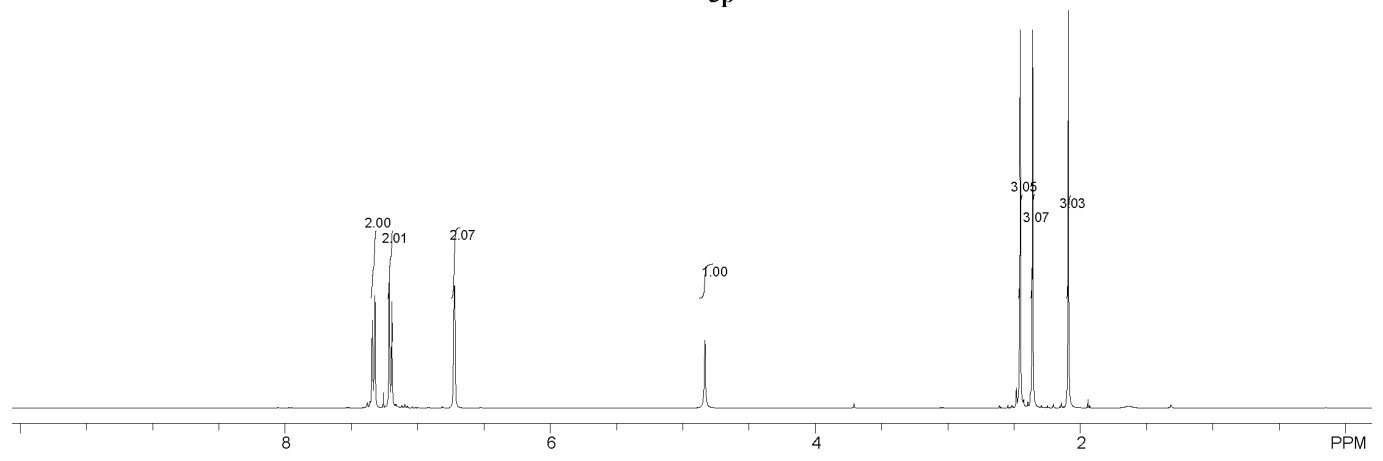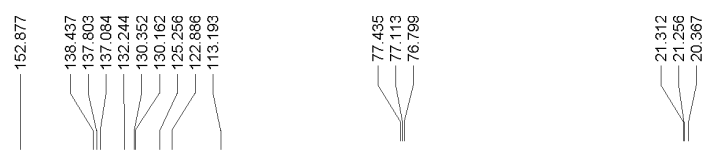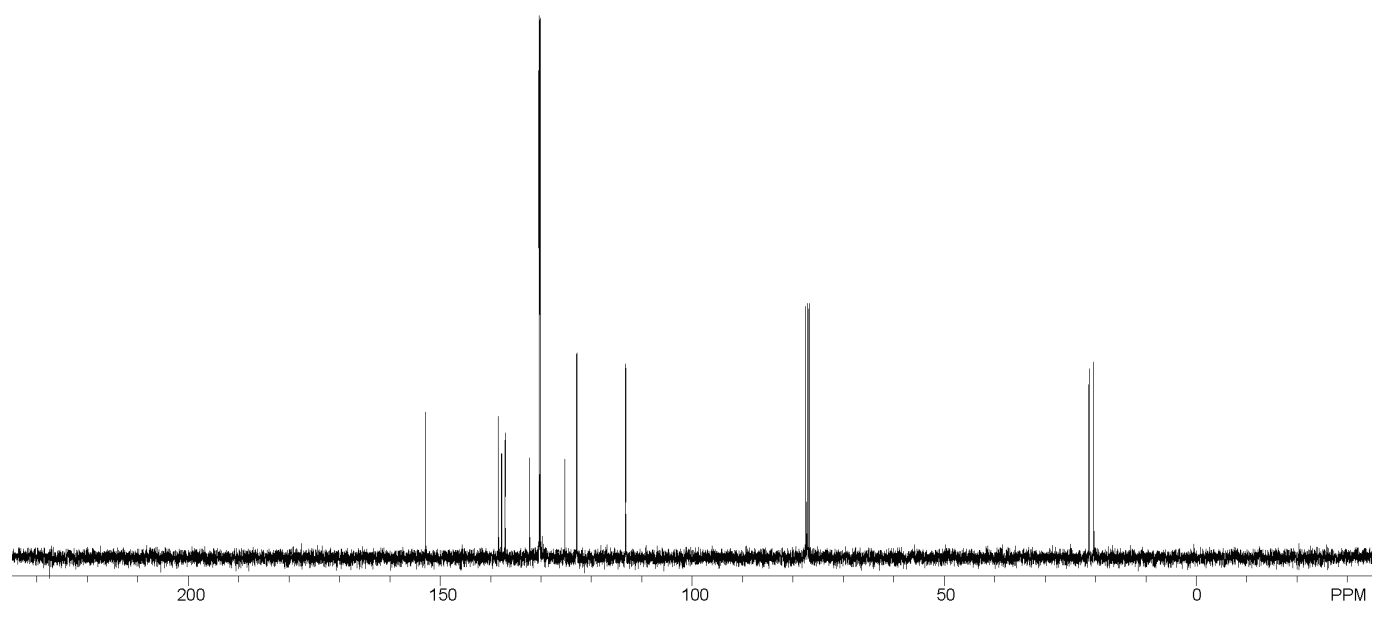

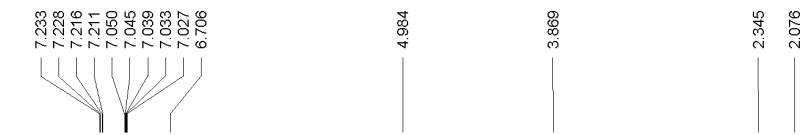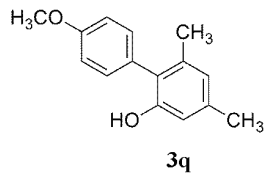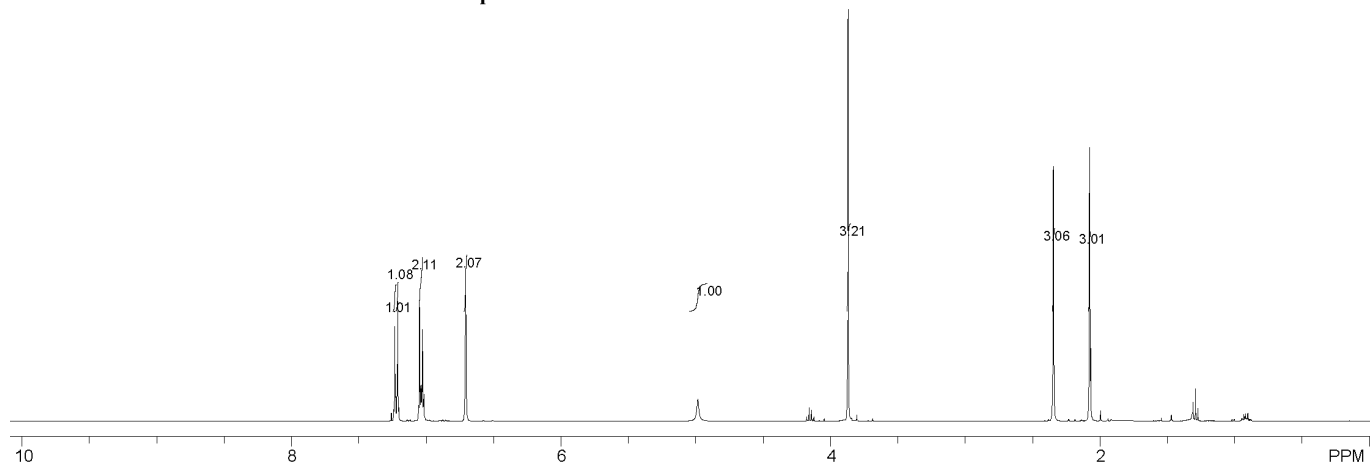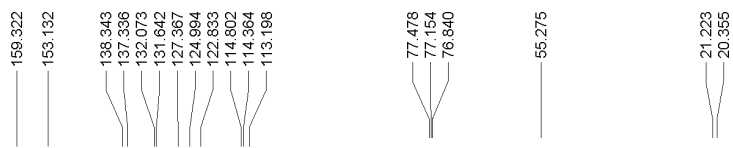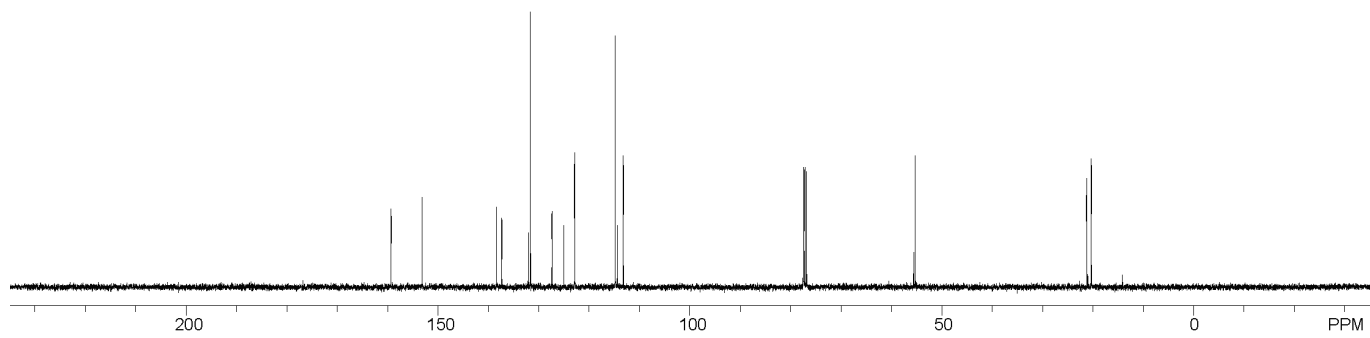

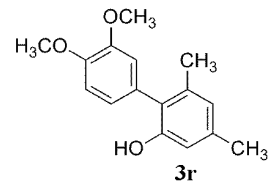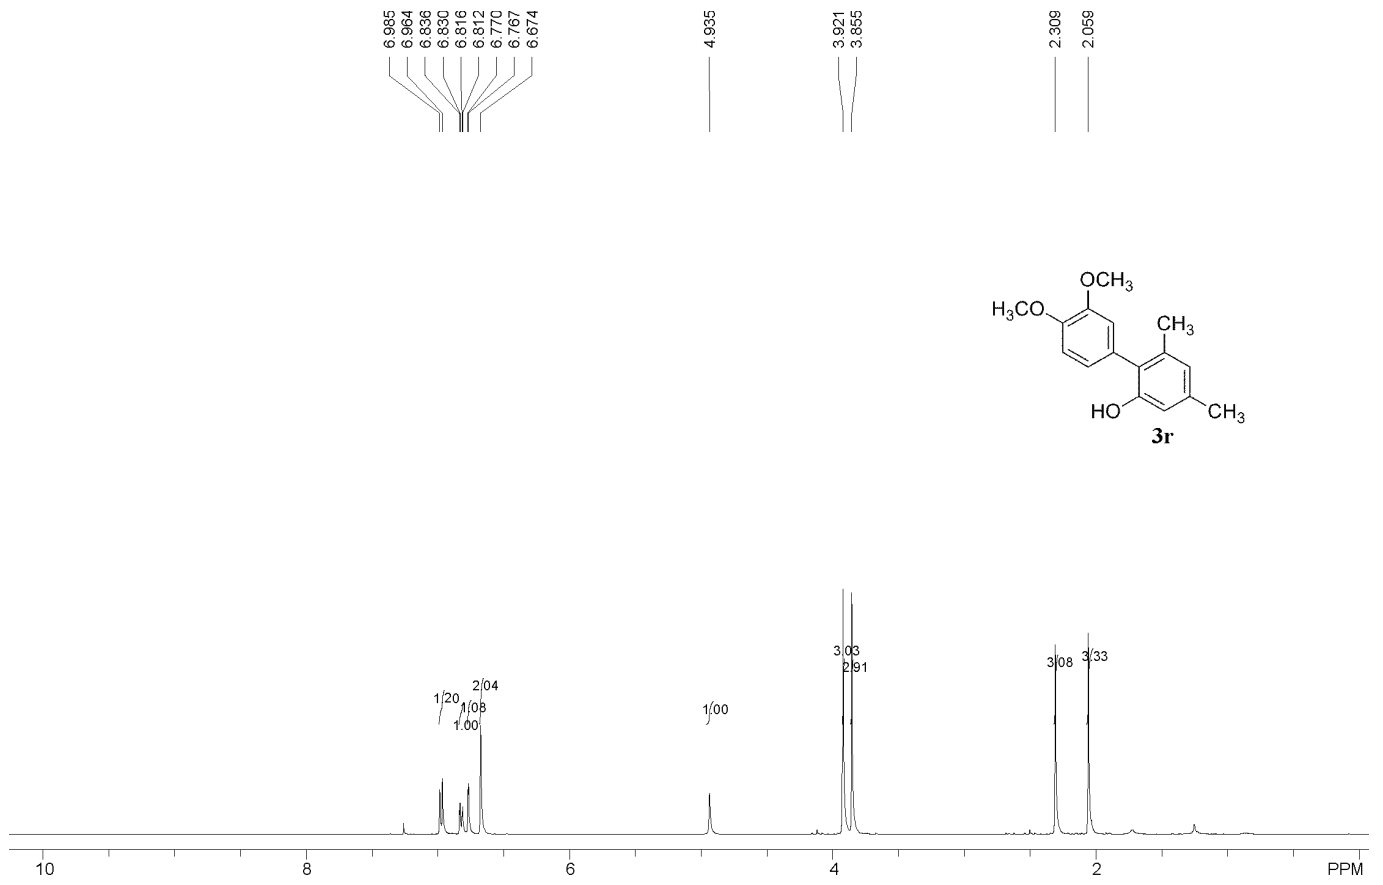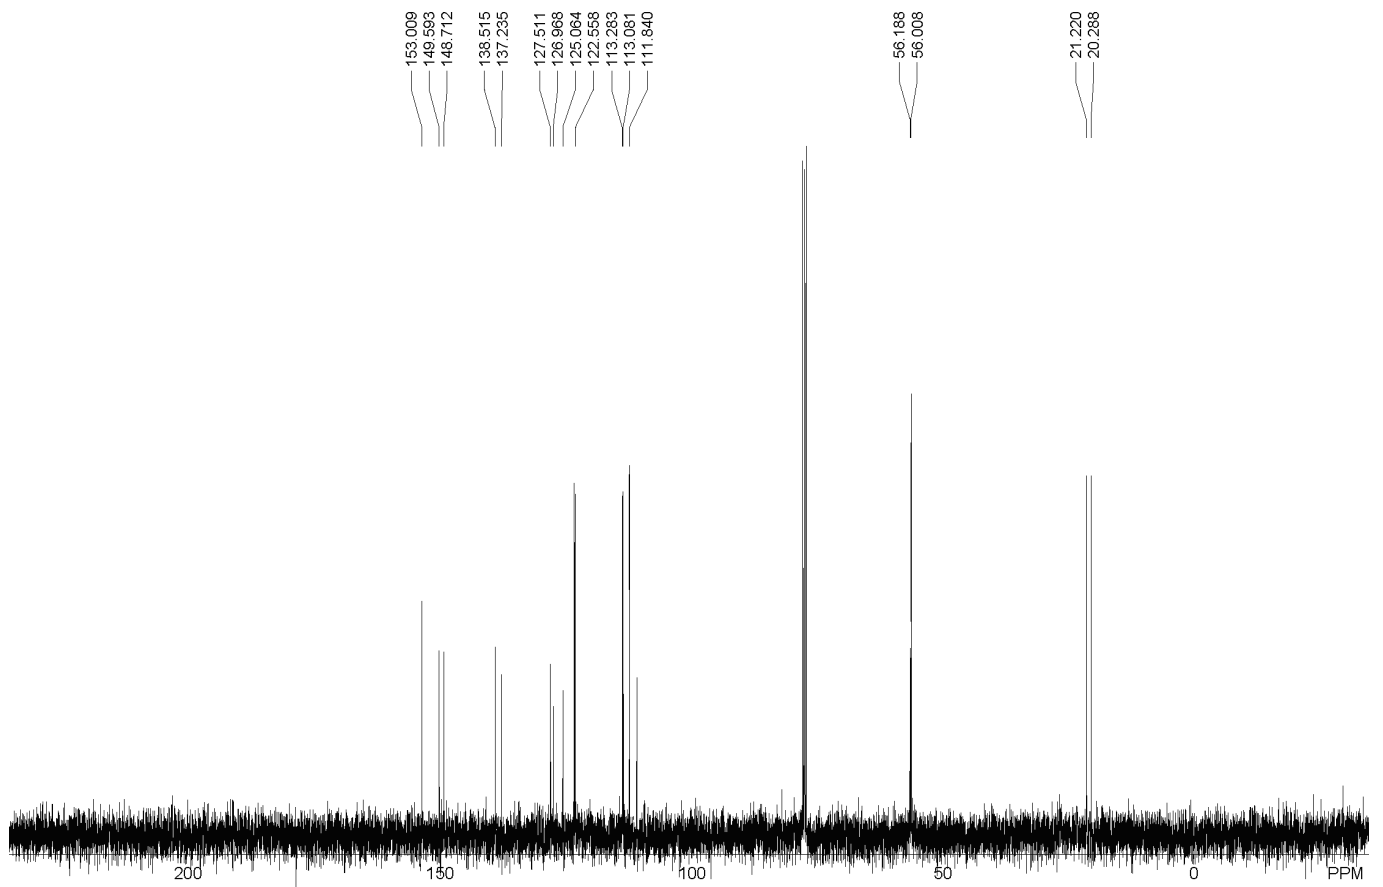

7.623  
7.604  
7.586  
7.534  
7.531  
7.516  
7.497  
7.425  
7.407  
6.824

4.871  
4.864

2.853  
2.834  
2.815  
2.797  
2.456

2.140

1.315  
1.307  
1.296  
1.278

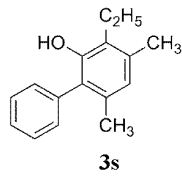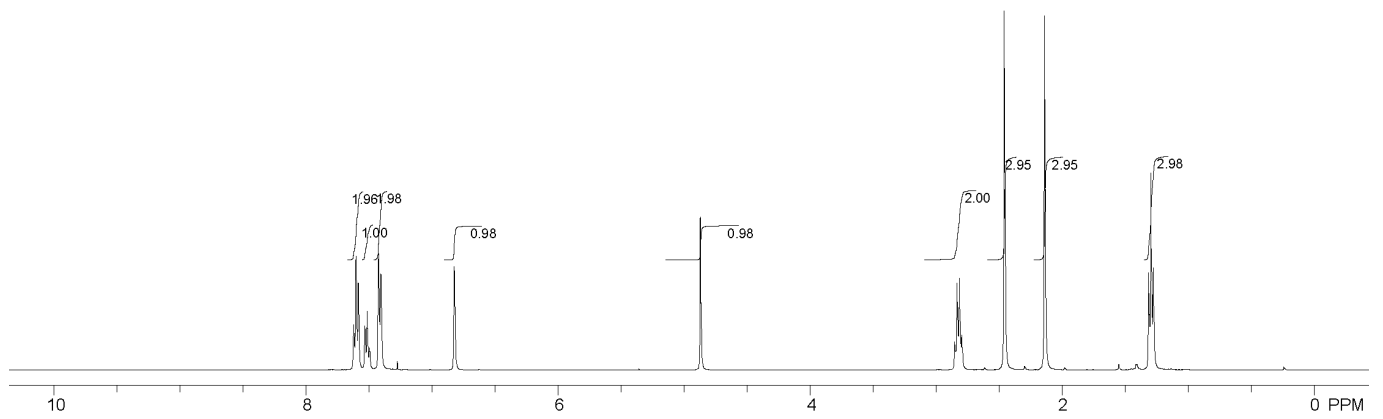

150.574  
136.371  
135.957  
133.638  
130.635  
129.521  
128.108  
126.280  
125.877  
123.535

77.466  
77.150  
76.831

20.121  
19.874  
19.185  
13.666

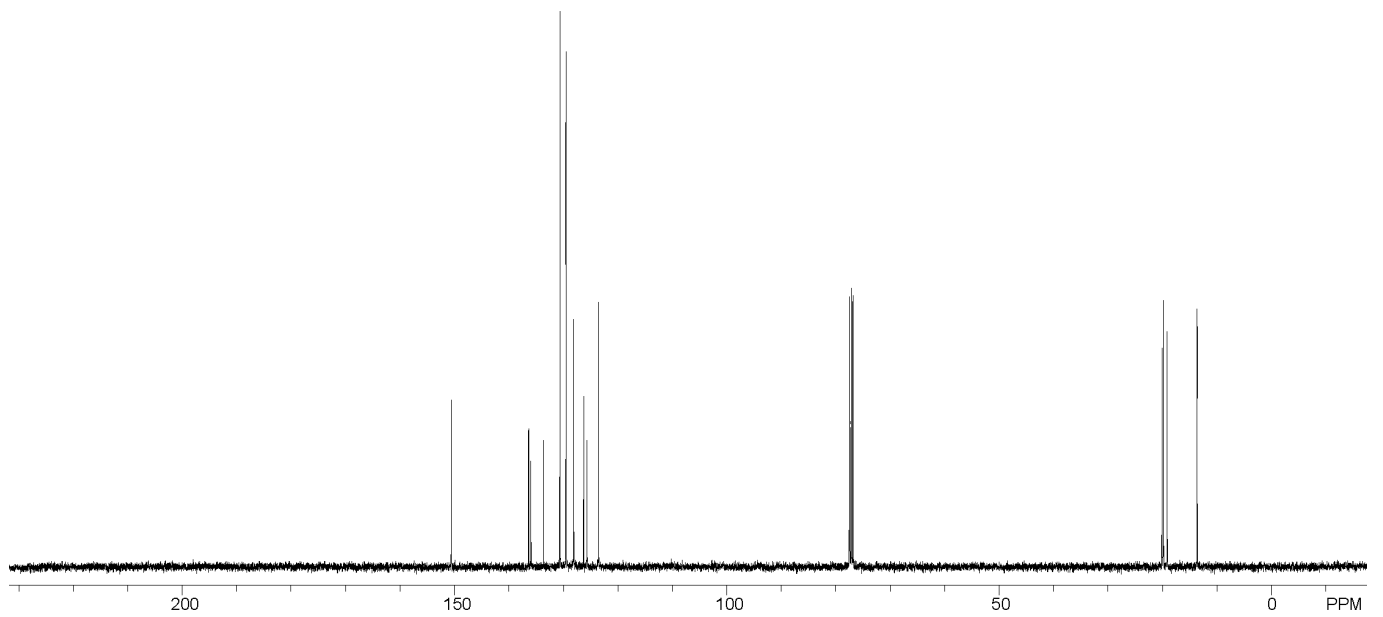

7.526  
7.508  
7.477  
7.458  
7.258  
7.238  
7.218  
6.779

2.518  
2.241

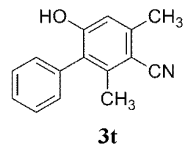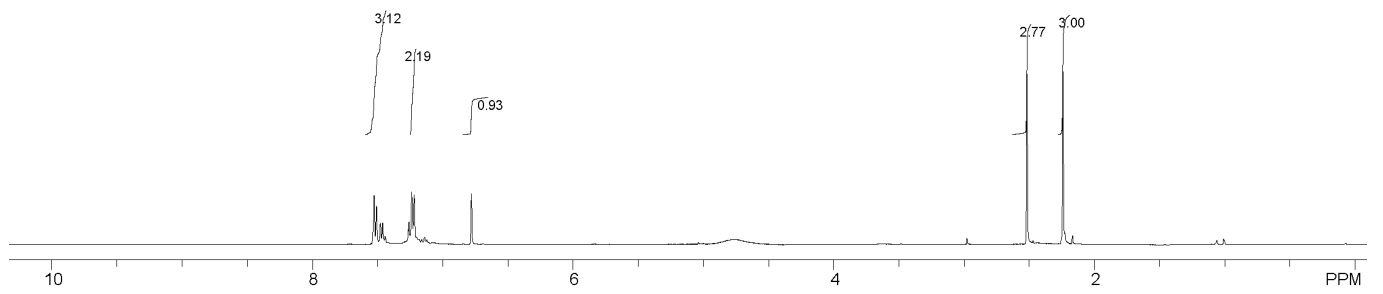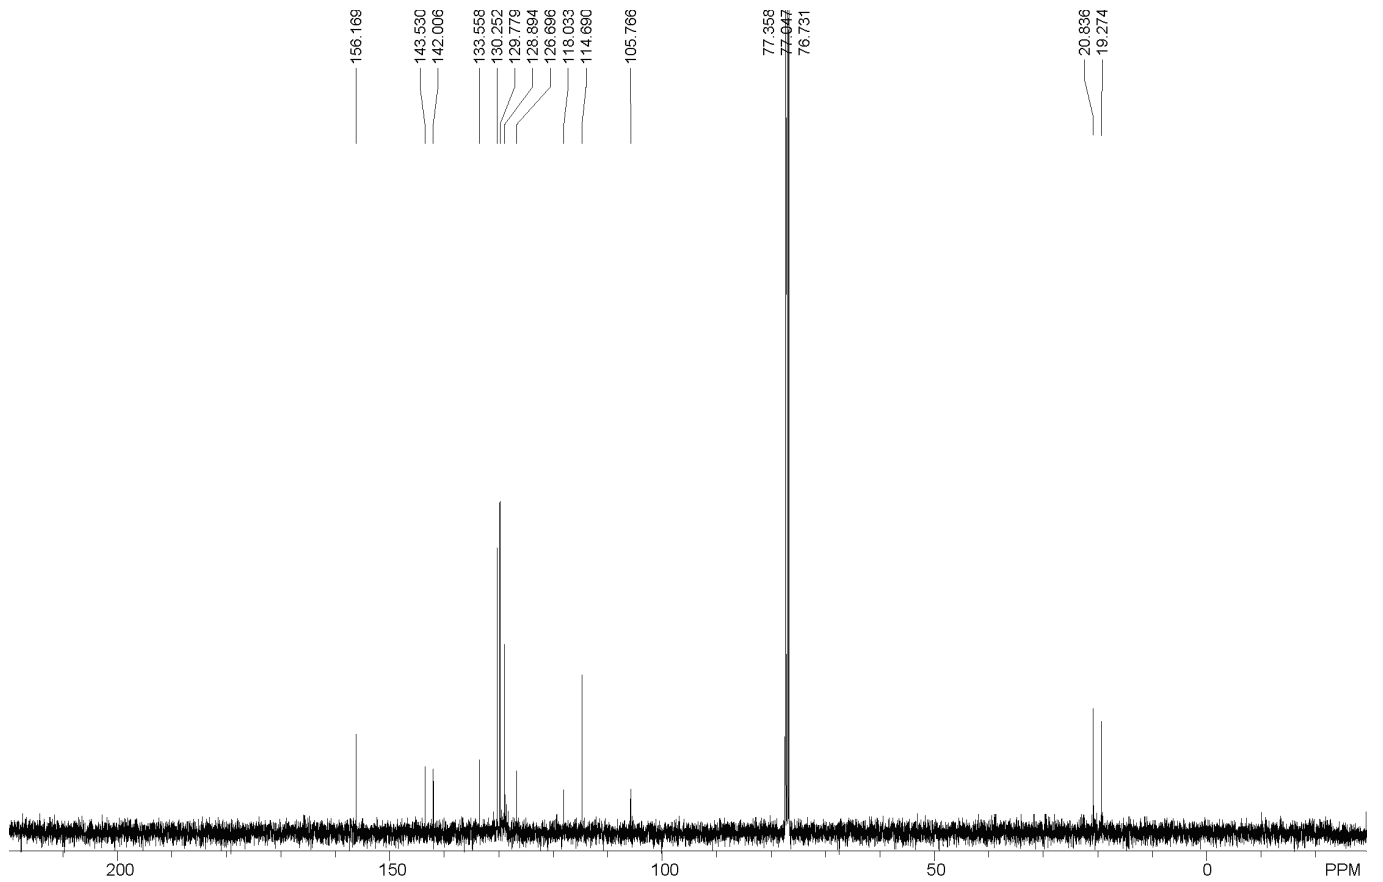



7.562  
7.545  
7.528  
7.495  
7.477  
7.275  
7.271  
7.249  
7.232

5.253

2.518  
2.218  
2.207

1.269

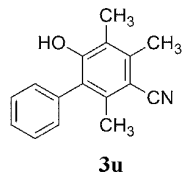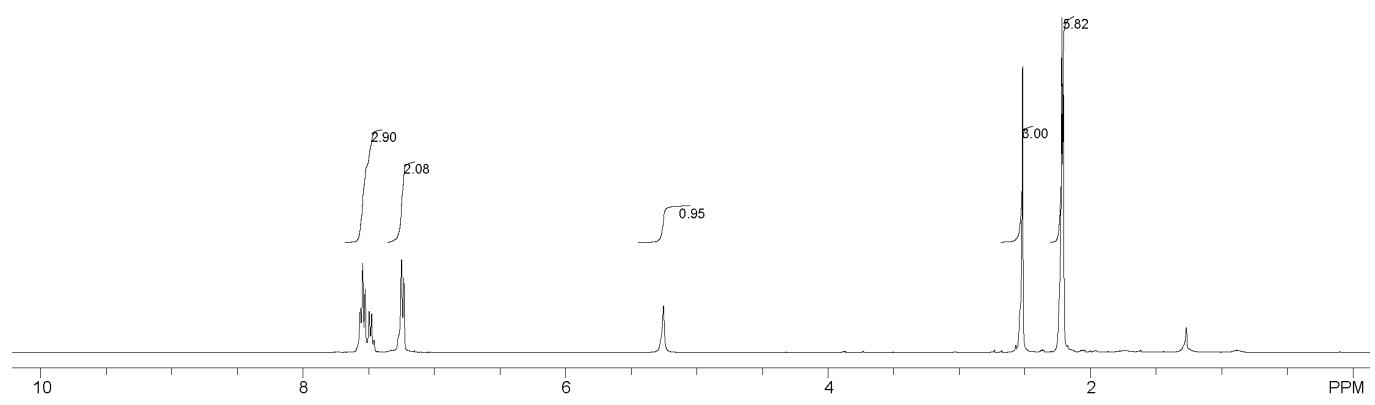

154.143

141.485

138.508

134.007

130.334

129.911

128.869

126.317

121.578

118.701

105.883

77.422

77.104

76.779

19.138

18.543

12.050

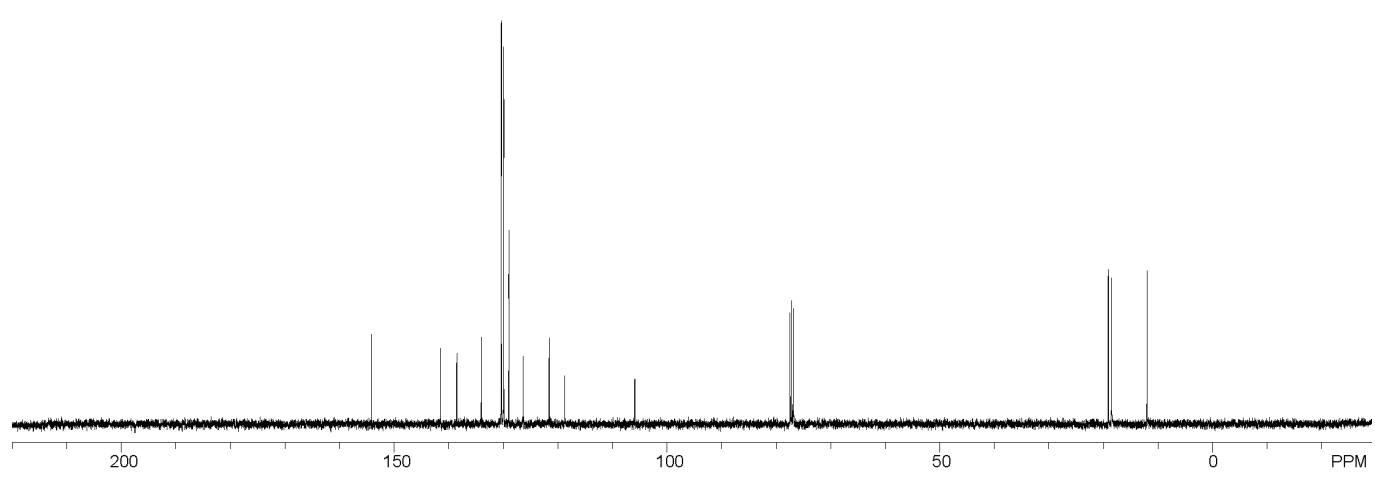

#### IV. Copies of $^1\text{H}$ and $^{13}\text{C}$ NMR spectra of 4a-4r

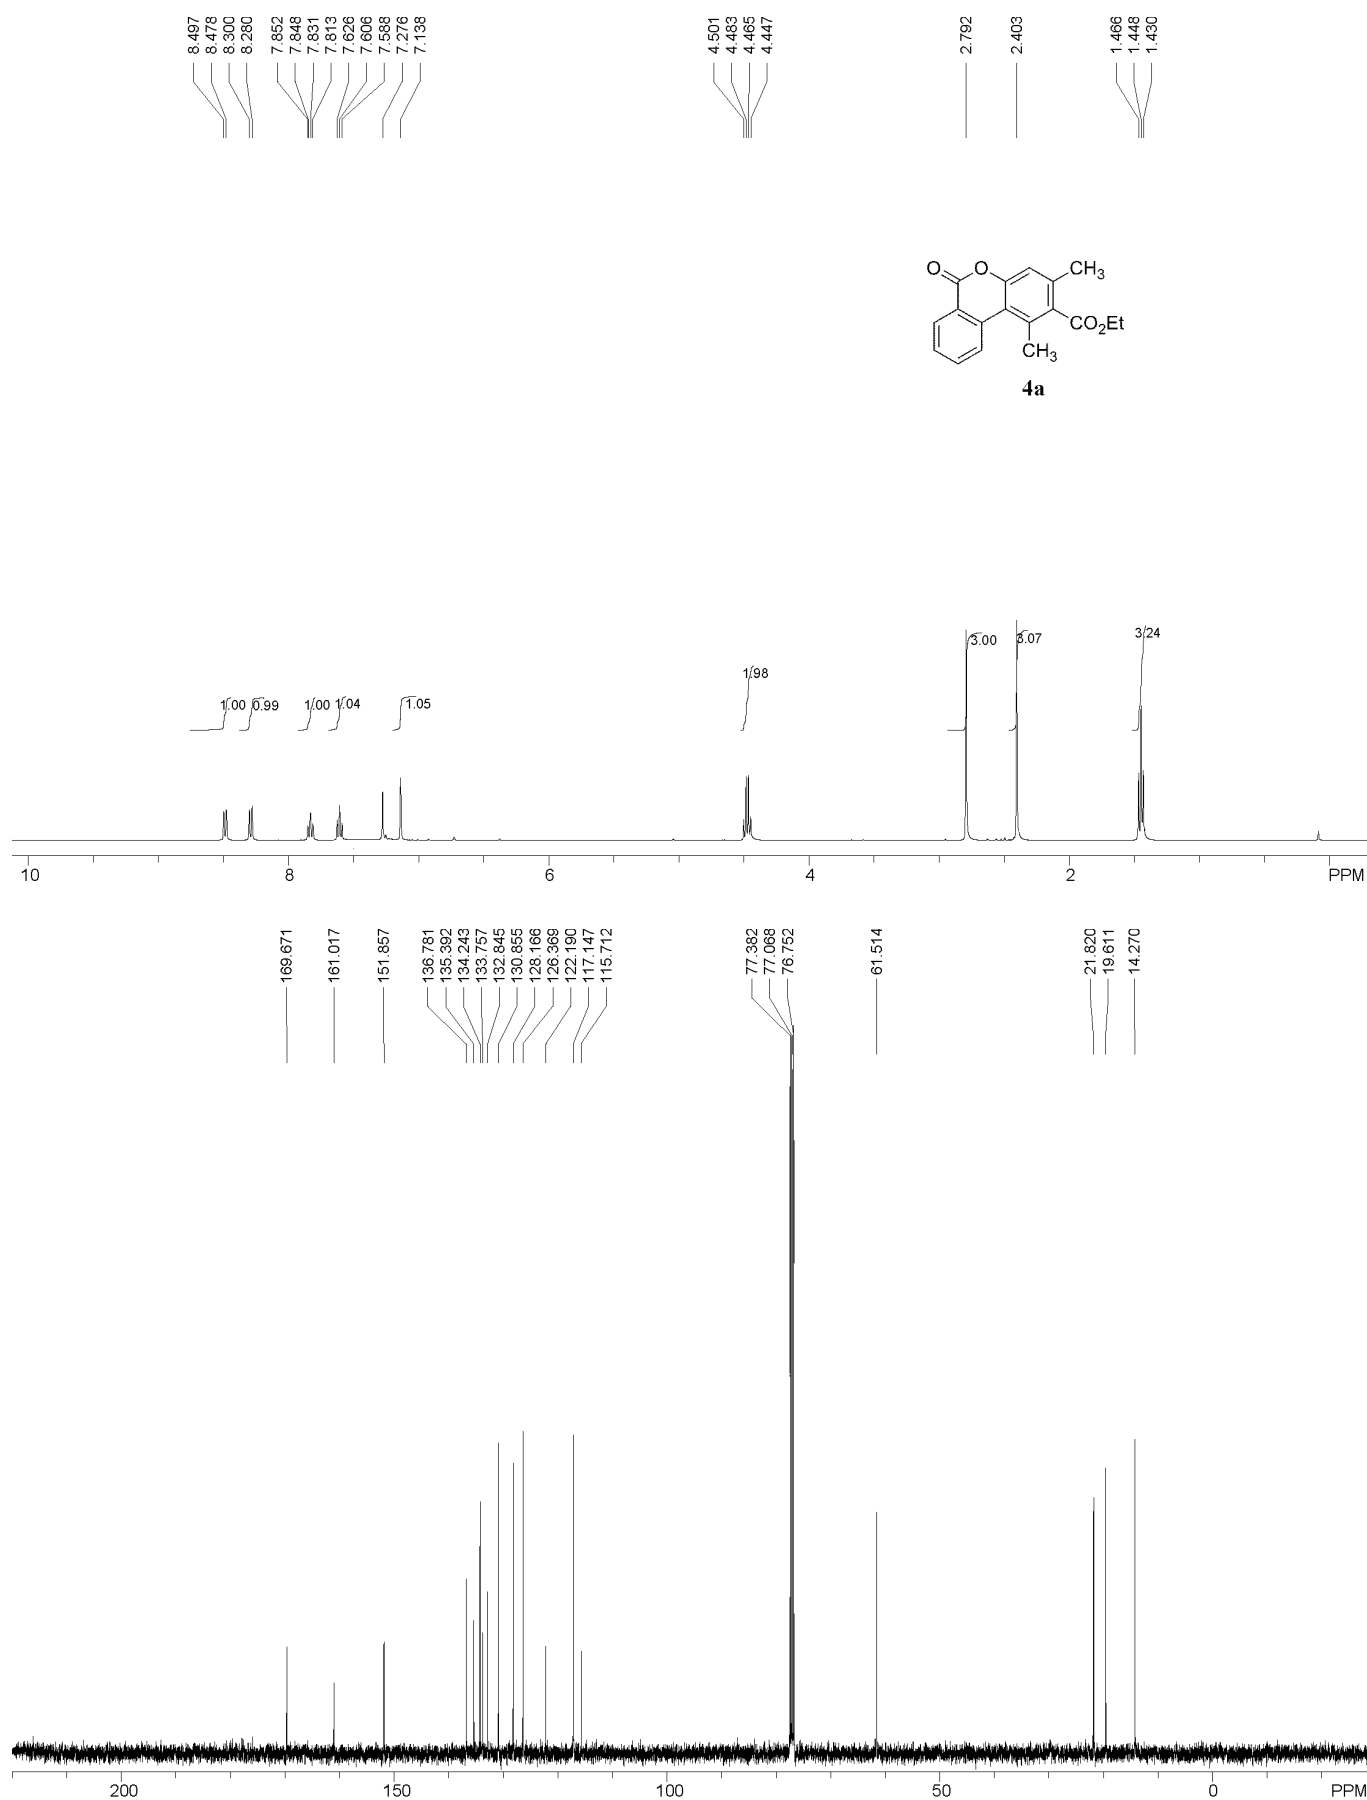

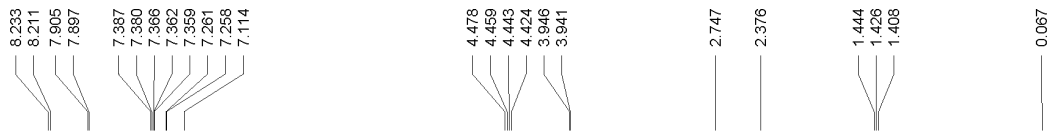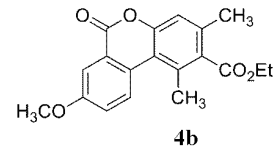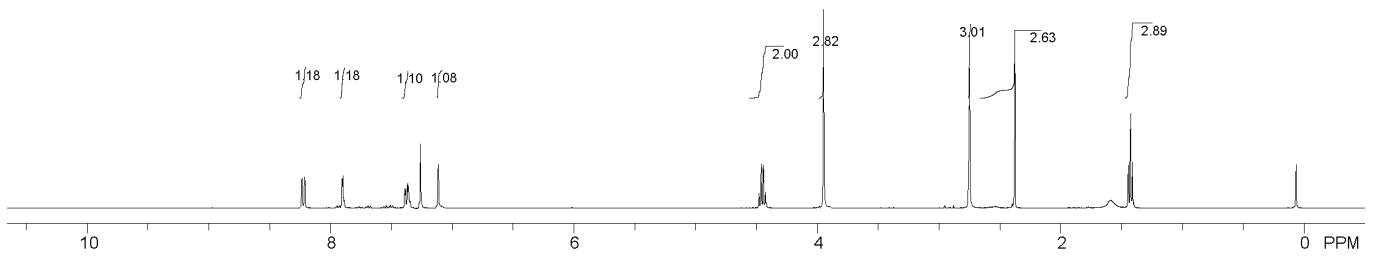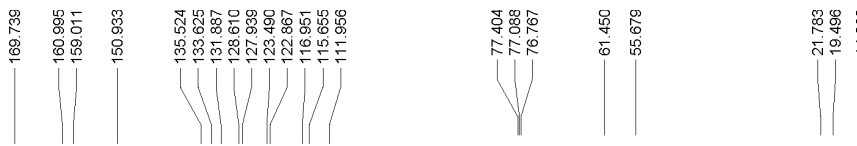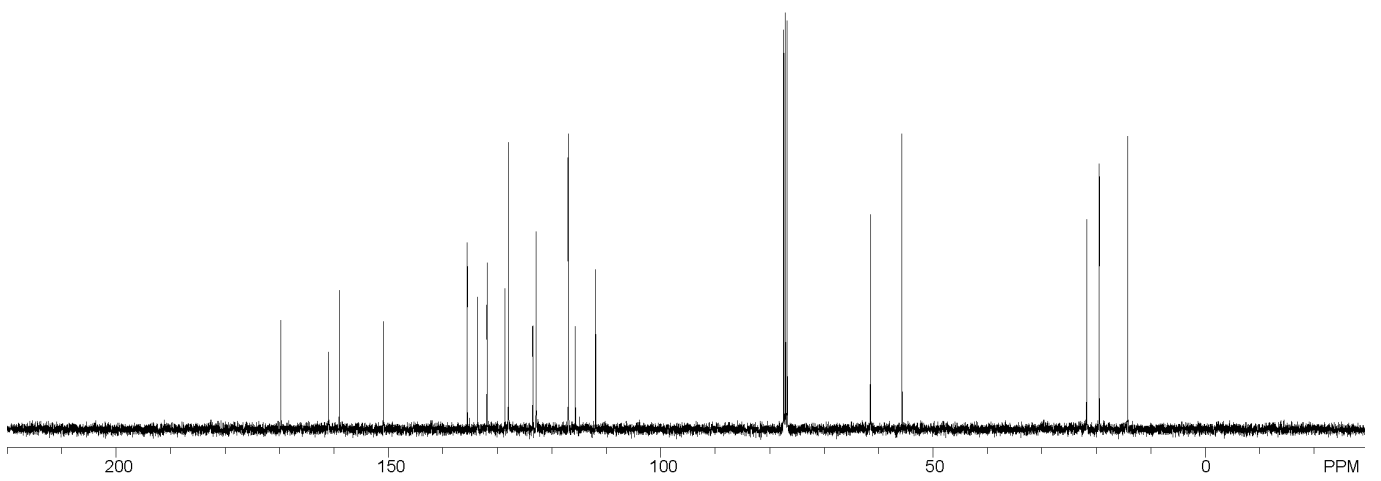

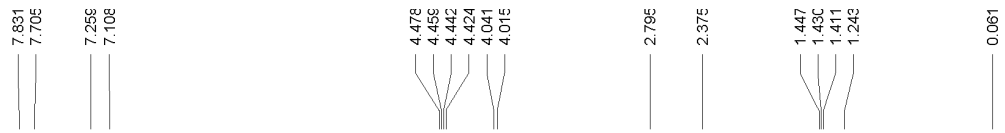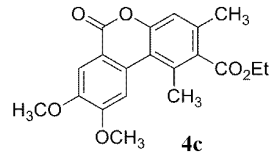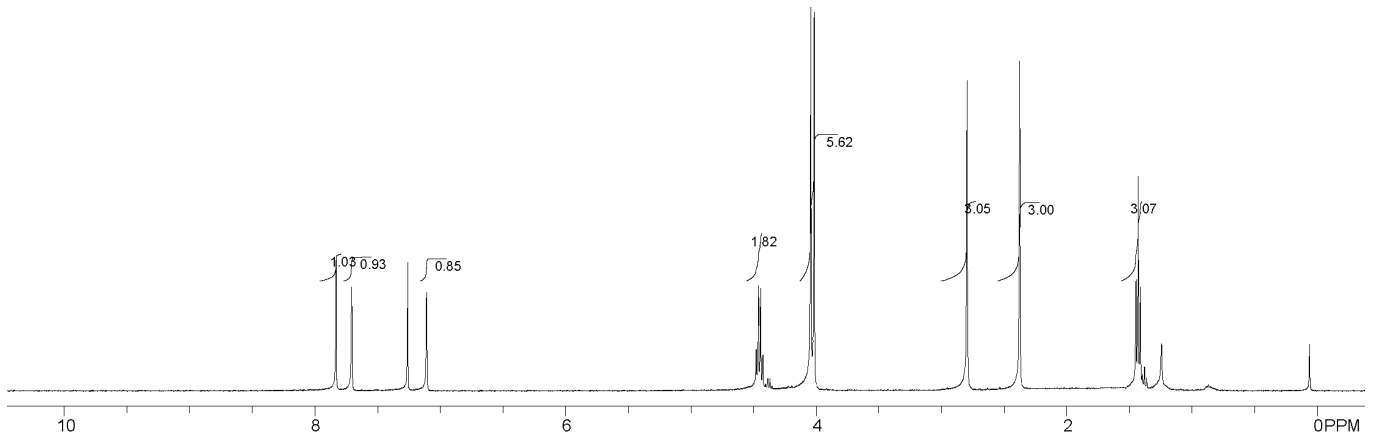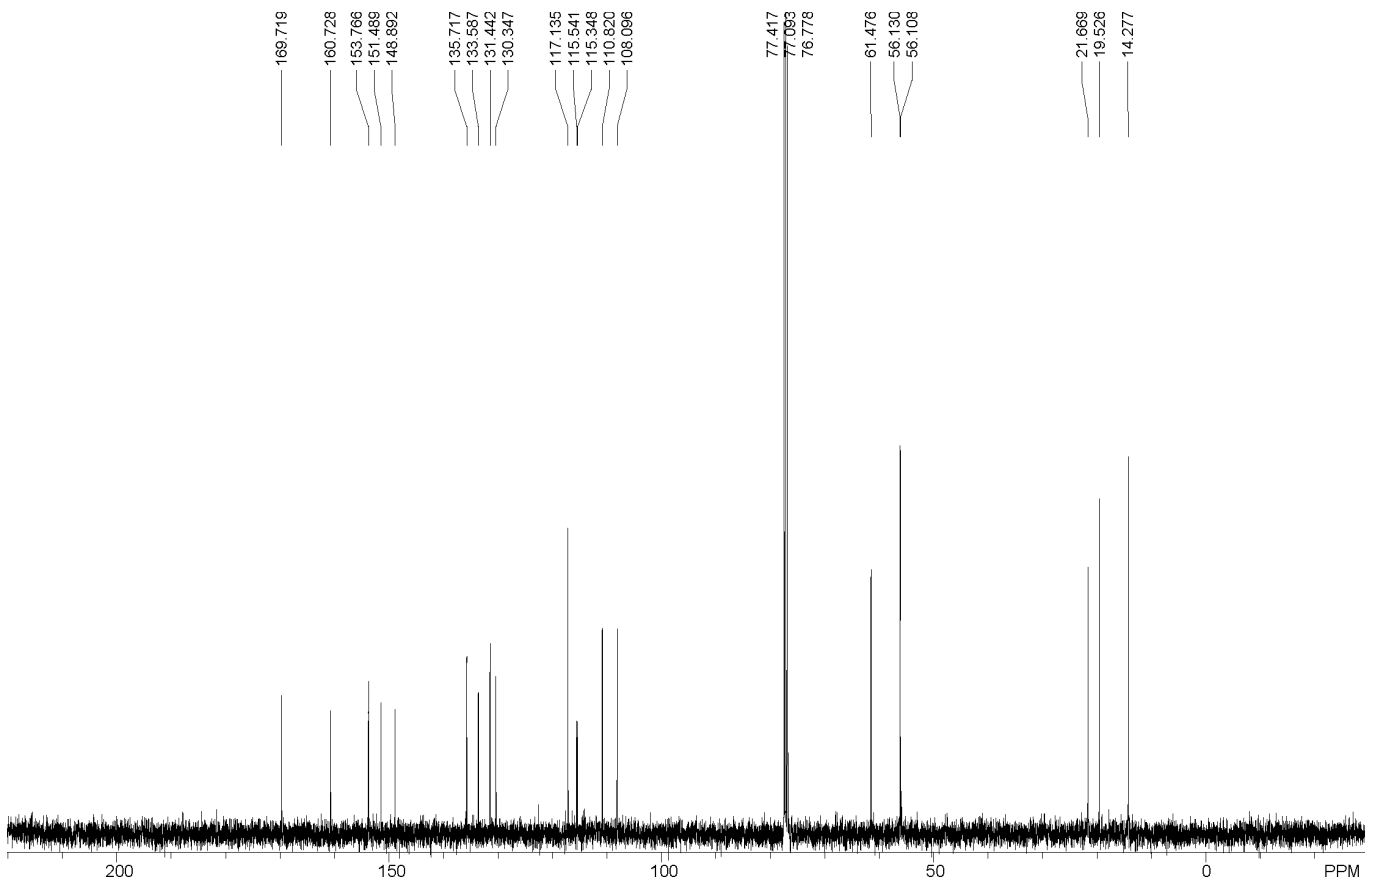

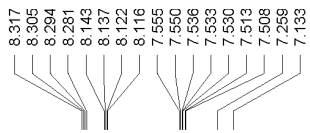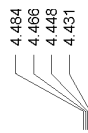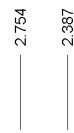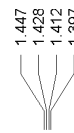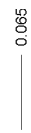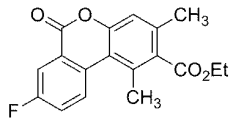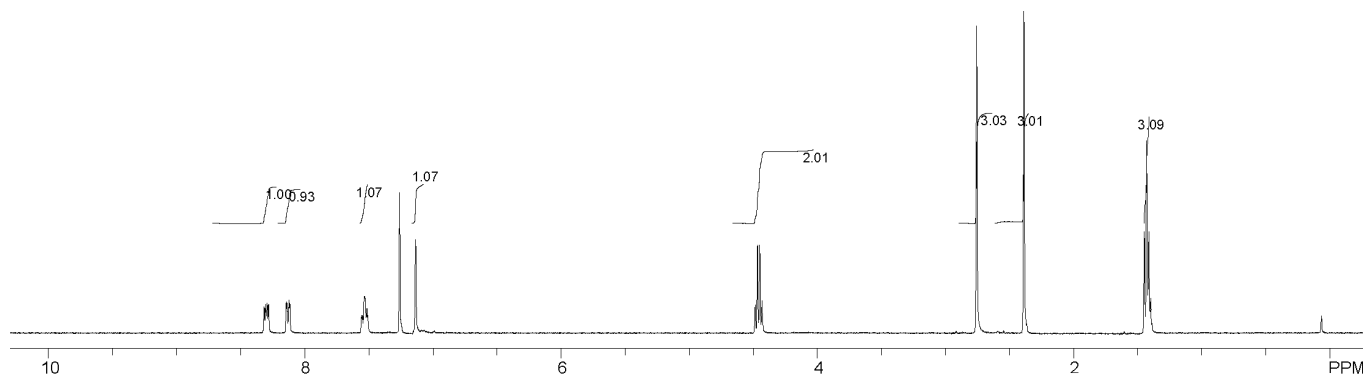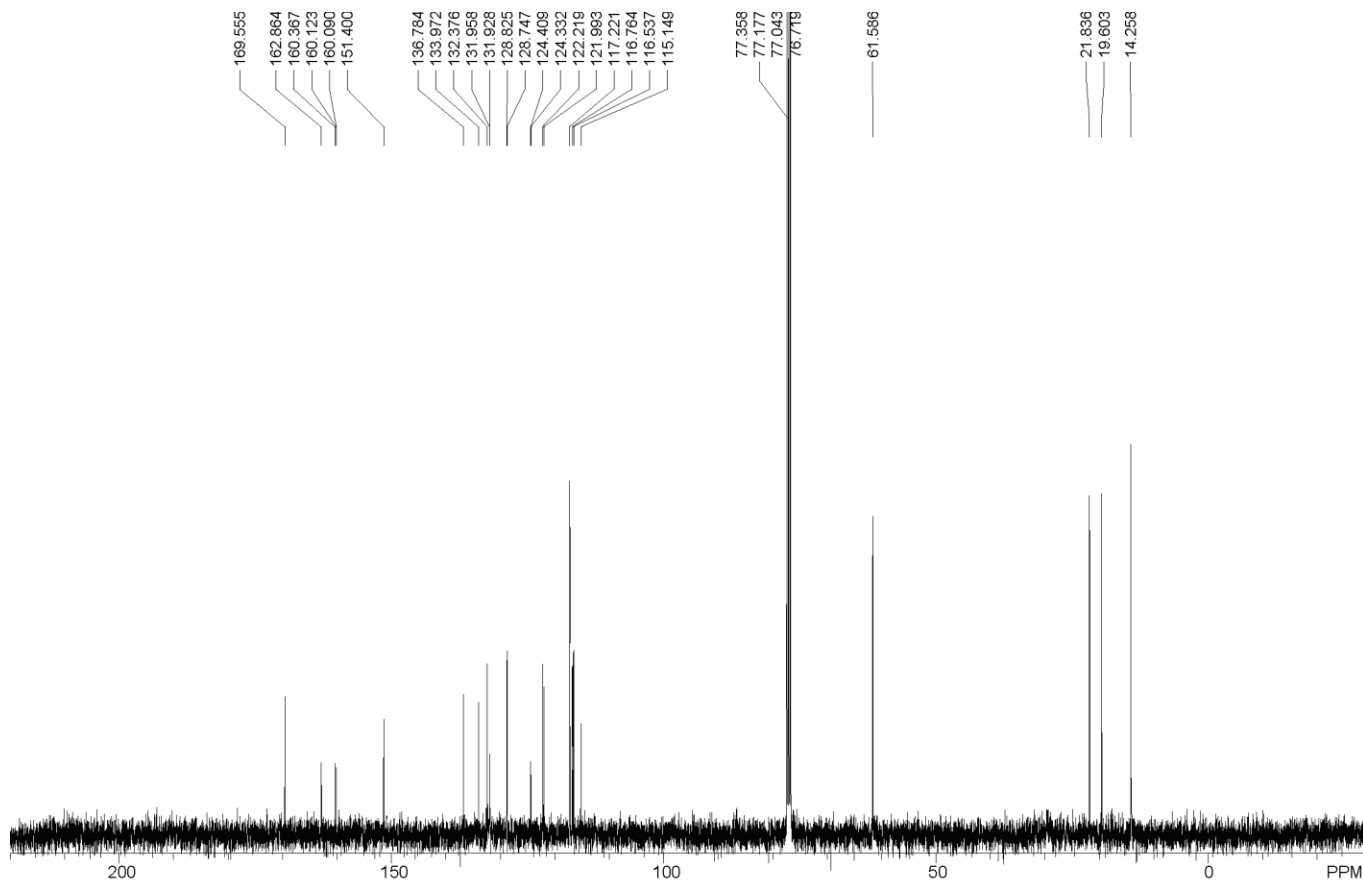

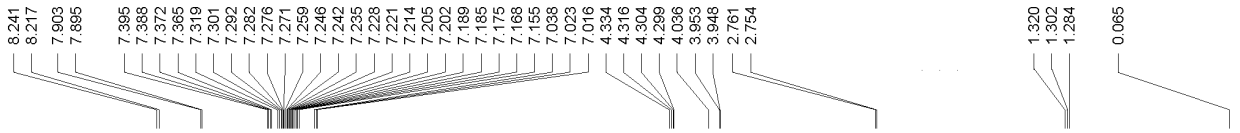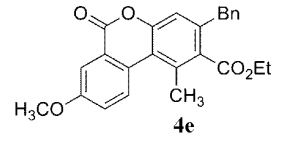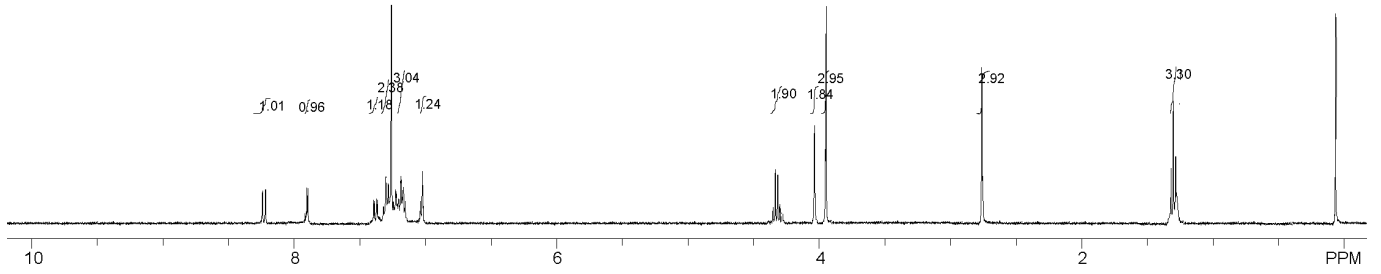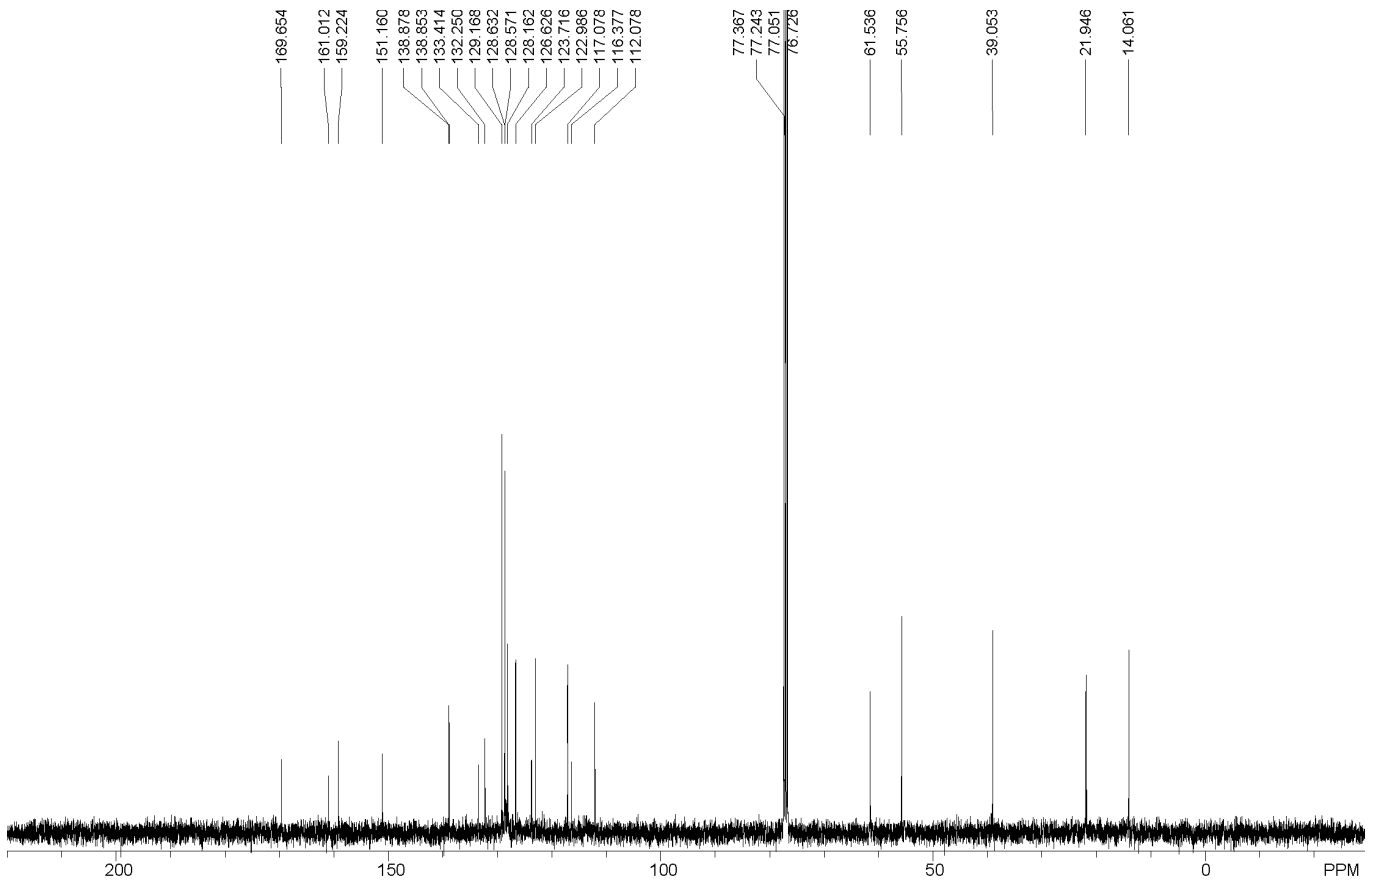

8.459  
8.440  
8.243  
8.222  
7.808  
7.788  
7.769  
7.587  
7.569  
7.550  
7.280

4.482  
4.464  
4.447  
4.427

2.722  
2.410  
2.309

1.445  
1.429  
1.410

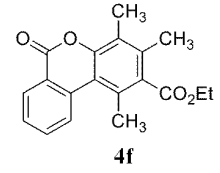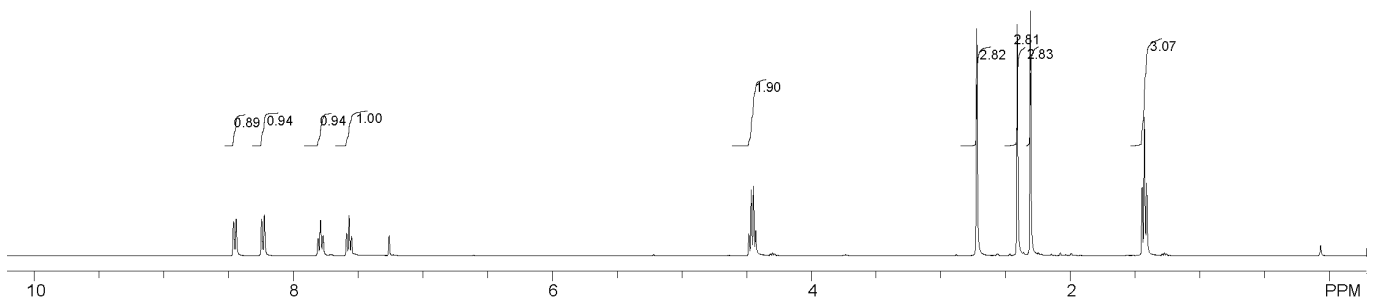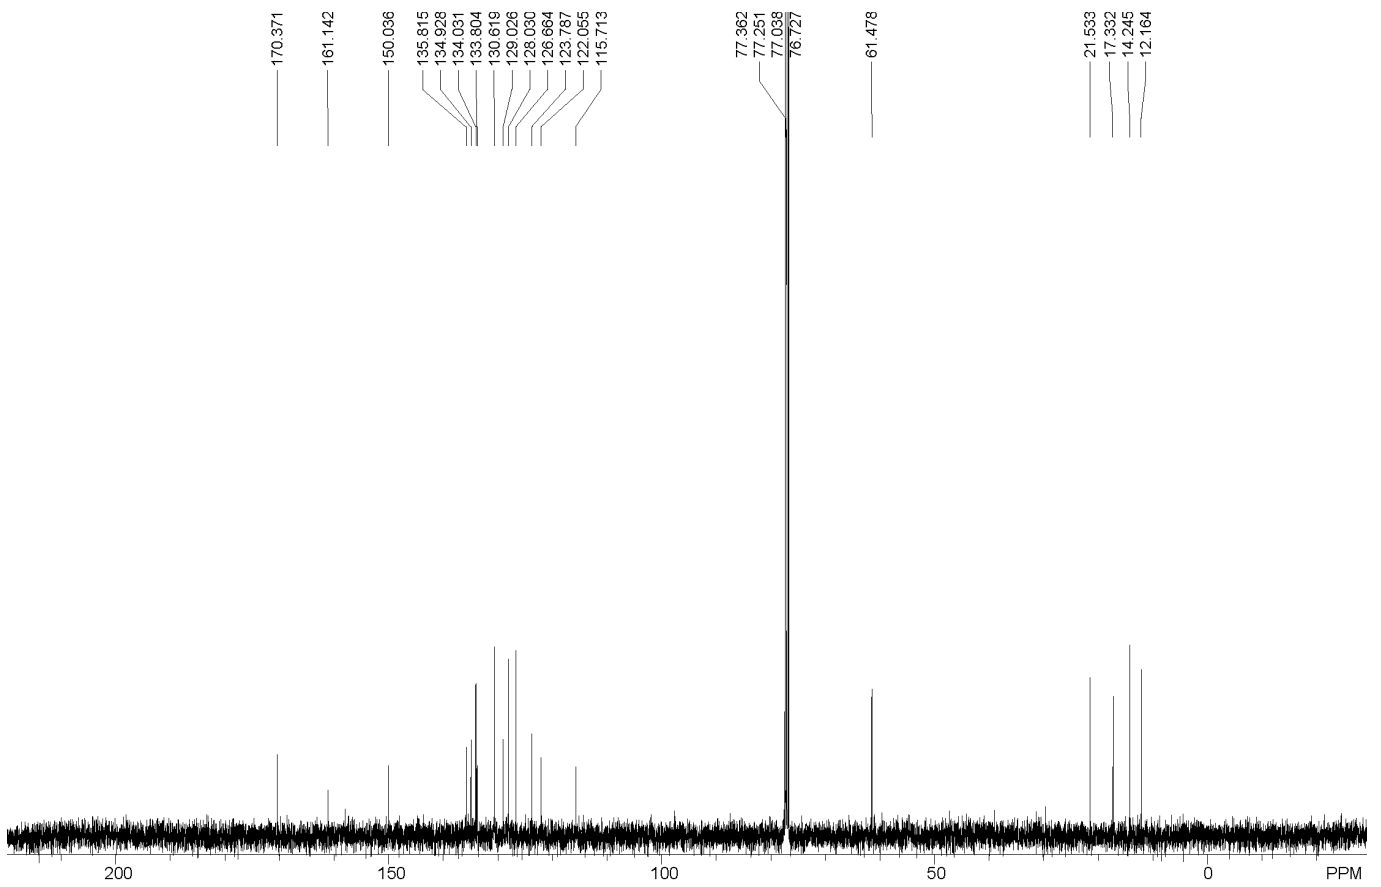

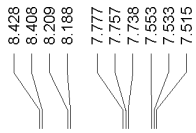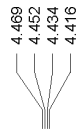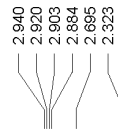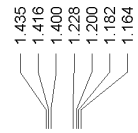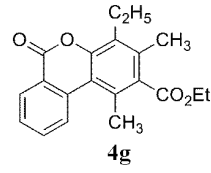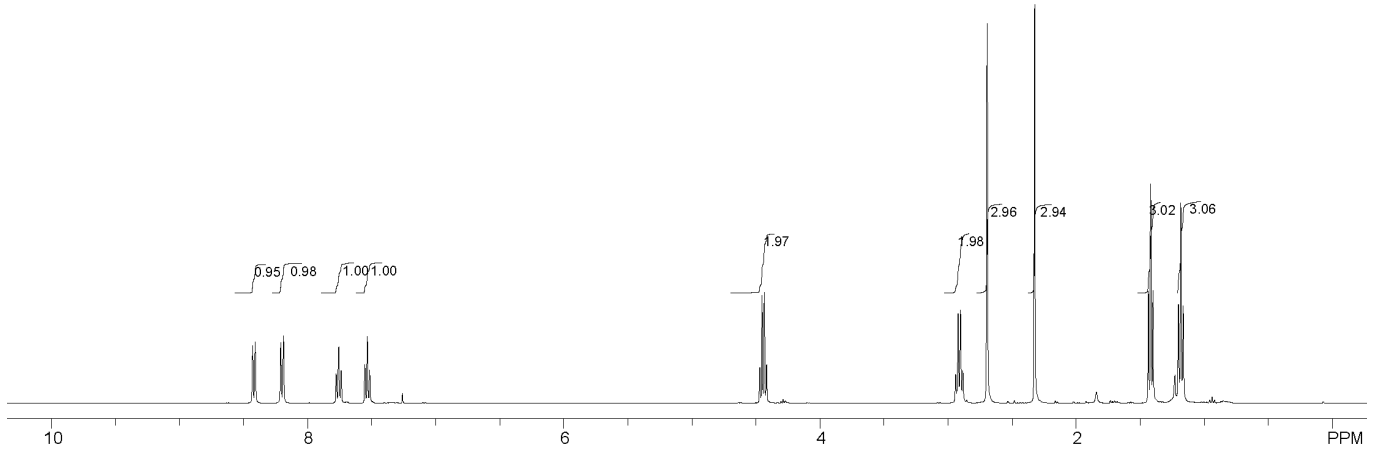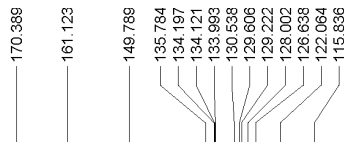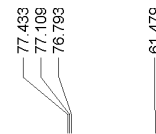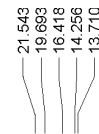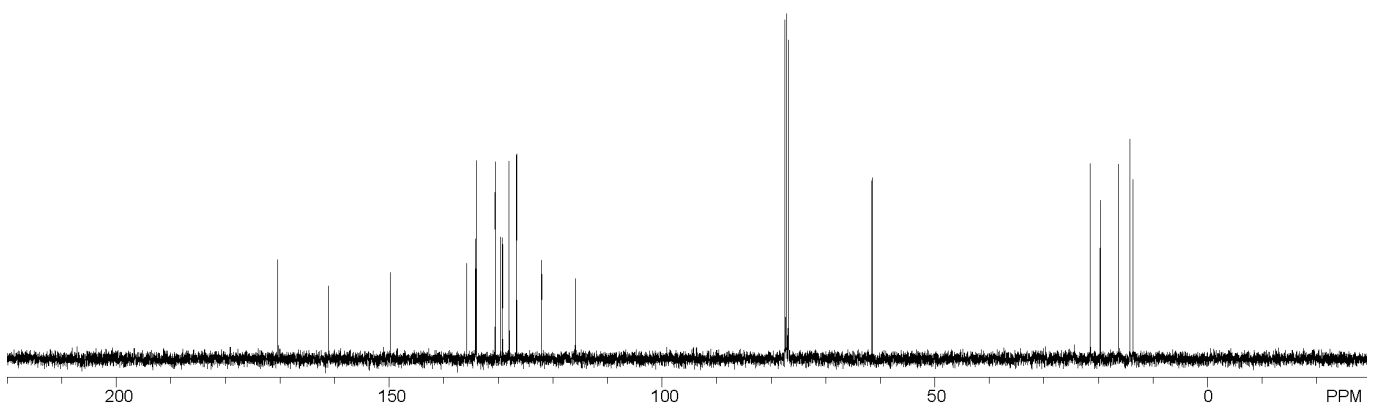



7.810  
7.796  
7.562  
7.548  
7.260  
7.228

3.358  
3.344  
3.328

2.743  
2.735  
2.727  
2.708  
2.317  
2.300  
2.284

0.066

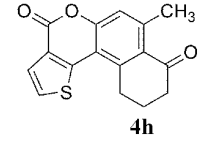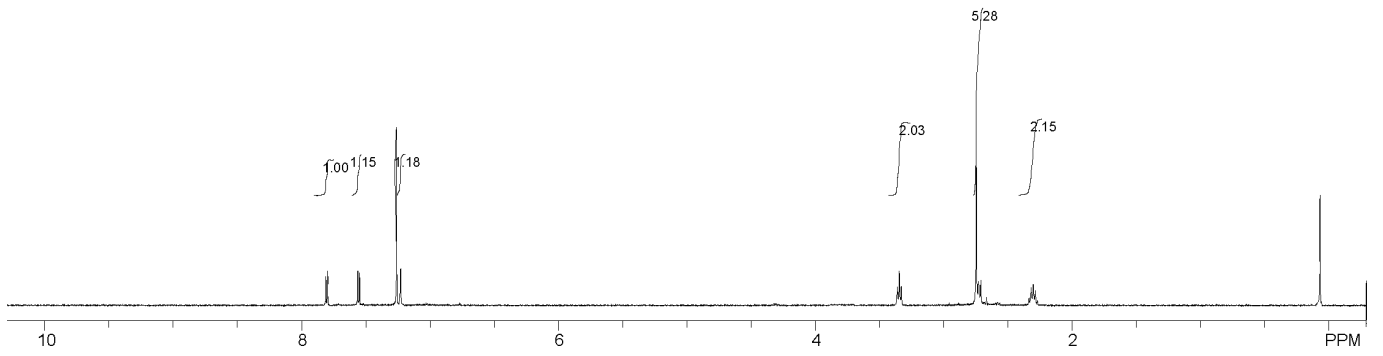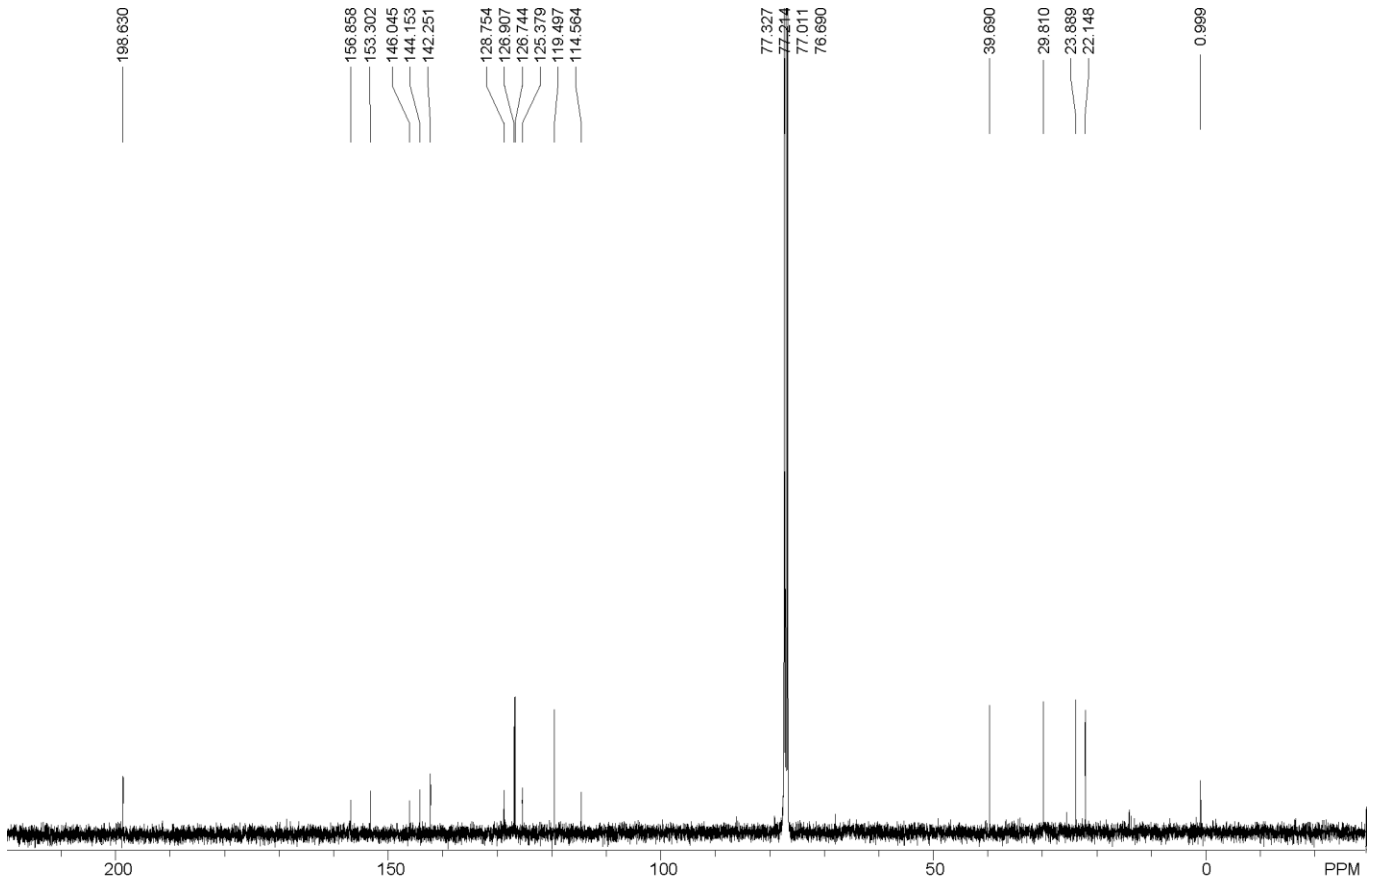

8.466  
8.448  
8.088  
8.068  
7.790  
7.784  
7.772  
7.753  
7.751  
7.607  
7.604  
7.598  
7.587  
7.587  
7.421  
7.404  
7.394  
7.387  
7.359  
7.321  
7.307  
7.256  
7.199

3.762  
3.759  
3.724  
3.720  
3.584  
3.557  
3.555  
3.544  
3.519  
3.516  
3.280  
3.274  
3.268  
3.262  
3.254  
3.016  
2.986  
2.760

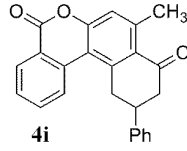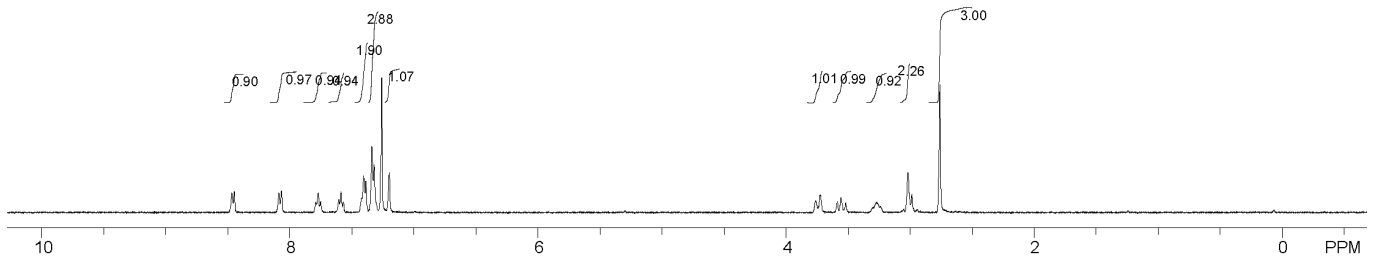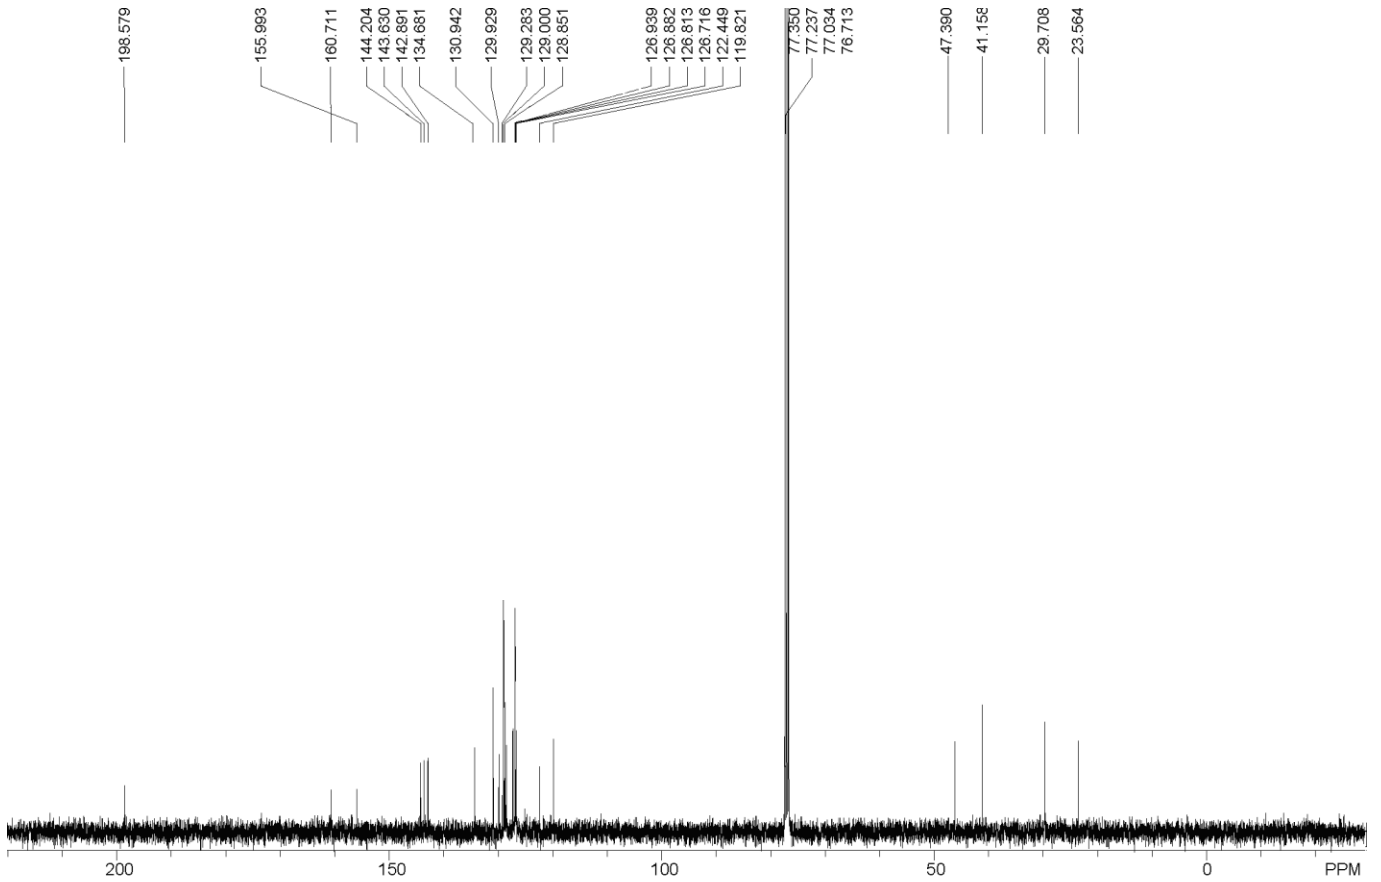

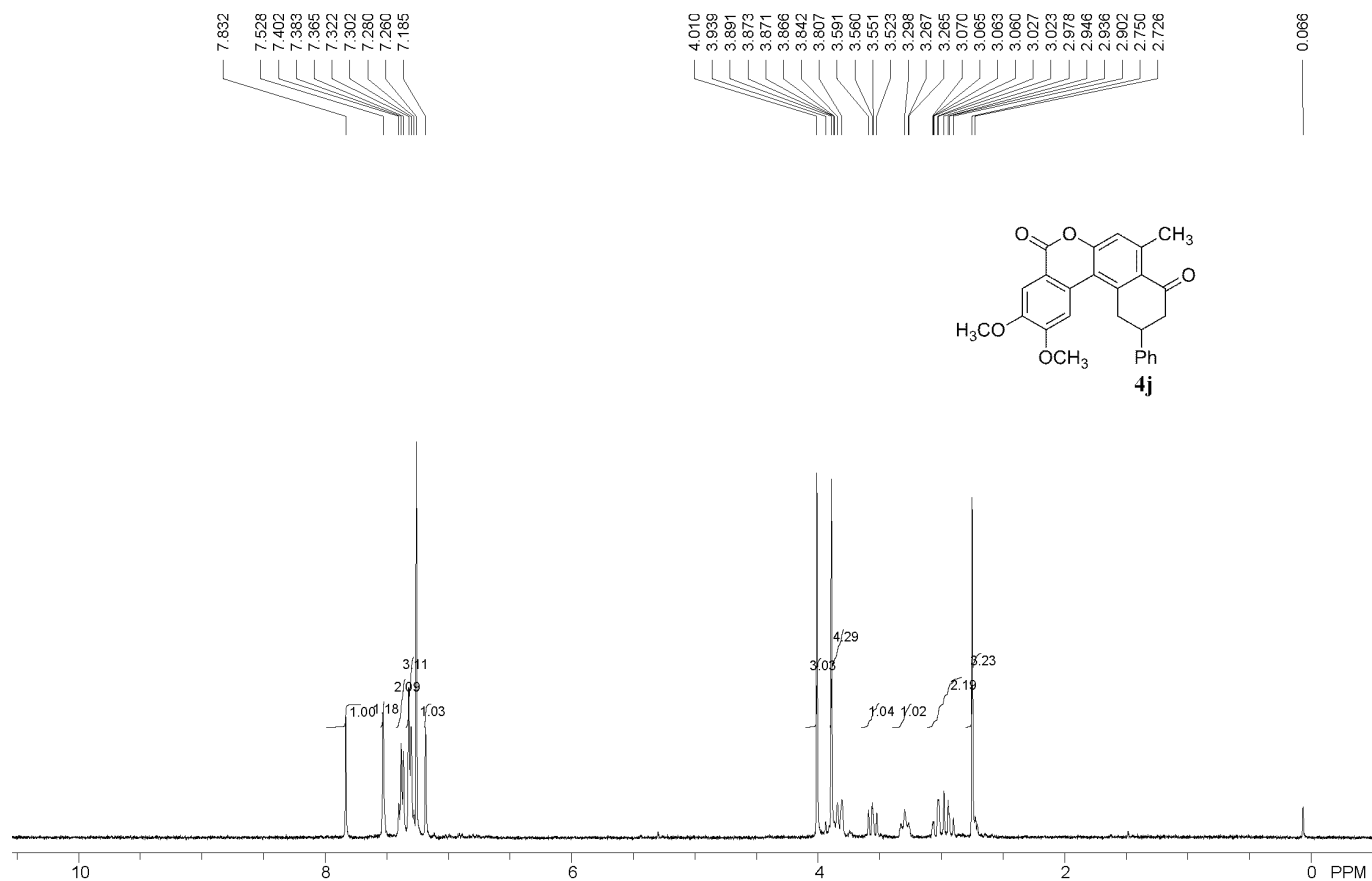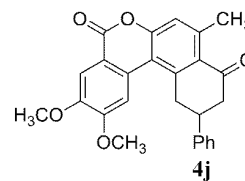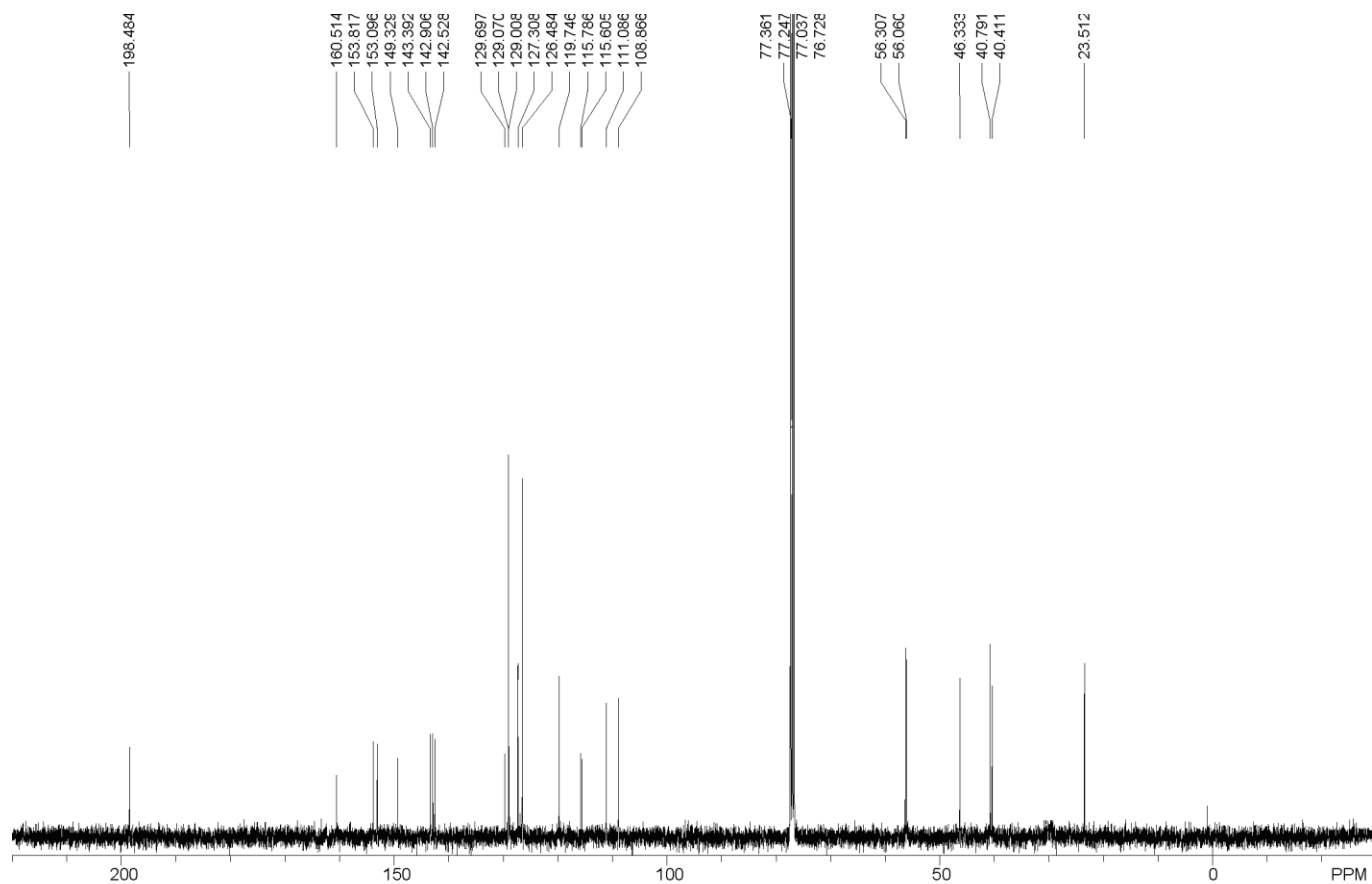

8.397  
8.377  
8.002  
7.982  
7.745  
7.727  
7.708  
7.561  
7.541  
7.522  
7.405  
7.385  
7.367  
7.320  
7.303  
7.282  
7.258

3.649  
3.611  
3.479  
3.448  
3.411  
3.236  
3.205  
3.046  
3.013  
3.000  
2.984  
2.850  
2.838  
2.806  
2.841  
2.440  
1.250

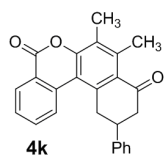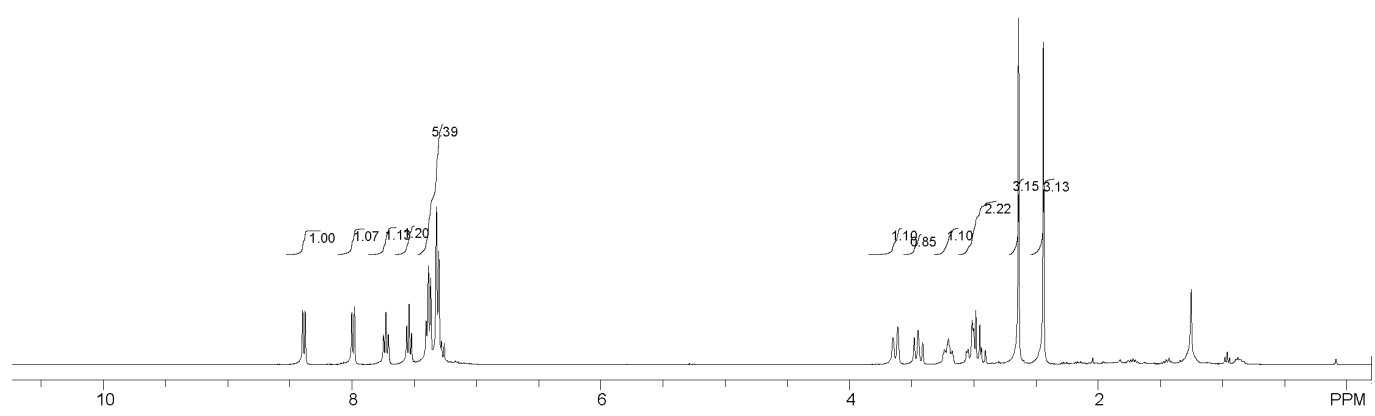

199.735  
160.720  
151.601  
142.975  
141.924  
139.807  
134.951  
134.111  
130.538  
130.260  
128.946  
128.280  
127.213  
127.152  
126.931  
125.431  
122.178  
114.981  
77.403  
77.093  
76.776  
46.497  
41.328  
39.955  
18.128  
12.300

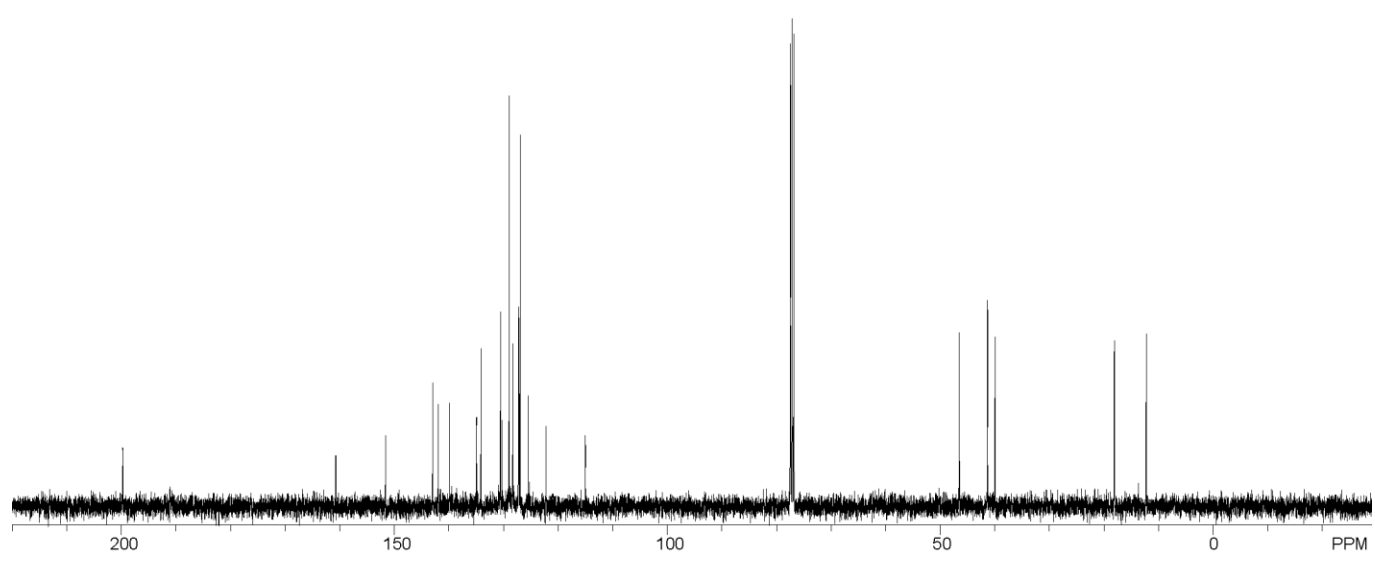

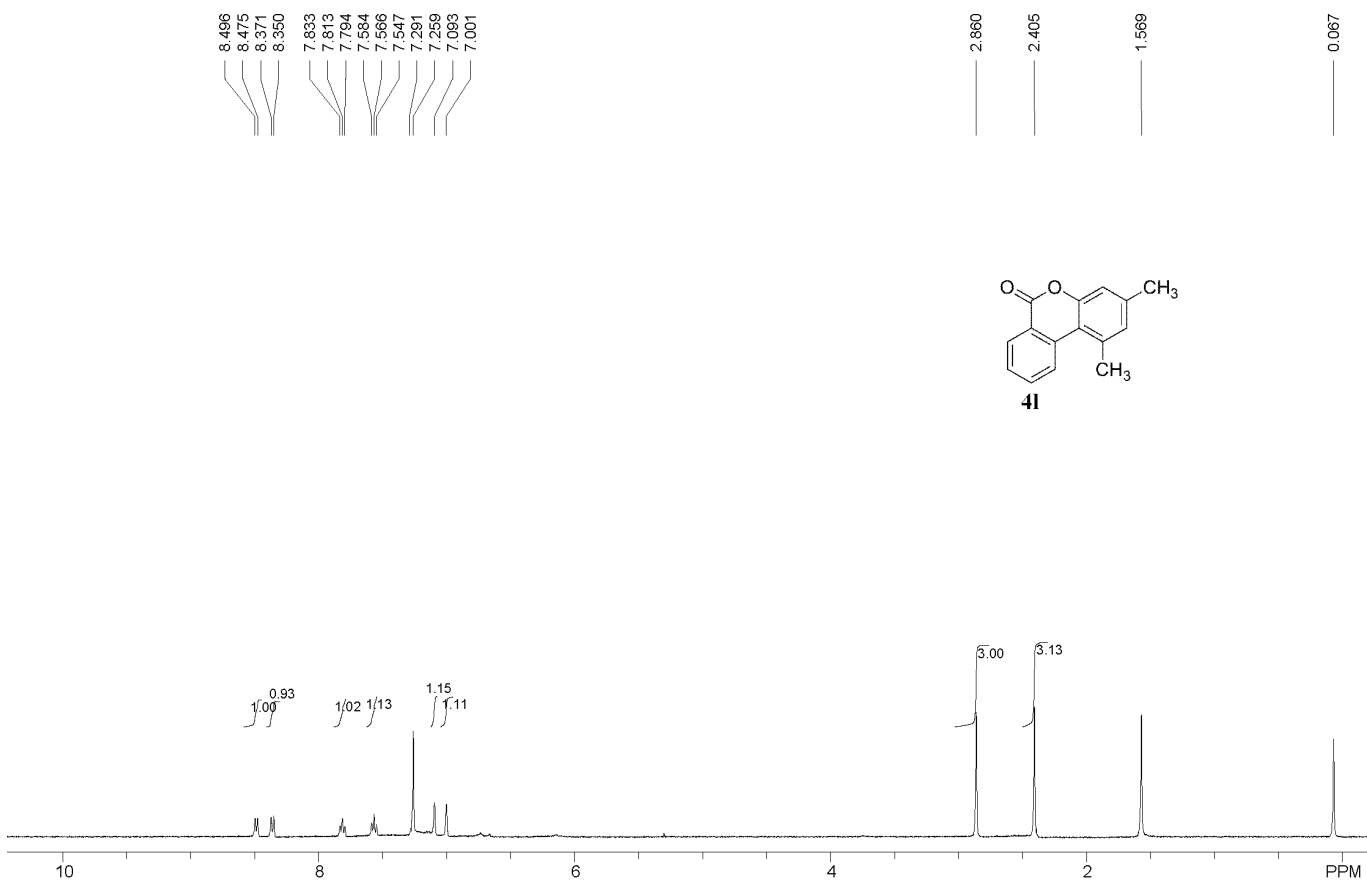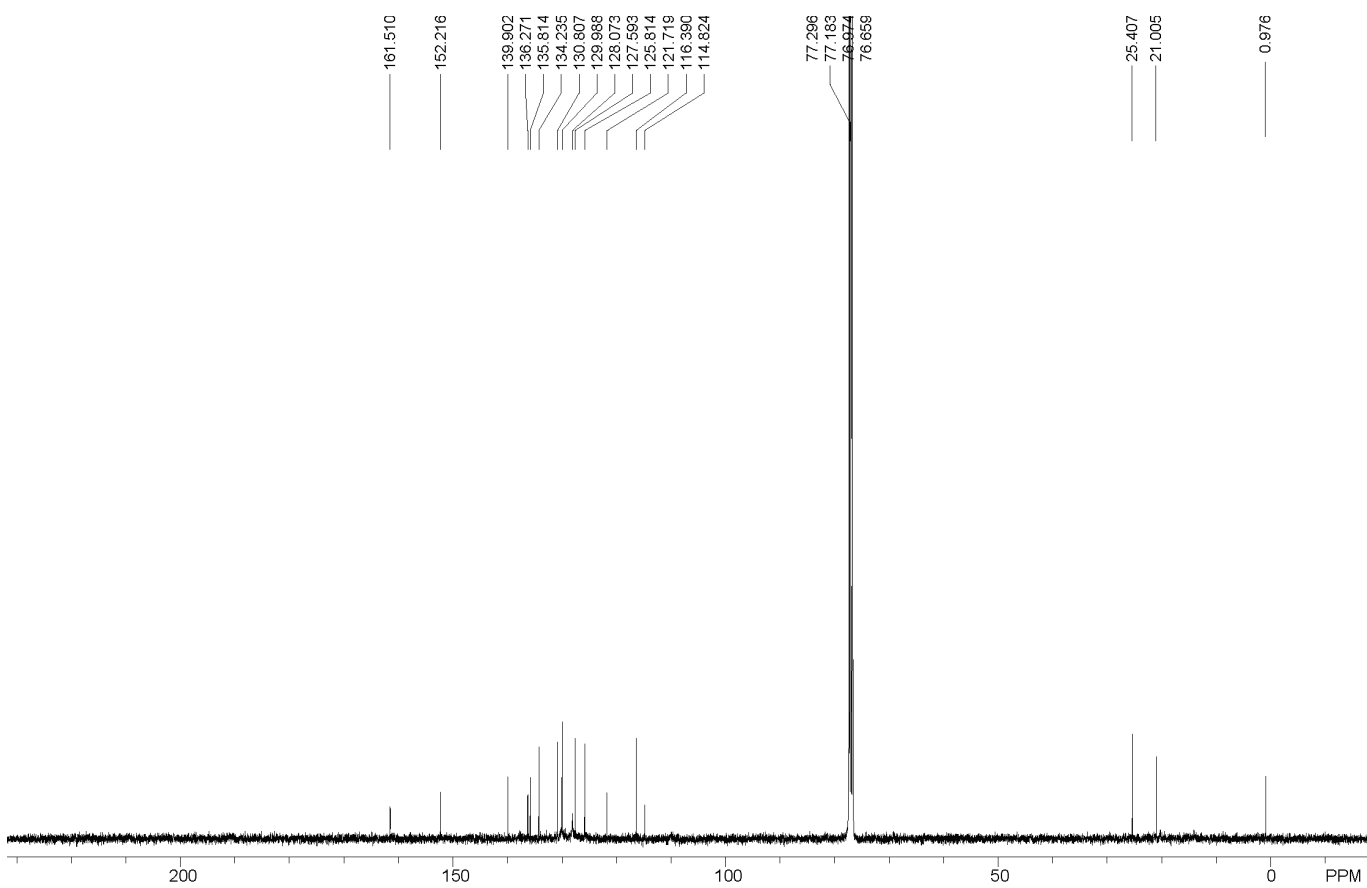

8.289  
8.253  
8.232

7.626  
7.604

7.259  
7.076  
6.979

2.835  
2.496  
2.413

0.072  
0.070

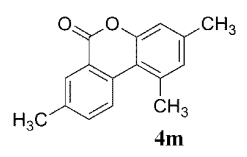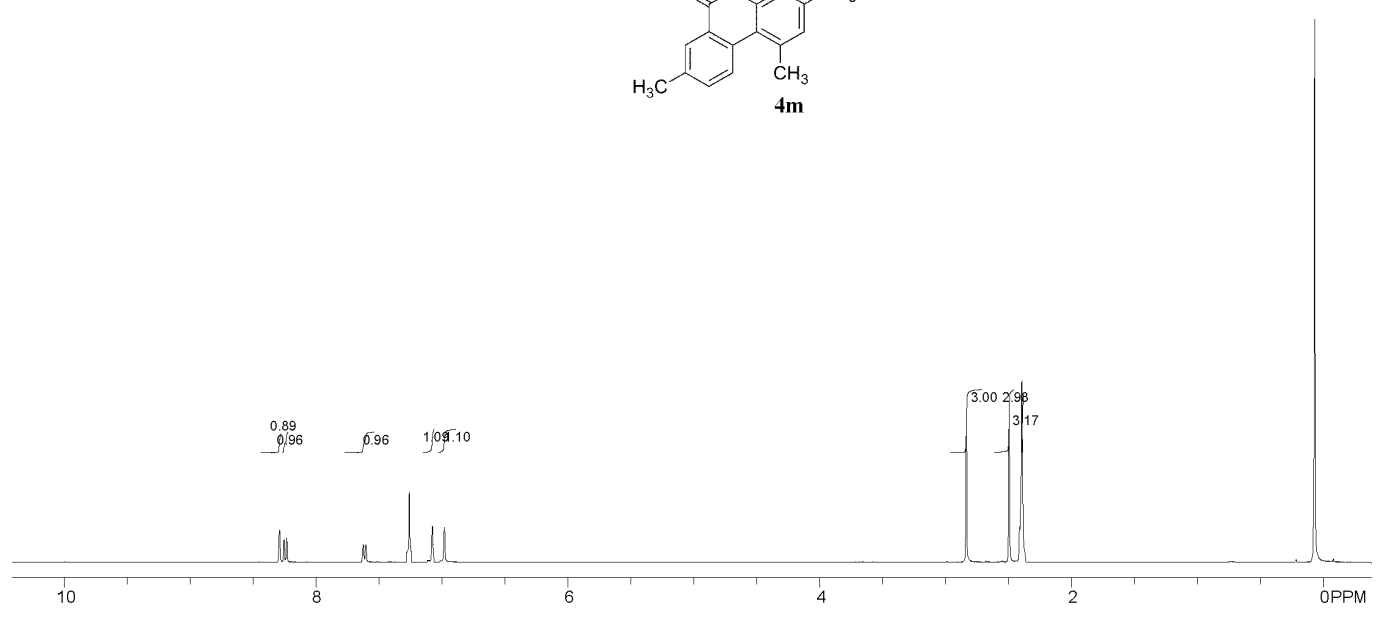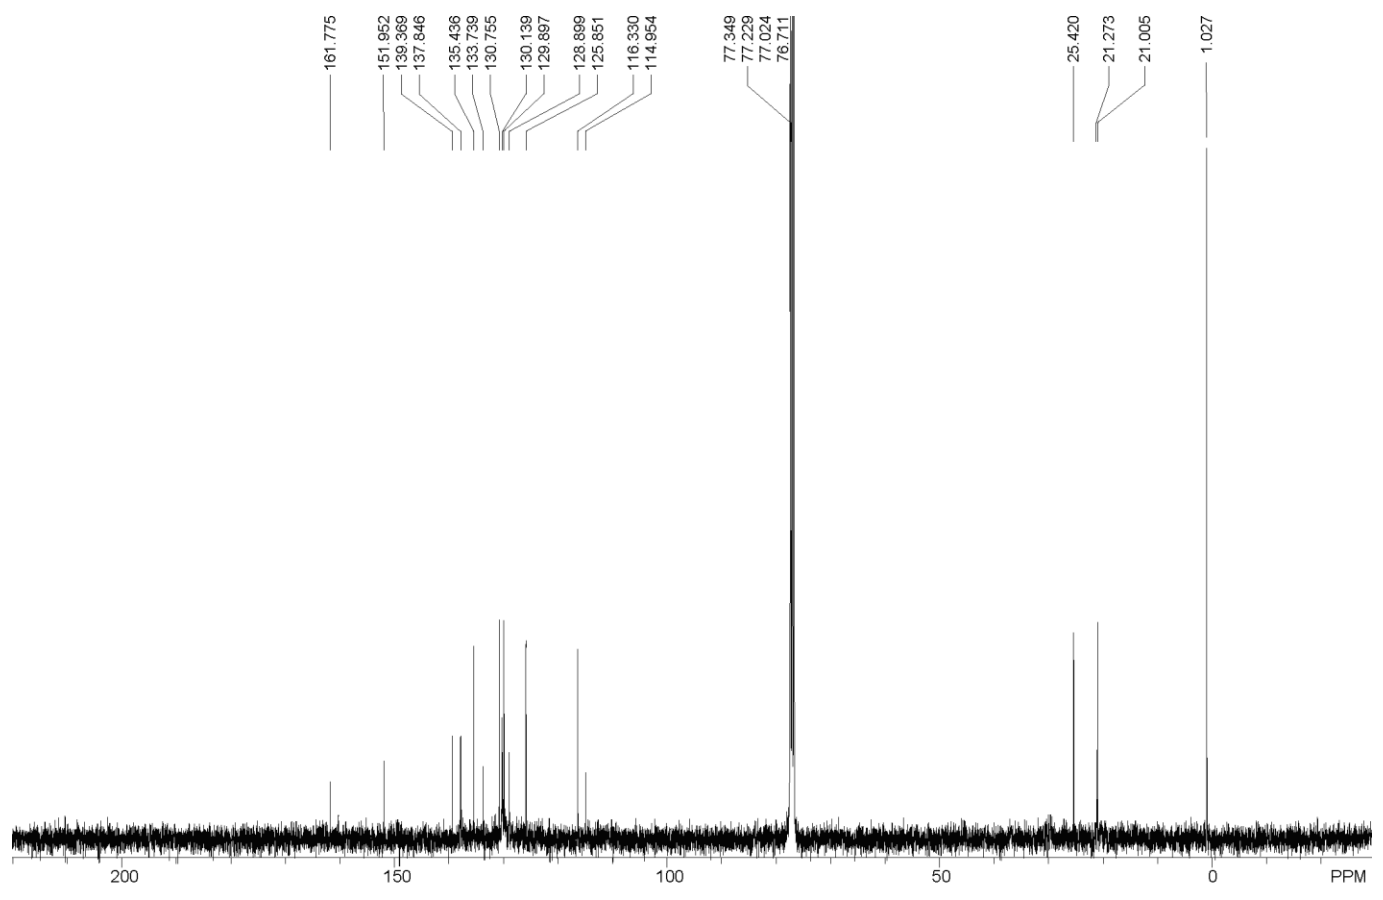

8.312  
8.288  
7.920  
7.915  
7.393  
7.387  
7.369  
7.364  
7.259  
7.054  
6.982

3.948  
2.829  
2.394

0.067

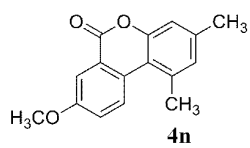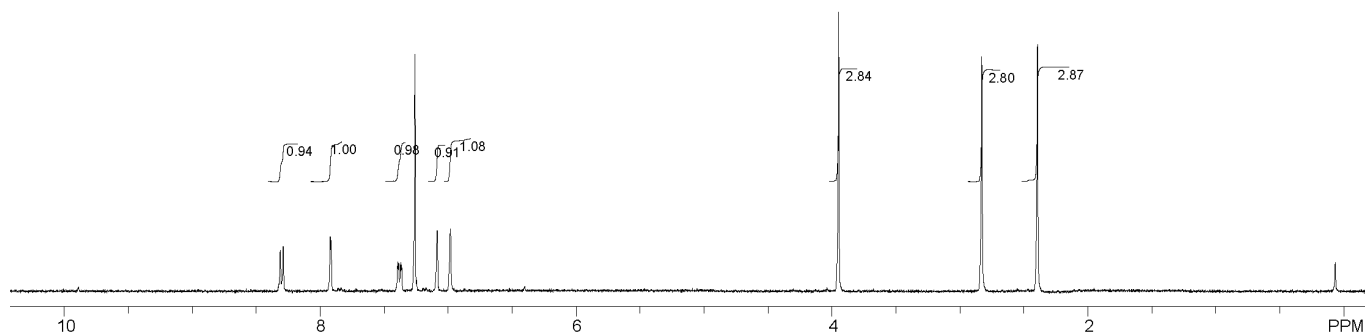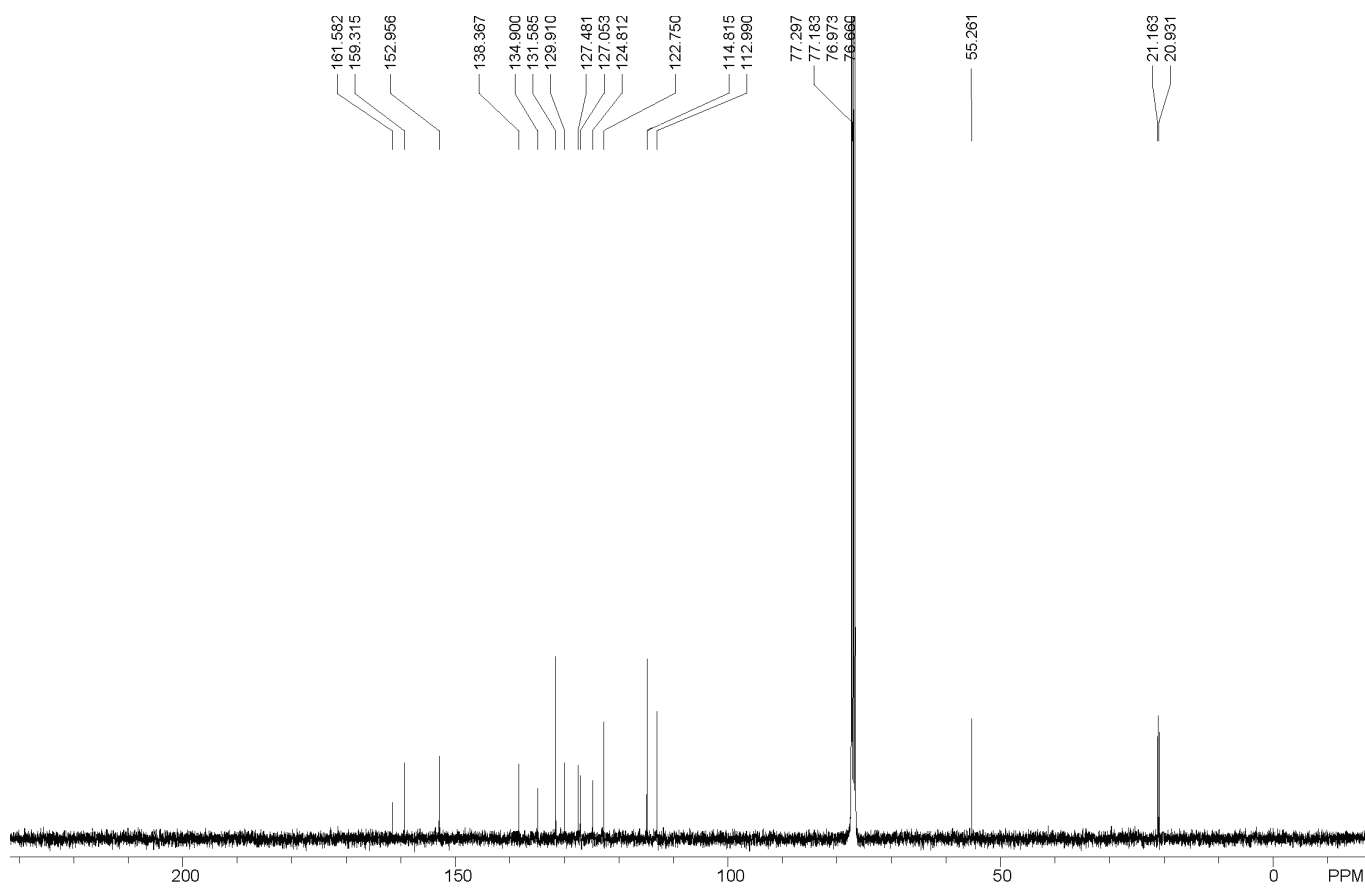

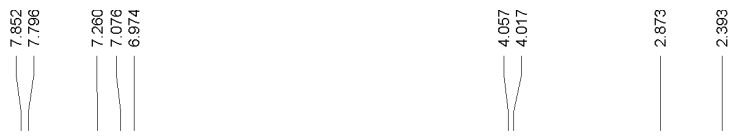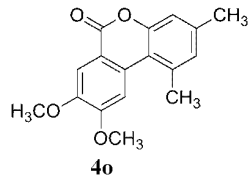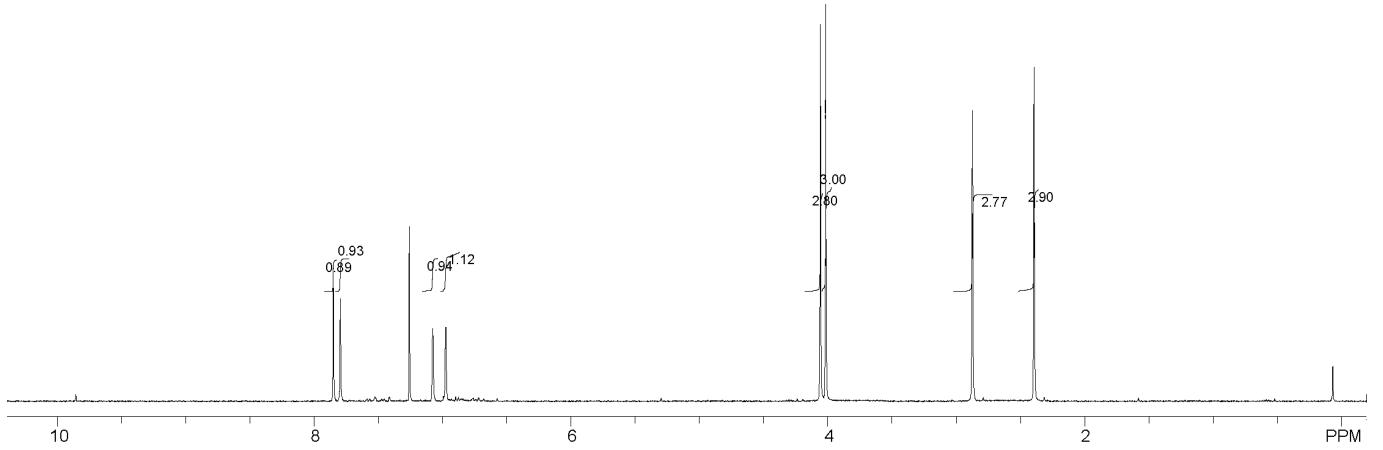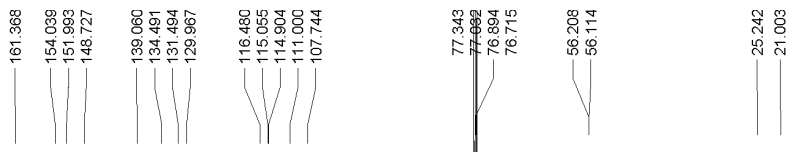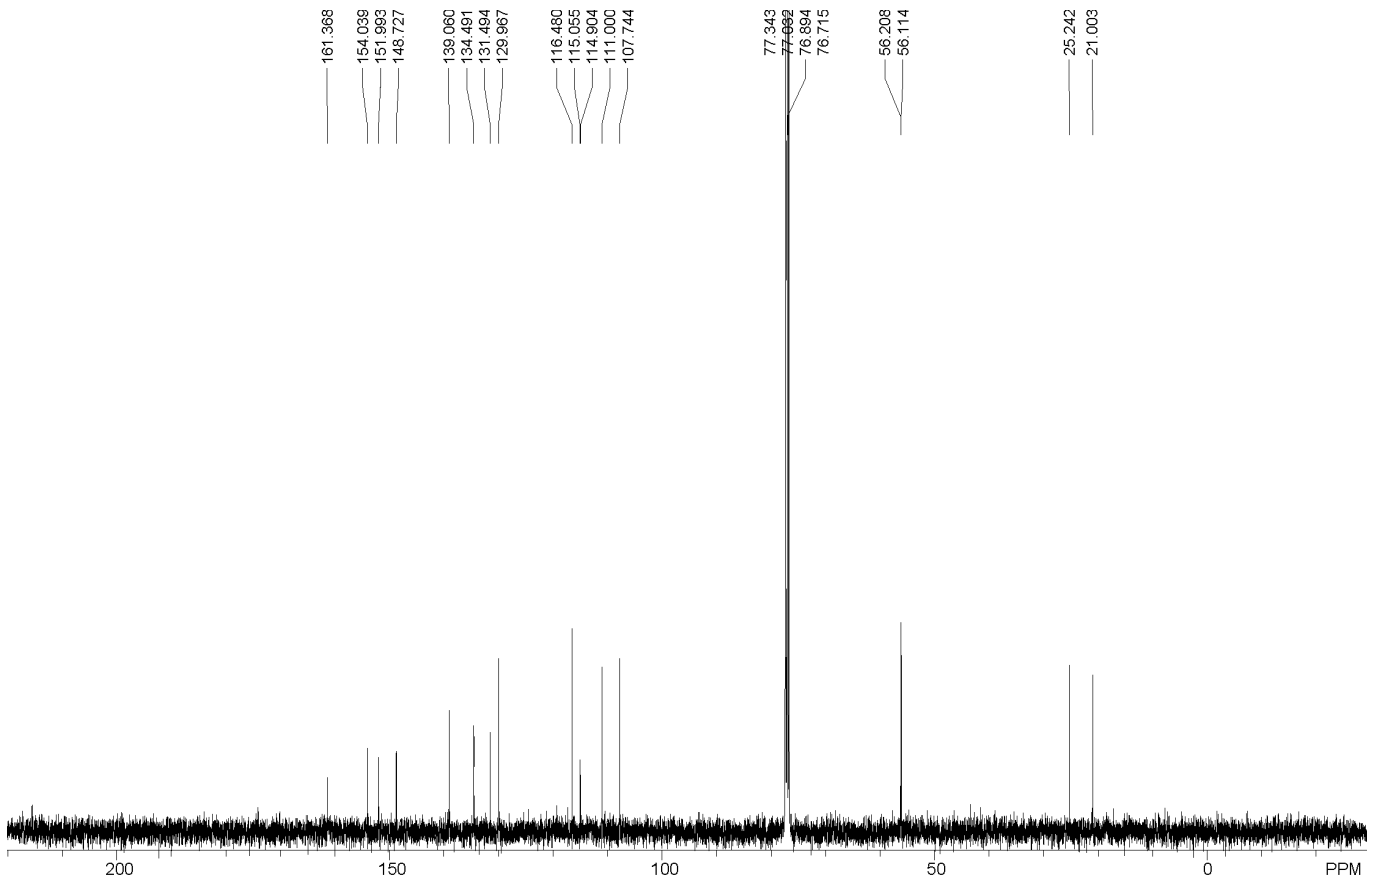



8.479  
8.459  
8.269  
8.248  
7.809  
7.791  
7.773  
7.593  
7.572  
7.554  
7.260

3.061  
3.043  
3.025  
3.003

2.595  
2.426

1.234  
1.215  
1.197

0.070

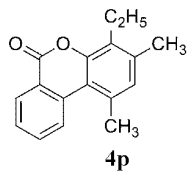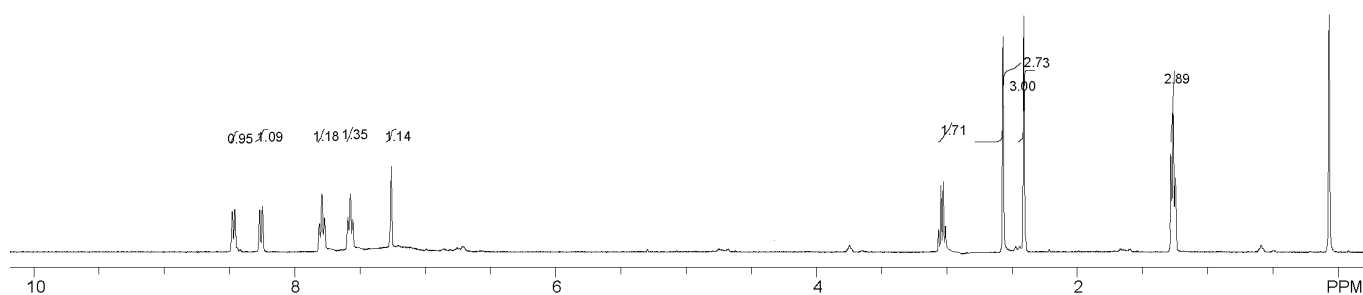

161.366  
147.480  
145.237  
136.115  
133.943  
130.828  
130.561  
130.248  
127.977  
126.575  
124.931  
122.088  
116.353

77.374  
77.260  
77.059  
76.734

21.186  
20.570  
20.192  
16.880

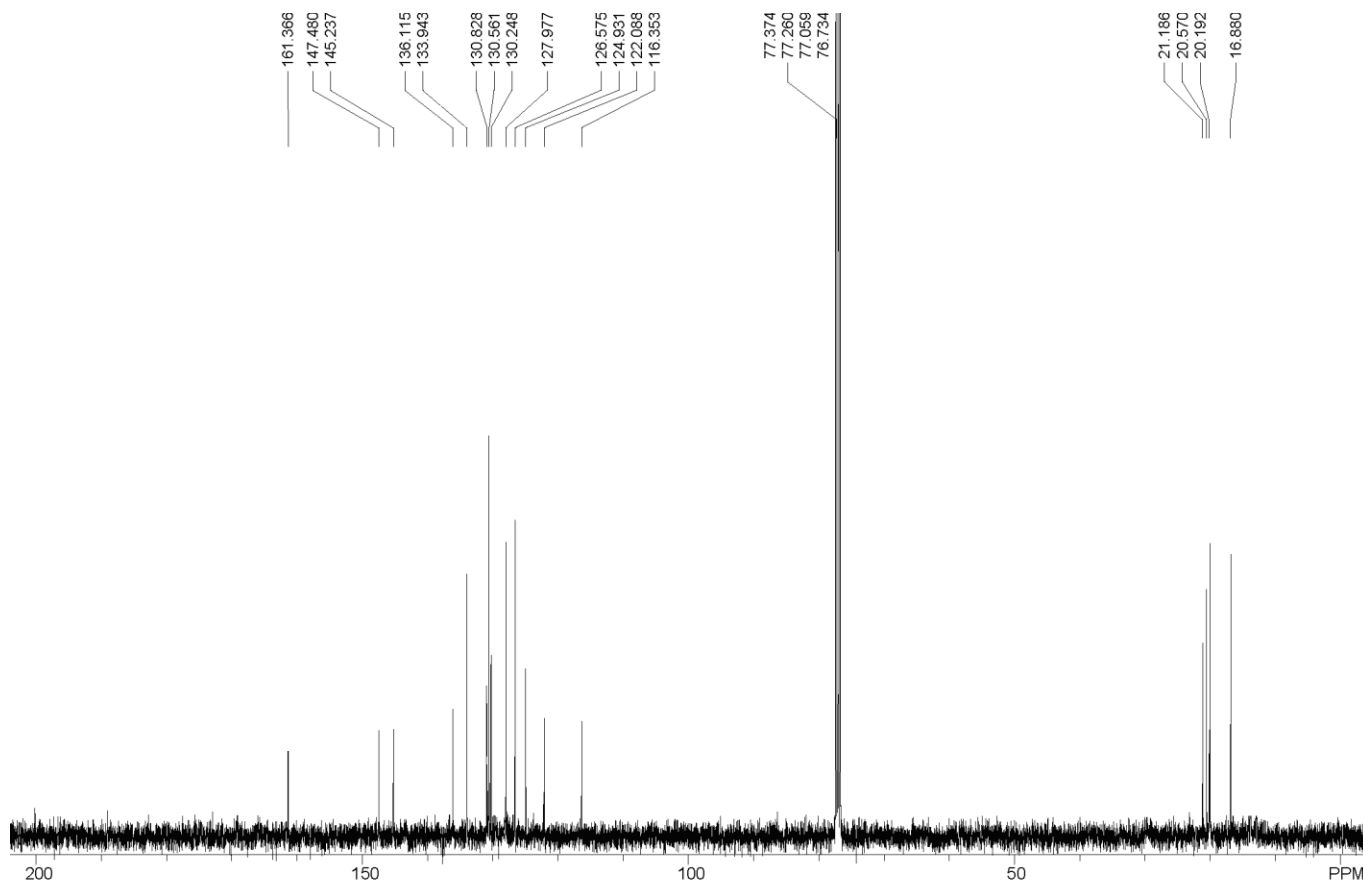

8.479  
8.458  
8.308  
8.287  
7.891  
7.872  
7.852  
7.866  
7.646  
7.628  
7.258  
7.190

3.084  
2.621

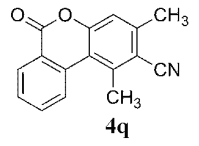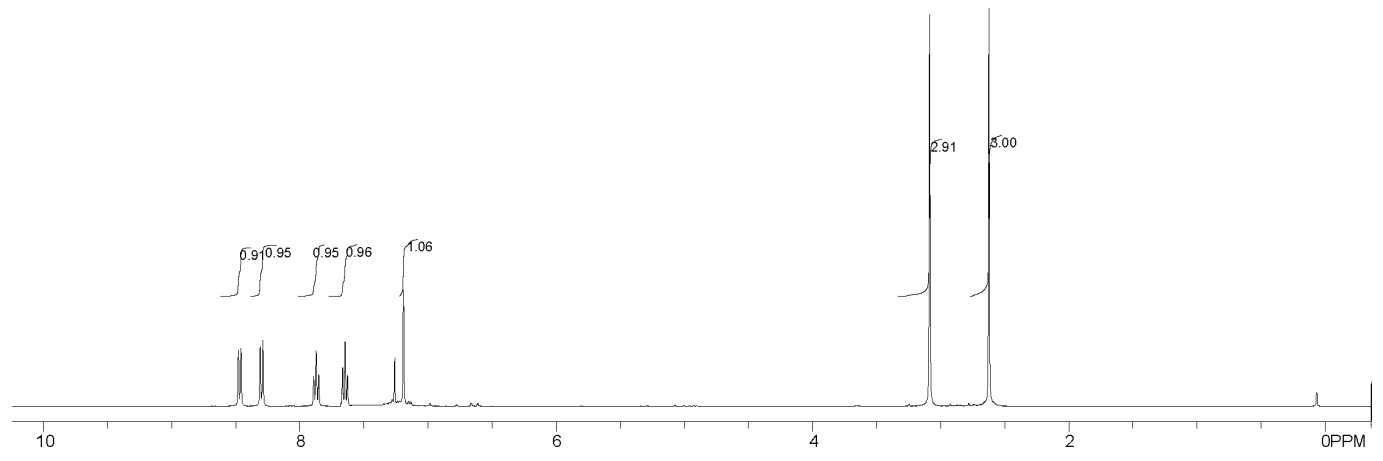

160.343  
153.888  
143.895  
141.101  
134.712  
134.481  
131.100  
128.953  
126.368  
122.076  
117.604  
116.975  
116.473  
112.632

77.358  
77.257  
77.046  
76.731

23.370  
21.074

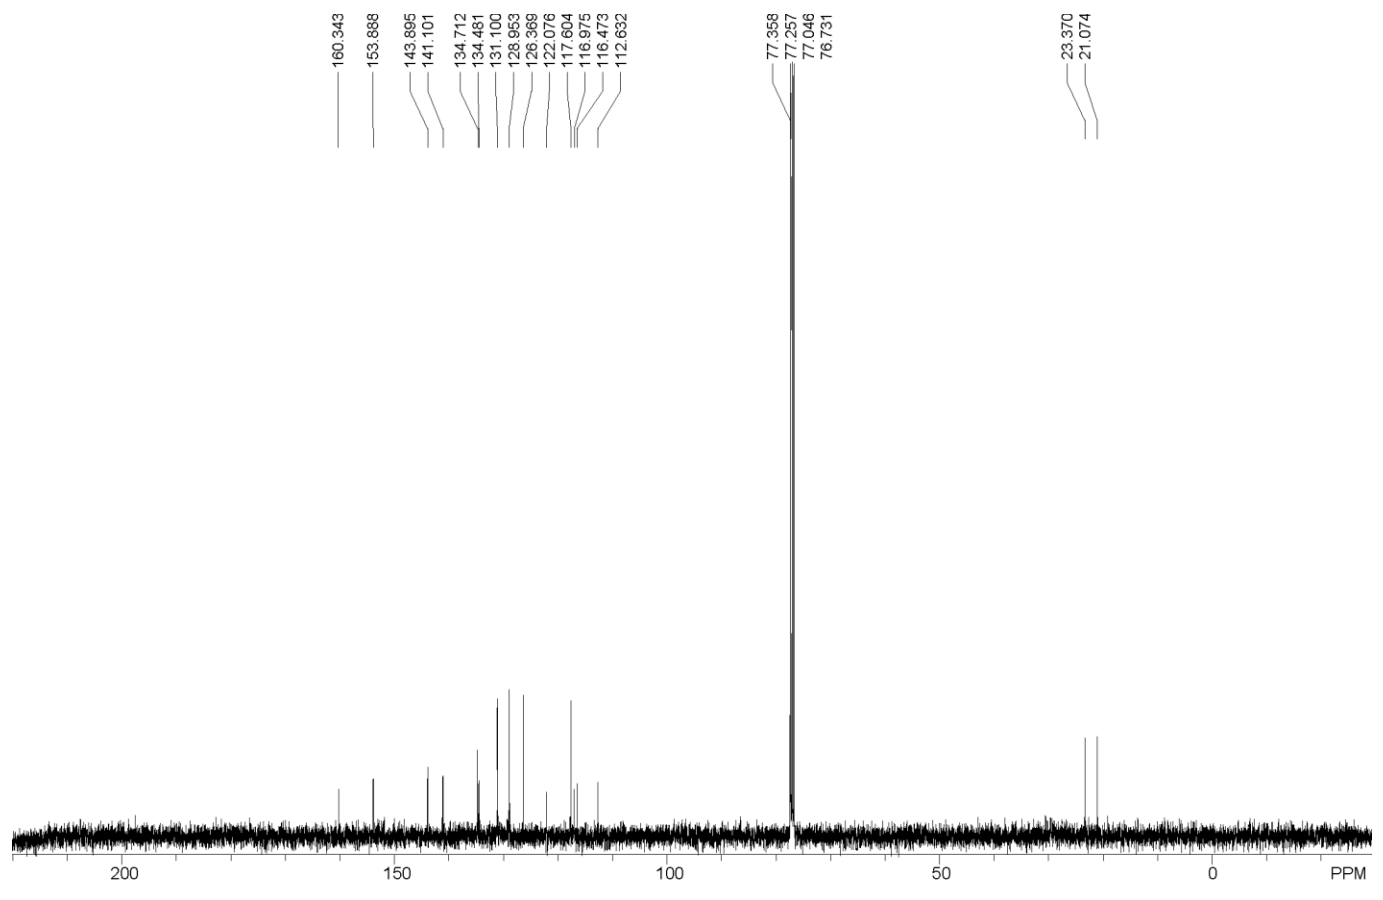

8.445  
8.425  
8.249  
8.229  
7.871  
7.851  
7.832  
7.850  
7.831  
7.813

3.011  
2.599  
2.420  
1.254

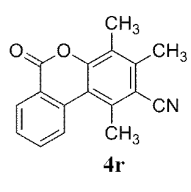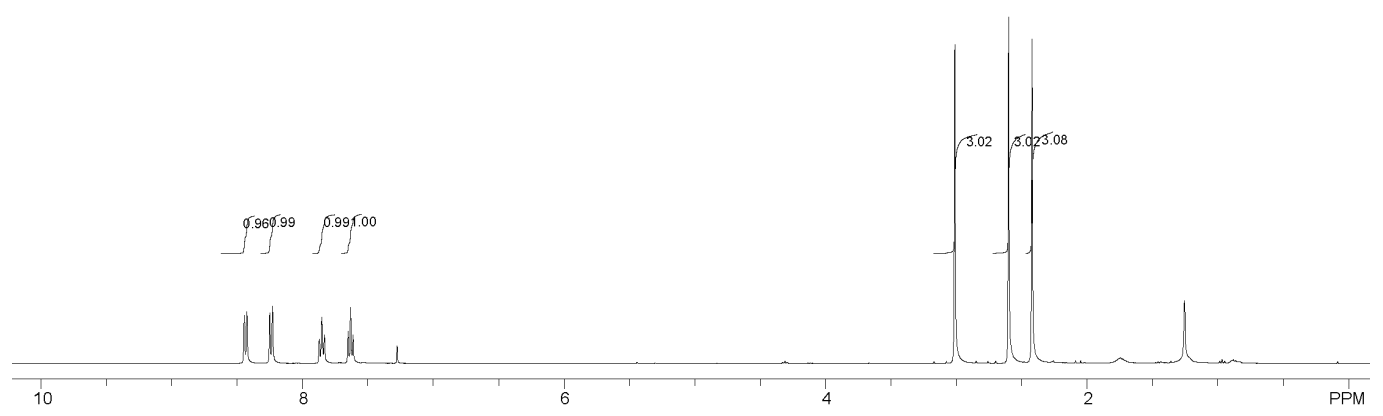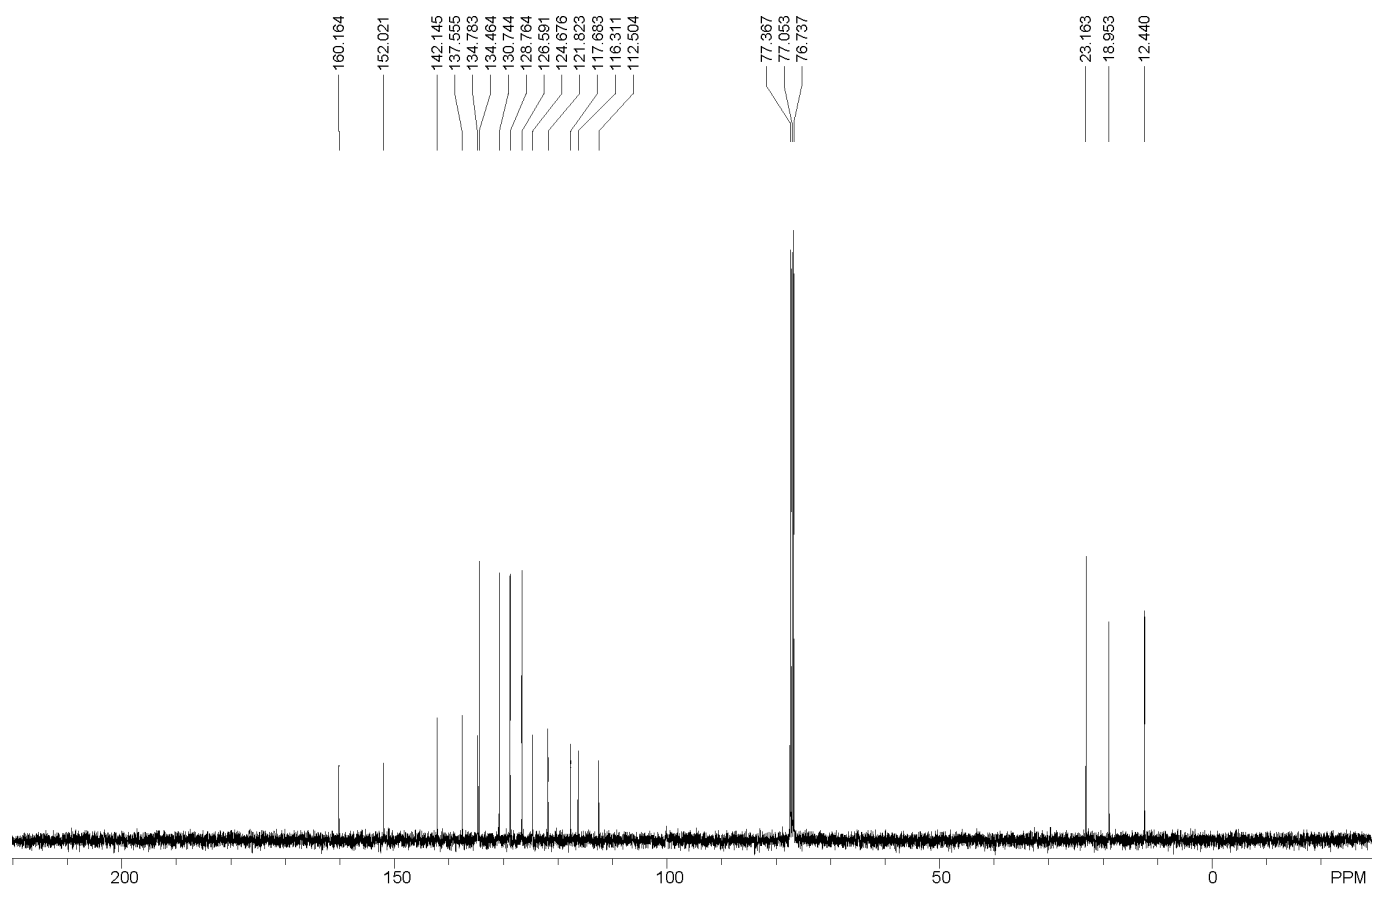

## V. References

- (1) A. Sniady, M. S. Morreale, R. Dembinski, *Org. Synth.*, 2007, **84**, 199.
- (2) W. L. Wu, Z. J. Yao, Y. L. Li, J. C. Li, Y. Xia, Y. L. Wu, *J. Org. Chem.*, 1995, **60**, 3257.
- (3) Q. R. Li, C. Z. Gu, H. Yin, *Chin. J. Chem.*, 2006, **24**, 72.
